# Supplementary material for: Expression profiling of potato germplasm differentiated in quality traits leads to the identification of candidate flavour and texture genes
Source: PubMed Central journal article supplement — J Exp Bot. 2008 Nov 5;59(15):4219–31. doi: 10.1093/jxb/ern264 (PMC2639024; doi:10.1093/jxb/ern264), 2008-11-05
Supplement: ern264_1.pdf [file ern264_1.pdf]

**Expression profiling of potato germplasm differentiated in quality traits leads to the identification of candidate flavour and texture genes**

Laurence J.M. Ducreux<sup>1</sup>, Wayne L. Morris<sup>1</sup>, Ian M. Prosser<sup>2</sup>, Jenny A. Morris<sup>3</sup>, Michael H. Beale<sup>2</sup>, Frank Wright<sup>4</sup>, Tom Shepherd<sup>1</sup>, Glenn, J Bryan<sup>3</sup>, Pete E. Hedley<sup>3</sup>, Mark A. Taylor<sup>1</sup>

**Figure S1.** Gene expression profiles of other genes possibly affecting tuber quality traits in Phureja (333-16, Mayan Gold) and Tuberosum (Desiree, Maris Piper) cultivars during tuber development (harvest stages H1 to H4-see methods for details) as determined by microarray analysis. Values are the means of three replicates and error bars represent standard error of the mean.

**Figure S2.** Scatter plot of mean probe intensities of gDNA hybridisations to POCI microarray. Data (intensity values >100) was combined from Tuberosum (Desiree and Maris Piper, X-axis) and Phureja (333-37 and 333-16, Y-axis) genotypes and plotted on log<sub>10</sub> scale.

**Table S1.** Genes differentially expressed between tubers of group Phureja and Tuberosum based on ANOVA analysis: a) probes with significantly higher levels of expression in Phureja; b) probes with significantly higher levels of expression in Tuberosum. Sampling (Harvest 1-4) is detailed in Materials and Methods for the 2005 trial. Probes were designed to target unigenes, (Probe ID; [http://pgrc-35.ipk-gatersleben.de/pls/htmldb\\_pgrc/f?p=194](http://pgrc-35.ipk-gatersleben.de/pls/htmldb_pgrc/f?p=194)) and are shown with their putative function

(Description) based upon BLAST searches. Fold-change (Normalized) is relative to median values of that gene for all samples. Significance of the differential expression is indicated by the t-test P-value.

**Table S2.** Genes differentially expressed in tubers between harvest time points based on ANOVA analysis. Sampling (Harvest 1-4) is detailed in Materials and Methods for the 2005 trial. Probes were designed to target unigenes, (Probe ID; [http://pgrc-35.ipk-gatersleben.de/pls/htmldb\\_pgrc/f?p=194](http://pgrc-35.ipk-gatersleben.de/pls/htmldb_pgrc/f?p=194)) and are shown with their putative function (Description) based upon BLAST searches. Fold-change (Normalized) is relative to median values of that gene for all samples. Significance of the differential expression is indicated by the t-test P-value.

**FIGURE S1.**

**A. Higher in Phureja**

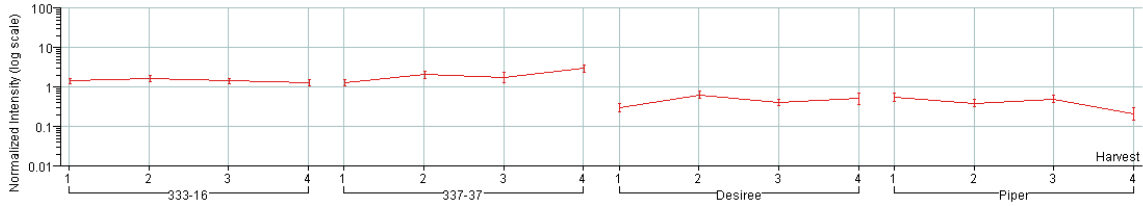

**Branched chain amino acid aminotransferase (MICRO.2772.C2\_1399)**

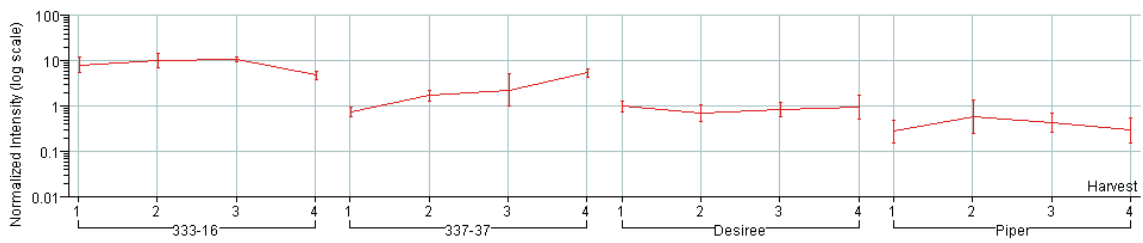

**Sesquiterpene synthase (MICRO.8755.C3\_977)**

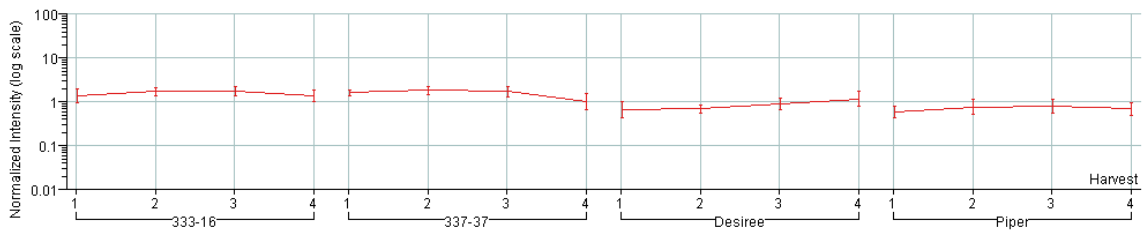

**Glutamate ammonia ligase (MICRO.3959.C1\_623)**

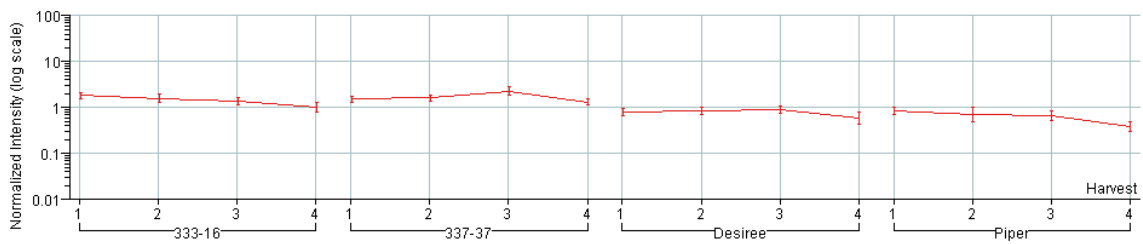

**Glutamate synthetase I (STMDI41TV\_515)**

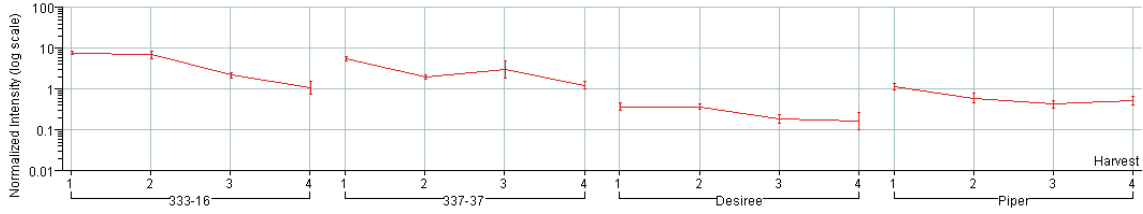

**Ribonuclease (MICRO.5716.C1\_596)**

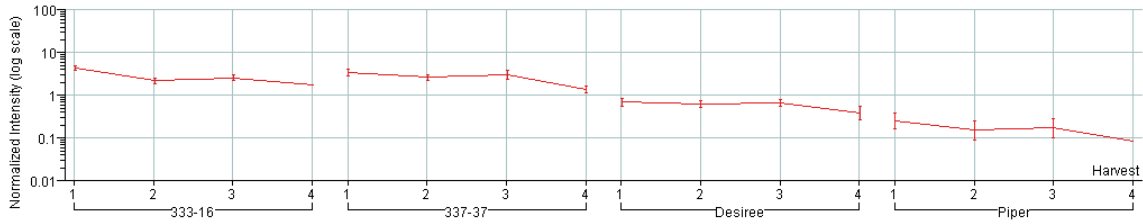

**Carotene beta-hydroxylase (MICRO.7880.C2\_1119)**

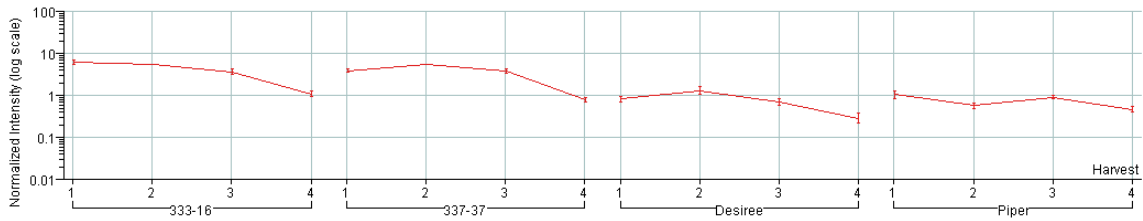

**Pectin acetyltransferase (MICRO.4427.C3\_1465)**

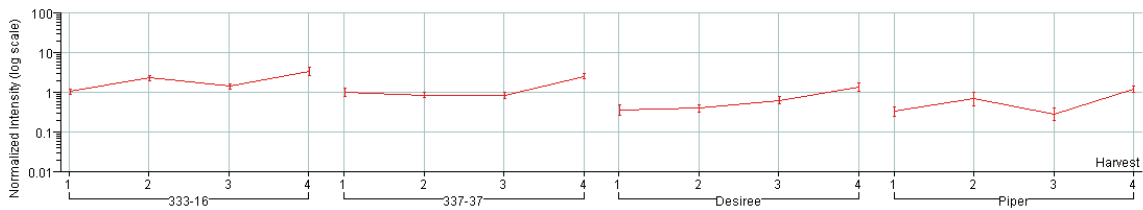

**Xyloglucan endotransglycosylase (MICRO.4152.C1\_825)**

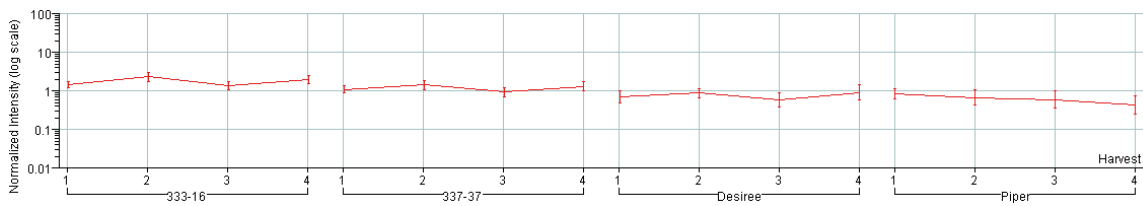

**NAD-dependent epimerase (bf\_arrayxxx\_0046b02.t7m.scf\_638)**

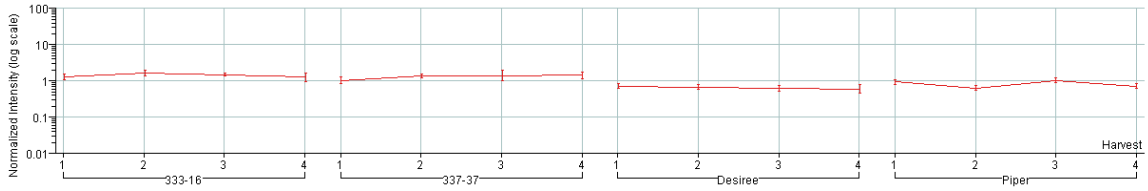

**Nucleotide-rhamnose synthase (MICRO.444.C1\_634)**

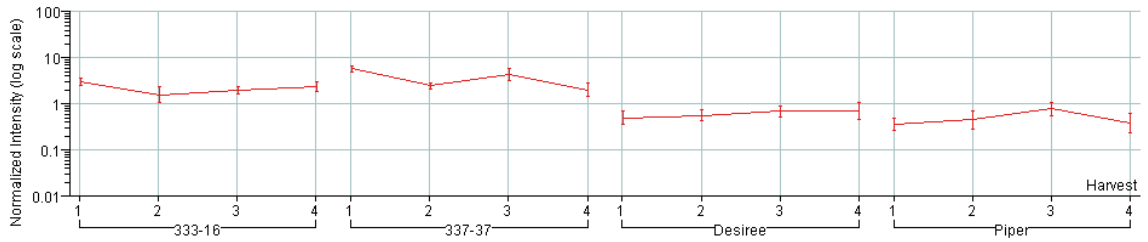

**Chitinase (MICRO.15095.C1\_874)**

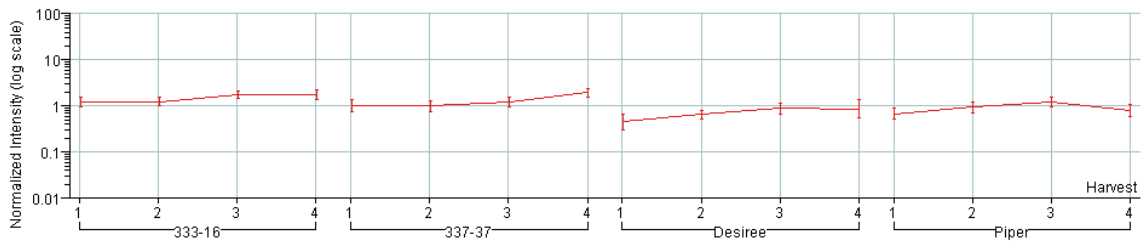

**FRIGIDA (MICRO.1851.C1\_1)**

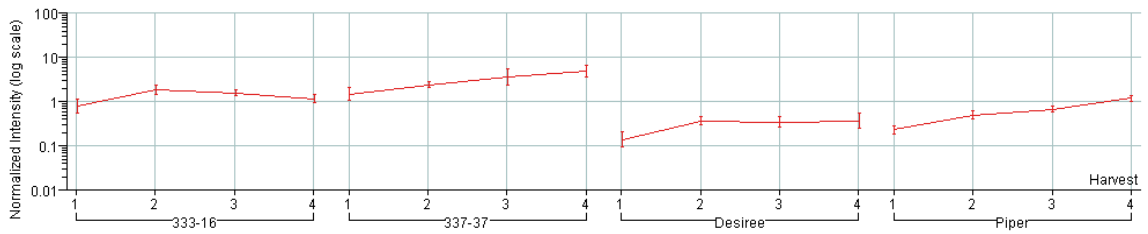

**Beta-amylase (MICRO.13823.C1\_1872)**

**B. Higher in Tuberosum**

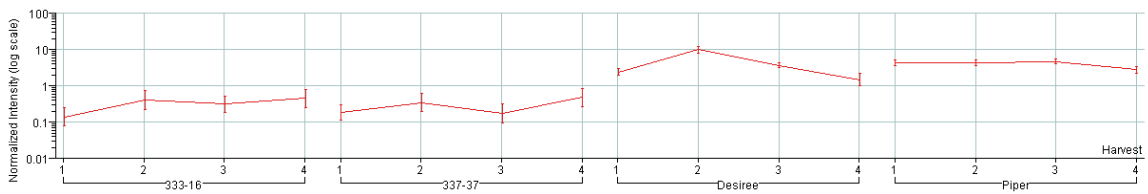

**GABA transaminase subunit 3 (MICRO.15425.C2)**

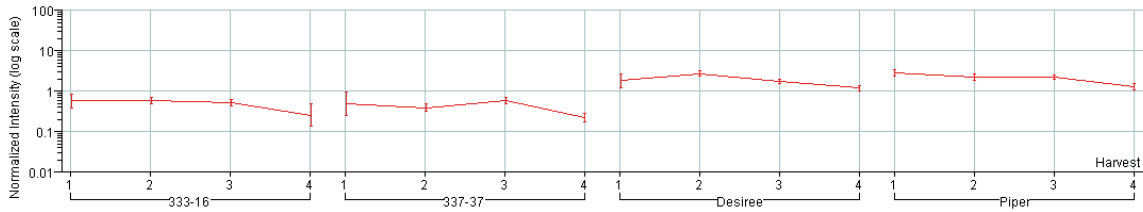

**Cystathione gamma synthase I (MICRO.1118.C2\_1798)**

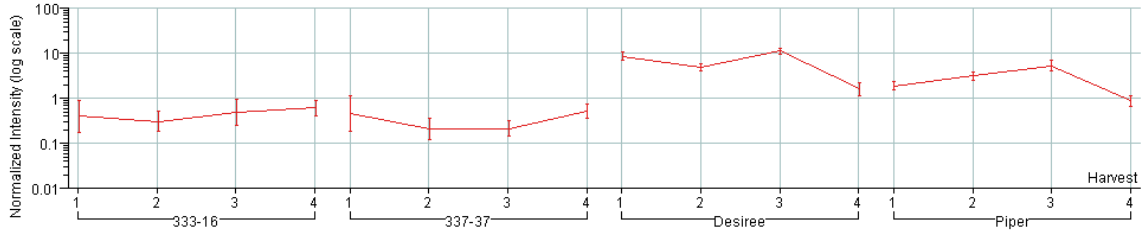

**Pectin methylesterase (MICRO.4403.C1\_728)**

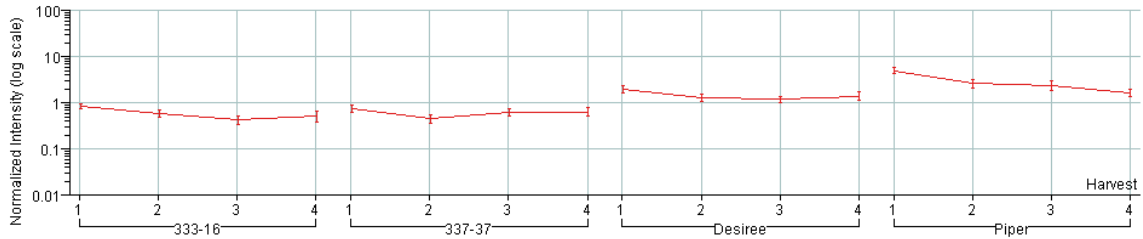

**Ent-kaurene oxidase (MICRO.10720.C2\_566)**

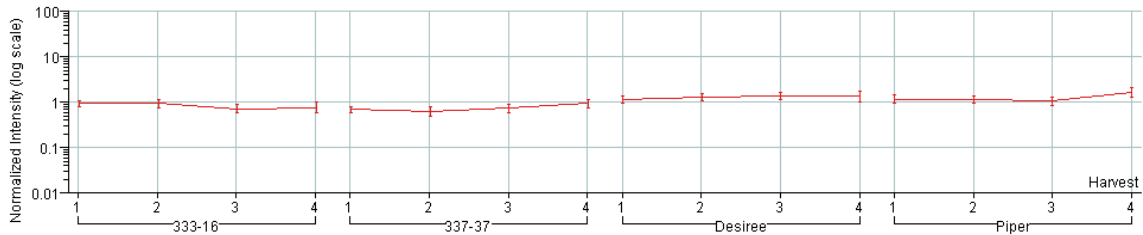

**Dimethylallyl transferase (MICRO.2151.C3\_724)**

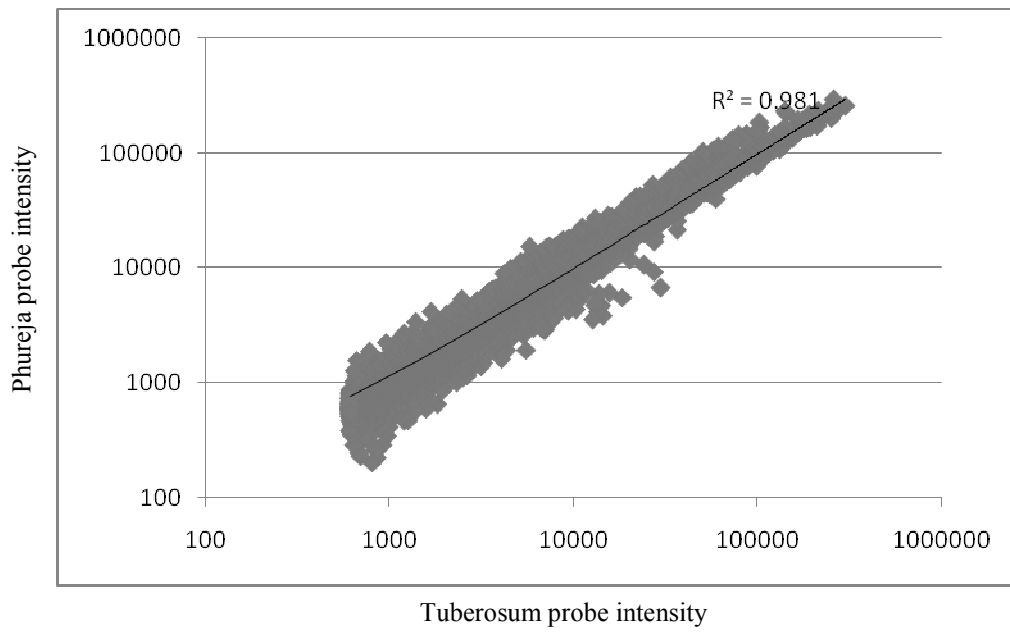

Figure S2

| Probe ID                       | Phage      |                |            |                | Tubercosm  |                |            |                | Genbank | Description |      |        |      |      |           |
|--------------------------------|------------|----------------|------------|----------------|------------|----------------|------------|----------------|---------|-------------|------|--------|------|------|-----------|
|                                | Normalized | t-test P-value |         |             |      |        |      |      |           |
| MCR01851.C1                    | 1.12       | 0.54           | 1.12       | 0.58           | 1.44       | 0.02           | 0.55       | 0.07           | 0.78    | 0.21        | 1.03 | 0.87   | 0.83 | 0.53 | NA        |
| SDN001142cd_455                | 3.85       | 0.03           | 4.13       | 0.00           | 3.85       | 0.00           | 4.07       | 0.00           | 4.11    | 0.00        | 4.11 | 0.00   | 4.11 | 0.00 | CG1451804 |
| MCR00663.C1_461                | 1.11       | 0.54           | 1.39       | 0.24           | 1.74       | 0.02           | 1.84       | 0.00           | 0.65    | 0.06        | 0.70 | 0.11   | 0.73 | 0.19 | 0.03      |
| STN02174_674                   | 1.29       | 0.37           | 1.29       | 0.37           | 1.29       | 0.37           | 1.29       | 0.37           | 1.29    | 0.37        | 1.29 | 0.37   | 1.29 | 0.37 | NA        |
| MCR00683.C1_1167               | 1.52       | 0.07           | 1.69       | 0.01           | 1.67       | 0.01           | 0.91       | 0.30           | 1.02    | 0.93        | 0.82 | 0.13   | 0.52 | 0.00 | BT014497  |
| MCR02016.C2_1484               | 1.03       | 0.88           | 1.42       | 0.05           | 2.03       | 0.00           | 2.23       | 0.00           | 0.89    | 0.39        | 0.69 | 0.07   | 0.94 | 0.65 | 0.30      |
| POC02917P_872                  | 1.31       | 0.07           | 1.31       | 0.07           | 2.32       | 0.00           | 2.29       | 0.00           | 0.73    | 0.13        | 0.62 | 0.01   | 0.79 | 0.01 | NA        |
| ACD00661B01_Thm sfd_308        | 1.37       | 0.08           | 1.10       | 0.49           | 1.15       | 0.32           | 1.18       | 0.24           | 0.64    | 0.02        | 0.61 | 0.02   | 0.71 | 0.06 | 0.62      |
| MCR01391.C1_18                 | 1.83       | 0.01           | 1.83       | 0.01           | 1.83       | 0.01           | 1.83       | 0.01           | 1.83    | 0.01        | 1.83 | 0.01   | 1.83 | 0.01 | NA        |
| MCR01160.C1_694                | 0.98       | 0.86           | 1.42       | 0.10           | 1.34       | 0.07           | 1.47       | 0.07           | 0.63    | 0.11        | 0.88 | 0.58   | 0.98 | 0.62 | 0.71      |
| STN02174_519                   | 1.68       | 0.01           | 1.69       | 0.03           | 1.75       | 0.02           | 1.77       | 0.02           | 0.83    | 0.18        | 0.78 | 0.27   | 0.77 | 0.15 | 0.48      |
| BF_TUBSXXX_003505_Thm SFCF_378 | 1.79       | 0.05           | 1.96       | 0.01           | 1.93       | 0.02           | 2.33       | 0.00           | 0.47    | 0.03        | 0.68 | 0.06   | 0.68 | 0.05 | 1.14      |
| MCR04000.C1_948                | 1.28       | 0.21           | 1.17       | 0.44           | 1.15       | 0.40           | 1.36       | 0.12           | 0.22    | 0.11        | 0.69 | 0.18   | 0.79 | 0.38 | 0.74      |
| MCR03073.C1_563                | 1.46       | 0.02           | 1.46       | 0.02           | 1.46       | 0.02           | 1.46       | 0.02           | 0.90    | 0.61        | 0.58 | 0.16   | 0.67 | 0.22 | NA        |
| MCR02456.C3_1305               | 1.77       | 0.05           | 1.61       | 0.02           | 1.41       | 0.02           | 1.03       | 0.81           | 0.00    | 0.95        | 0.77 | 0.08   | 0.75 | 0.04 | 0.47      |
| SDN001142cd_193                | 1.31       | 0.29           | 1.62       | 0.20           | 1.98       | 0.03           | 2.00       | 0.00           | 0.60    | 0.08        | 0.80 | 0.47   | 0.76 | 0.23 | 1.06      |
| MCR01933.C1_757                | 1.13       | 0.01           | 1.13       | 0.01           | 1.46       | 0.08           | 1.44       | 0.00           | 0.70    | 0.08        | 0.68 | 0.02   | 0.76 | 0.18 | 0.46      |
| MCR012781.C1_486               | 2.02       | 0.00           | 1.03       | 0.87           | 1.07       | 0.09           | 1.78       | 0.02           | 0.78    | 0.24        | 0.43 | 0.03   | 0.77 | 0.36 | 0.61      |
| POC02917P_565                  | 1.45       | 0.03           | 2.00       | 0.01           | 1.78       | 0.02           | 1.55       | 0.05           | 0.58    | 0.00        | 0.28 | 0.00   | 0.47 | 0.09 | 0.45      |
| TBKS0088FA12_0m sfd_327        | 2.73       | 0.00           | 1.52       | 0.04           | 1.64       | 0.02           | 1.53       | 0.56           | 0.83    | 0.35        | 0.75 | 0.16   | 0.73 | 0.20 | 0.65      |
| MCR02730.C2_1293               | 2.28       | 0.01           | 1.27       | 0.35           | 1.55       | 0.02           | 2.28       | 0.00           | 0.25    | 0.00        | 0.28 | 0.01   | 0.28 | 0.01 | 0.35      |
| DI_000000_000012_0m sfd_245    | 1.47       | 0.04           | 1.47       | 0.04           | 1.75       | 0.01           | 1.49       | 0.02           | 0.52    | 0.01        | 0.43 | 0.01   | 0.68 | 0.02 | 0.47      |
| STN02174_236                   | 1.24       | 0.24           | 1.17       | 0.34           | 1.44       | 0.03           | 1.38       | 0.09           | 0.59    | 0.04        | 0.79 | 0.19   | 1.04 | 0.80 | 0.81      |
| MCR03903.C2_798                | 1.38       | 0.14           | 1.40       | 0.05           | 1.77       | 0.01           | 2.45       | 0.01           | 0.50    | 0.01        | 0.36 | 0.00   | 0.51 | 0.01 | 0.52      |
| MCR03678.C2_1237               | 1.21       | 0.16           | 1.34       | 0.23           | 1.48       | 0.09           | 1.84       | 0.23           | 0.51    | 0.05        | 0.54 | 0.04   | 0.68 | 0.21 | 0.40      |
| MCR01700.C1_1002               | 1.49       | 0.05           | 1.00       | 0.99           | 1.18       | 0.37           | 2.75       | 0.00           | 0.39    | 0.04        | 0.64 | 0.13   | 0.64 | 0.17 | 0.90      |
| MCR01729.C1_1244               | 2.10       | 0.00           | 1.97       | 0.00           | 1.60       | 0.01           | 1.91       | 0.06           | 0.75    | 0.15        | 0.74 | 0.42   | 0.51 | 0.04 | 0.35      |
| MCR013196.C4_1228              | 0.95       | 0.75           | 3.58       | 0.00           | 3.71       | 0.05           | 8.28       | 0.00           | 0.37    | 0.00        | 0.36 | 0.00   | 0.33 | 0.01 | 0.12      |
| STN02174_874                   | 2.11       | 0.06           | 3.11       | 0.04           | 1.39       | 0.33           | 1.71       | 0.04           | 0.68    | 0.18        | 0.73 | 0.37   | 0.87 | 0.26 | 0.46      |
| MCR0605.C1_2183                | 3.30       | 0.00           | 1.55       | 0.02           | 1.87       | 0.00           | 1.35       | 0.08           | 0.62    | 0.04        | 0.49 | 0.01   | 0.50 | 0.02 | 0.68      |
| MCR014302.C1_1112              | 1.15       | 0.11           | 3.22       | 0.11           | 2.20       | 0.26           | 1.12       | 0.51           | 0.76    | 0.13        | 0.85 | 0.29   | 0.71 | 0.12 | 0.67      |
| MCR01328.C1_611                | 1.01       | 0.96           | 1.91       | 0.06           | 1.79       | 0.03           | 1.81       | 0.02           | 0.72    | 0.01        | 0.84 | 0.02   | 0.73 | 0.36 | 0.70      |
| MCR015096.C1_874               | 4.18       | 0.00           | 1.98       | 0.01           | 2.90       | 0.01           | 2.21       | 0.00           | 0.42    | 0.02        | 0.51 | 0.06   | 0.74 | 0.22 | 0.48      |
| MCR01498.C1_1263               | 2.88       | 0.00           | 1.14       | 0.20           | 1.18       | 0.44           | 0.60       | 0.00           | 0.47    | 0.18        | 0.44 | 0.08   | 0.54 | 0.08 | 0.54      |
| MCR04742.C1_1112               | 1.37       | 0.05           | 1.09       | 0.01           | 1.01       | 2.62           | 0.00       | 0.41           | 0.00    | 0.55        | 0.05 | 0.51   | 0.01 | 0.69 | 0.05      |
| MCR02997.C2_625                | 1.47       | 0.02           | 1.29       | 0.10           | 1.35       | 0.07           | 1.31       | 0.08           | 0.77    | 0.12        | 0.57 | 0.02   | 0.76 | 0.15 | 0.64      |
| MCR03305.C2_862                | 1.83       | 0.07           | 1.59       | 0.13           | 1.72       | 0.07           | 1.76       | 0.02           | 0.63    | 0.09        | 0.62 | 0.17   | 0.76 | 0.28 | 0.83      |
| MCR008191.C1_609               | 1.07       | 0.15           | 1.27       | 0.40           | 1.18       | 0.35           | 1.29       | 0.22           | 0.74    | 0.17        | 0.61 | 0.06   | 0.76 | 0.28 | 0.64      |
| MCR01891.C1_41                 | 1.46       | 0.00           | 1.46       | 0.00           | 1.46       | 0.00           | 1.46       | 0.00           | 1.46    | 0.00        | 1.46 | 0.00   | 1.46 | 0.00 | NA        |
| DI_000000_003405_0m sfd_48     | 1.85       | 0.00           | 1.52       | 0.03           | 1.84       | 0.02           | 0.97       | 0.80           | 0.14    | 0.87        | 0.54 | 0.66   | 0.61 | 0.65 | 0.02      |
| BF_TUBSXXX_005296_Thm SFCF_259 | 1.24       | 0.08           | 1.84       | 0.00           | 2.12       | 0.02           | 2.83       | 0.00           | 0.63    | 0.08        | 0.50 | 0.01   | 0.67 | 0.19 | 0.55      |
| MCR01663.C4_1077               | 1.73       | 0.02           | 1.73       | 0.02           | 1.73       | 0.02           | 1.73       | 0.02           | 0.24    | 0.03        | 0.45 | 0.03   | 0.45 | 0.03 | 0.45      |
| MCR01196.C1_1290               | 1.18       | 0.38           | 2.43       | 0.00           | 2.17       | 0.02           | 5.08       | 0.00           | 0.65    | 0.02        | 0.66 | 0.06   | 0.56 | 0.02 | 0.70      |
| MCR01498.C1_1263               | 2.87       | 0.00           | 1.14       | 0.20           | 1.18       | 0.44           | 0.60       | 0.00           | 0.47    | 0.18        | 0.44 | 0.08   | 0.53 | 0.09 | 0.53      |
| DI_000000_003401_0m sfd_543    | 2.18       | 0.00           | 1.18       | 0.27           | 1.53       | 0.06           | 1.11       | 0.45           | 0.88    | 0.35        | 0.61 | 0.53   | 0.94 | 0.65 | 0.91      |
| STN02174_519                   | 3.30       | 0.05           | 1.56       | 0.02           | 1.65       | 0.01           | 1.30       | 0.05           | 0.93    | 0.68        | 0.42 | 0.03   | 0.70 | 0.05 | 0.66      |
| MCR01722.C1_792                | 1.13       | 0.02           | 1.11       | 0.12           | 1.93       | 0.12           | 1.13       | 0.13           | 0.13    | 0.13        | 0.13 | 0.13   | 0.13 | 0.13 | 0.13      |
| BF_TUBSXXX_001409_Thm SFCF_121 | 1.70       | 0.02           | 1.05       | 0.78           | 1.38       | 0.05           | 1.59       | 0.02           | 0.47    | 0.07        | 0.63 | 0.24   | 0.65 | 0.03 | 0.86      |
| MCR0223.C1_723                 | 1.08       | 0.81           | 1.08       | 0.81           | 1.08       | 0.81           | 1.08       | 0.81           | 1.08    | 0.81        | 1.08 | 0.81   | 1.08 | 0.81 | 1.08      |
| DI_000000_004303_0m sfd_142    | 1.77       | 0.24           | 1.47       | 0.07           | 1.48       | 0.06           | 1.90       | 0.00           | 0.29    | 0.03        | 0.48 | 0.01   | 0.32 | 0.04 | 0.38      |
| MCR015406.C1_800               | 3.36       | 0.00           | 1.31       | 0.13           | 1.43       | 0.21           | 1.08       | 0.63           | 0.89    | 0.65        | 0.83 | 0.23   | 0.68 | 0.09 | 0.89      |
| MCR010905.C1_952               | 1.92       | 0.02           | 1.92       | 0.02           | 1.92       | 0.02           | 2.07       | 0.01           | 0.19    | 0.01        | 0.26 | 0.01   | 0.26 | 0.01 | 0.26      |
| MCR016732.C1_686               | 1.58       | 0.01           | 1.24       | 0.20           | 1.47       | 0.01           | 1.13       | 0.13           | 0.69    | 0.16        | 0.68 | 0.02   | 0.61 | 0.39 | 0.00      |
| MCR01568.C1_770                | 1.89       | 0.08           | 1.89       | 0.08           | 1.89       | 0.08           | 1.89       | 0.08           | 1.89    | 0.08        | 1.89 | 0.08   | 1.89 | 0.08 | 1.89      |
| DI_000000_001260_0m sfd_28     | 1.05       | 0.64           | 1.14       | 0.48           | 1.41       | 0.05           | 1.34       | 0.05           | 0.84    | 0.25        | 0.78 | 0.27   | 0.82 | 0.13 | 0.91      |
| MCR01722.C1_1015               | 1.05       | 0.68           | 1.18       | 0.29           | 1.26       | 0.17           | 2.03       | 0.00           | 0.64    | 0.04        | 0.73 | 0.09   | 0.69 | 0.08 | 1.18      |
| MCR0333.C2_667                 | 1.15       | 0.02           | 1.15       | 0.02           | 1.18       | 0.27           | 1.15       | 0.42           | 0.71    | 0.09        | 1.00 | 0.09   | 1.00 | 0.09 | 1.00      |
| DI_000000_003401_0m sfd_321    | 1.38       | 0.04           | 1.59       | 0.02           | 1.80       | 0.01           | 1.11       | 0.53           | 0.67    | 0.17        | 0.70 | 0.09   | 0.79 | 0.19 | 0.63      |
| DI_000000_001869_0m sfd_670    | 1.13       | 0.40           | 1.42       | 0.03           | 2.63       | 0.04           | 3.53       | 0.00           | 0.42    | 0.03        | 0.46 | 0.05   | 0.91 | 0.58 | 0.02      |
| DI_000000_003401_0m sfd_536    | 1.27       | 0.00           | 0.84       | 0.36           | 1.34       | 0.05           | 1.41       | 0.03           | 0.83    | 0.39        | 0.50 | 0.01   | 0.75 | 0.13 | 0.81      |
| MCR014732.C1_1111              | 1.04       | 0.84           | 1.04       | 0.84           | 1.04       | 0.84           | 1.04       | 0.84           | 1.04    | 0.84        | 1.04 | 0.84   | 1.04 | 0.84 | 1.04      |
| MCR0232.C2_1689                | 2.97       | 0.00           | 1.81       | 0.01           | 2.04       | 0.00           | 2.26       | 0.01           | 0.28    | 0.00        | 0.29 | 0.01   | 0.28 | 0.00 | 0.13      |
| DI_000000_000612_0m sfd_726    | 1.23       | 0.03           | 2.45       | 0.00           | 1.89       | 0.06           | 1.84       | 0.00           | 0.53    | 0.08        | 0.56 | 0.07   | 0.45 | 0.01 | 0.17      |
| DI_000000_000612_0m sfd_475    | 1.66       | 0.04           | 1.66       | 0.04           | 1.66       | 0.04           | 1.66       | 0.04           | 1.66    | 0.04        | 1.66 | 0.04   | 1.66 | 0.04 | 1.66      |
| MCR03479.C1_1392               | 1.12       | 0.28           | 1.53       | 0.02           | 1.99       | 0.02           | 1.17       | 0.54           | 0.21    | 0.44        | 0.60 | 0.02   | 0.72 | 0.08 | 1.18      |
| MCR03773.C1_698                | 1.48       | 0.07           | 1.44       | 0.24           | 1.40       | 0.25           | 1.13       | 0.41           | 0.83    | 0.26        | 0.63 | 0.03   | 0.73 | 0.18 | 0.81      |
| MCR0303.C1_368                 | 1.20       | 0.40           | 1.12       | 0.61           | 1.76       | 0.01           | 1.82       | 0.01           | 0.50    | 0.28        | 0.30 | 0.01   | 0.82 | 0.34 | 0.77      |
| POC02917P_872                  | 1.47       | 0.01           | 1.37       | 0.01           | 1.84       | 0.01           | 2.42       | 0.12           | 0.65    | 0.03        | 0.74 | 0.13   | 0.69 | 0.07 | 0.47      |
| MCR03678.C2_1018               | 2.42       | 0.02           | 1.93       | 0.03           | 2.05       | 0.01           | 1.13       | 0.13           | 0.63    | 0.24        | 0.39 | 0.29</ |      |      |           |



|                                |      |      |      |      |      |      |       |      |      |      |      |      |      |      |      |      |          |                                                                                |
|--------------------------------|------|------|------|------|------|------|-------|------|------|------|------|------|------|------|------|------|----------|--------------------------------------------------------------------------------|
| bl_mfxxx0090933m_scd_283       | 1.14 | 0.38 | 1.68 | 0.01 | 1.48 | 0.10 | 2.39  | 0.00 | 0.48 | 0.00 | 0.77 | 0.16 | 0.54 | 0.01 | 0.92 | 0.05 | NA       | unknown protein (Arabidopsis thaliana)                                         |
| bl_mfxxx0090953m_scd_445       | 2.11 | 0.47 | 1.27 | 0.01 | 1.48 | 0.10 | 2.39  | 0.00 | 0.48 | 0.00 | 0.77 | 0.16 | 0.54 | 0.01 | 0.92 | 0.05 | NA       | unknown protein (Arabidopsis thaliana)                                         |
| IPK011697H_504                 | 1.48 | 0.03 | 1.27 | 0.25 | 1.56 | 0.04 | 1.63  | 0.06 | 0.68 | 0.17 | 0.48 | 0.06 | 0.78 | 0.37 | 0.76 | 0.38 | NA       | glucose-6-phosphate 4-epimerase (Arabidopsis thaliana)                         |
| bl_mfxxx0090953m_scd_435       | 0.88 | 0.32 | 1.33 | 0.12 | 1.38 | 0.08 | 1.59  | 0.04 | 0.75 | 0.30 | 0.78 | 0.33 | 0.77 | 0.19 | 0.80 | 0.09 | AY18665  | Phytochrome b-interacting factor (Capsicum chinense)                           |
| MCR0177381_303                 | 2.76 | 0.01 | 2.49 | 0.01 | 2.49 | 0.01 | 2.49  | 0.01 | 2.49 | 0.01 | 2.49 | 0.01 | 2.49 | 0.01 | 2.49 | 0.01 | NA       | NA                                                                             |
| ESTB417H_142                   | 2.13 | 0.00 | 2.06 | 0.01 | 1.70 | 0.01 | 1.18  | 0.25 | 0.77 | 0.11 | 0.78 | 0.10 | 0.63 | 0.01 | 0.67 | 0.04 | NA       | NA                                                                             |
| MCR03561C1_899                 | 3.49 | 0.00 | 3.49 | 0.00 | 3.49 | 0.00 | 3.49  | 0.00 | 3.49 | 0.00 | 3.49 | 0.00 | 3.49 | 0.00 | 3.49 | 0.00 | NA       | hypochlorite protein (Solanum tuberosum)                                       |
| MCR07734C1_875                 | 3.20 | 0.00 | 2.46 | 0.18 | 2.46 | 0.01 | 2.35  | 0.00 | 0.34 | 0.01 | 0.38 | 0.03 | 0.36 | 0.04 | 0.38 | 0.12 | NA11304  | Os03g0578000 (Xenopus salvia (african cuttlefish))                             |
| MCR01196C1_910                 | 1.38 | 0.03 | 1.40 | 0.19 | 1.22 | 0.15 | 1.76  | 0.01 | 0.73 | 0.09 | 0.93 | 0.81 | 0.65 | 0.05 | 0.65 | 0.09 | AM472807 | putative protein (Arabidopsis thaliana)                                        |
| MCR02076C2_1031                | 1.23 | 0.02 | 1.23 | 0.02 | 1.23 | 0.02 | 1.23  | 0.02 | 1.23 | 0.02 | 1.23 | 0.02 | 1.23 | 0.02 | 1.23 | 0.02 | NA       | putative protein (Arabidopsis thaliana)                                        |
| bl_mfxxx0020073m_scd_707       | 3.81 | 0.00 | 3.17 | 0.00 | 3.65 | 0.00 | 2.21  | 0.00 | 0.47 | 0.01 | 0.33 | 0.02 | 0.42 | 0.02 | 0.47 | 0.01 | NA       | Lycium lactus beta domain - E class P450, gene1 (Medicago truncatula)          |
| MCR01481C1_1547                | 0.91 | 0.17 | 1.37 | 0.01 | 1.37 | 0.01 | 1.37  | 0.01 | 1.37 | 0.01 | 1.37 | 0.01 | 1.37 | 0.01 | 1.37 | 0.01 | AY093851 | cytochrome P450 (Solanum tuberosum)                                            |
| bl_mfxxx00448063m_scd_523      | 2.03 | 0.00 | 1.69 | 0.05 | 2.01 | 0.01 | 0.80  | 0.39 | 0.72 | 0.18 | 0.71 | 0.12 | 0.86 | 0.47 | 0.44 | 0.09 | NA       | NA                                                                             |
| MCR02388C1_1095                | 1.67 | 0.01 | 1.24 | 0.18 | 1.49 | 0.05 | 1.20  | 0.31 | 0.62 | 0.67 | 0.73 | 0.09 | 0.70 | 0.11 | 0.71 | 0.29 | NA       | gelatinase B (Pisum sativum)                                                   |
| ESTB0000141_413                | 1.67 | 0.01 | 1.30 | 0.13 | 1.46 | 0.02 | 1.10  | 0.52 | 0.71 | 0.07 | 0.88 | 0.41 | 0.71 | 0.07 | 0.81 | 0.31 | AY011131 | BDP1 (R. ADE ON FR1042) protein binding (Arabidopsis thaliana)                 |
| MCR01707C1_712                 | 1.10 | 0.53 | 1.27 | 0.28 | 2.04 | 0.10 | 1.84  | 0.02 | 0.64 | 0.42 | 0.48 | 0.08 | 0.76 | 0.39 | 0.81 | 0.60 | AM70105  | kinase (Arabidopsis thaliana)                                                  |
| SSBND01043u_scd_383            | 1.86 | 0.01 | 1.78 | 0.01 | 2.49 | 0.00 | 1.95  | 0.01 | 0.38 | 0.00 | 0.48 | 0.00 | 0.58 | 0.01 | 0.52 | 0.01 | AY22223  | cytochrome P450 (Solanum tuberosum)                                            |
| bl_mfxxx0035053m_scd_99        | 3.23 | 0.00 | 1.69 | 0.14 | 2.95 | 0.03 | 2.34  | 0.02 | 0.61 | 0.59 | 0.41 | 0.52 | 0.63 | 0.13 | 0.37 | 0.11 | NA       | NA                                                                             |
| MCR01802C1_312                 | 1.57 | 0.01 | 1.38 | 0.08 | 1.87 | 0.01 | 2.01  | 0.00 | 0.54 | 0.03 | 0.51 | 0.02 | 0.72 | 0.12 | 0.71 | 0.29 | NA       | hypochlorite protein (Arabidopsis thaliana)                                    |
| ESTB0217V_377                  | 2.36 | 0.00 | 1.30 | 0.14 | 1.40 | 0.11 | 1.14  | 0.42 | 0.60 | 0.33 | 0.45 | 0.01 | 0.42 | 0.02 | 0.43 | 0.04 | NA       | NA                                                                             |
| MCR016623C1_449                | 2.81 | 0.00 | 2.22 | 0.00 | 1.65 | 0.09 | 0.89  | 0.88 | 0.83 | 0.19 | 0.77 | 0.10 | 0.81 | 0.49 | 0.50 | 0.02 | NA       | calcium ion binding (Arabidopsis thaliana)                                     |
| BP_TURE300C_04238m_TAM_SCF_474 | 3.29 | 0.00 | 1.98 | 0.02 | 2.24 | 0.02 | 0.94  | 0.65 | 0.42 | 0.34 | 0.23 | 0.20 | 0.50 | 0.19 | 0.53 | 0.02 | NA       | unknown protein (Arabidopsis thaliana)                                         |
| MCR012893C1_775                | 1.09 | 0.49 | 1.77 | 0.02 | 1.54 | 0.01 | 1.39  | 0.05 | 0.34 | 0.01 | 0.53 | 0.14 | 0.50 | 0.01 | 0.54 | 0.05 | NA       | NA                                                                             |
| bl_mfxxx0026503m_scd_68        | 1.69 | 0.01 | 1.58 | 0.03 | 1.70 | 0.08 | 1.52  | 0.08 | 0.48 | 0.01 | 0.50 | 0.02 | 0.60 | 0.07 | 0.60 | 0.08 | NA       | NA                                                                             |
| POCK0097H_101                  | 1.89 | 0.00 | 3.93 | 0.00 | 2.97 | 0.00 | 1.94  | 0.01 | 0.32 | 0.00 | 0.37 | 0.00 | 0.43 | 0.01 | 0.42 | 0.02 | AY32223  | monosaccharide transporter (Nicotiana glauca)                                  |
| ESTB0177V_549                  | 0.86 | 0.32 | 1.46 | 0.03 | 2.00 | 0.03 | 3.42  | 0.00 | 0.44 | 0.00 | 0.48 | 0.11 | 0.63 | 0.19 | 0.71 | 0.34 | NA       | Os06g028300 (Xenopus salvia (african cuttlefish))                              |
| SSBND01043u_scd_386            | 1.97 | 0.00 | 1.98 | 0.01 | 2.88 | 0.01 | 1.61  | 0.01 | 0.10 | 0.00 | 0.24 | 0.00 | 0.10 | 0.01 | 0.14 | 0.02 | NA       | NA                                                                             |
| MCR013373C1_703                | 2.33 | 0.00 | 2.71 | 0.02 | 2.34 | 0.00 | 0.88  | 0.50 | 0.70 | 0.58 | 0.86 | 0.39 | 0.84 | 0.25 | 0.53 | 0.13 | NA       | TPA hypochlorite protein (Rice turgor bacilliform virus)                       |
| MCR01173C1_1794                | 1.33 | 0.05 | 1.38 | 0.08 | 1.35 | 0.06 | 1.43  | 0.06 | 0.89 | 0.45 | 0.85 | 0.27 | 0.79 | 0.16 | 0.73 | 0.15 | AM48143  | lysine (Medicago truncatula)                                                   |
| ESTB0241H_150                  | 1.74 | 0.00 | 2.24 | 0.01 | 2.79 | 0.00 | 1.14  | 0.30 | 0.97 | 0.04 | 0.98 | 0.01 | 0.61 | 0.03 | 0.68 | 0.04 | NA       | NA                                                                             |
| ESTB0207H_566                  | 1.92 | 0.00 | 2.06 | 0.07 | 2.58 | 0.00 | 1.17  | 0.24 | 0.68 | 0.12 | 0.62 | 0.04 | 0.61 | 0.03 | 0.70 | 0.15 | AM48951  | similar to wvs absent protein (Arabidopsis thaliana)                           |
| BP_TURE300C_04238m_TAM_SCF_317 | 3.83 | 0.00 | 3.00 | 0.00 | 2.77 | 0.07 | 3.16  | 0.00 | 0.32 | 0.01 | 0.31 | 0.04 | 0.29 | 0.01 | 0.48 | 0.04 | AC11987  | NA                                                                             |
| MCR013054C2_589                | 3.05 | 0.00 | 3.47 | 0.00 | 3.92 | 0.00 | 7.06  | 0.00 | 0.40 | 0.01 | 0.44 | 0.02 | 0.60 | 0.03 | 0.63 | 0.05 | AY498119 | disulfide oxidoreductase/m monooxygenase/oxidoreductase (Arabidopsis thaliana) |
| POCK0097H_74                   | 2.34 | 0.00 | 2.33 | 0.00 | 2.79 | 0.08 | 2.18  | 0.01 | 0.50 | 0.02 | 0.56 | 0.02 | 0.43 | 0.01 | 0.39 | 0.01 | AY224824 | NA                                                                             |
| MCR01222C1_476                 | 3.81 | 0.00 | 3.51 | 0.00 | 3.63 | 0.00 | 3.62  | 0.00 | 2.92 | 0.00 | 2.92 | 0.00 | 2.92 | 0.00 | 2.92 | 0.00 | NA       | NA                                                                             |
| POCK0097H_773                  | 1.57 | 0.05 | 1.85 | 0.02 | 1.94 | 0.01 | 1.60  | 0.13 | 0.18 | 0.06 | 0.48 | 0.14 | 0.37 | 0.11 | 0.40 | 0.21 | NA       | NA                                                                             |
| MCR01118C1_738                 | 1.89 | 0.00 | 2.81 | 0.00 | 1.88 | 0.01 | 1.87  | 0.06 | 0.24 | 0.00 | 0.24 | 0.00 | 0.24 | 0.00 | 0.24 | 0.00 | NA       | glucanase class 3 (Medicago truncatula)                                        |
| MCR04318C2_655                 | 1.73 | 0.01 | 1.53 | 0.01 | 2.01 | 0.01 | 1.31  | 0.09 | 0.61 | 0.56 | 0.66 | 0.64 | 0.64 | 0.64 | 0.64 | 0.64 | AM48861  | similar to wvs absent protein (Arabidopsis thaliana)                           |
| MCR01367C1_477                 | 1.23 | 0.17 | 1.48 | 0.09 | 1.33 | 0.13 | 1.12  | 0.61 | 0.82 | 0.37 | 0.72 | 0.18 | 0.93 | 0.75 | 0.88 | 0.33 | AC129230 | NA                                                                             |
| ESTB0107V_894                  | 1.12 | 0.21 | 1.89 | 0.01 | 1.89 | 0.01 | 0.53  | 0.03 | 0.73 | 0.13 | 0.77 | 0.13 | 0.83 | 0.09 | 0.83 | 0.09 | AY324884 | carbohydrate transporter/sugar porter (Arabidopsis thaliana)                   |
| MCR02624C1_1133                | 1.83 | 0.00 | 1.56 | 0.03 | 1.58 | 0.04 | 1.30  | 0.16 | 0.77 | 0.18 | 0.63 | 0.06 | 0.71 | 0.13 | 0.60 | 0.05 | BT014055 | RNA binding motif RNP-1 (RNA recognition motif) (Medicago truncatula)          |
| MCR01462C1_124                 | 1.28 | 0.00 | 1.24 | 0.01 | 1.24 | 0.01 | 1.24  | 0.01 | 1.24 | 0.01 | 1.24 | 0.01 | 1.24 | 0.01 | 1.24 | 0.01 | NA       | NA                                                                             |
| MCR011293C1_622                | 1.77 | 0.01 | 1.59 | 0.19 | 1.21 | 0.30 | 1.55  | 0.07 | 0.69 | 0.15 | 0.69 | 0.26 | 0.86 | 0.52 | 0.22 | 0.24 | NA       | NA                                                                             |
| MCR02821C1_737                 | 1.50 | 0.02 | 1.67 | 0.09 | 1.37 | 0.18 | 1.81  | 0.01 | 0.39 | 0.00 | 0.84 | 0.41 | 0.87 | 0.04 | 0.81 | 0.03 | AP092939 | Os06g0125400 (Xenopus salvia (african cuttlefish))                             |
| MCR011605C1_495                | 1.07 | 0.00 | 1.59 | 0.00 | 1.59 | 0.00 | 1.59  | 0.00 | 0.81 | 0.00 | 0.72 | 0.07 | 0.71 | 0.14 | 0.73 | 0.03 | AY224824 | hypochlorite protein (Arabidopsis thaliana)                                    |
| MCR011274C2_403                | 1.58 | 0.01 | 1.51 | 0.06 | 1.88 | 0.05 | 1.52  | 0.11 | 0.59 | 0.06 | 0.79 | 0.14 | 0.69 | 0.10 | 0.63 | 0.02 | NA       | NA                                                                             |
| MCR02007C1_1289                | 1.11 | 0.11 | 0.64 | 0.07 | 1.19 | 0.03 | 1.19  | 0.03 | 0.69 | 0.00 | 0.69 | 0.00 | 0.69 | 0.00 | 0.69 | 0.00 | BT013014 | endoneurite/serum ion binding (Arabidopsis thaliana)                           |
| MCR011003C1_714                | 1.83 | 0.01 | 1.18 | 0.30 | 1.43 | 0.04 | 1.47  | 0.06 | 0.62 | 0.04 | 0.58 | 0.02 | 0.77 | 0.17 | 0.95 | 0.48 | AM454907 | RNA binding / oxidoreductase III (Arabidopsis thaliana)                        |
| MCR011202C1_3562               | 2.52 | 0.00 | 2.36 | 0.00 | 2.13 | 0.00 | 0.78  | 0.12 | 0.92 | 0.54 | 0.92 | 0.48 | 0.90 | 0.32 | 0.55 | 0.02 | AM47963  | ATPase/E1ATZMP: metalloendopeptidase (Arabidopsis thaliana)                    |
| ESTB0131H_343                  | 1.38 | 0.02 | 1.95 | 0.02 | 1.90 | 0.01 | 1.90  | 0.01 | 0.27 | 0.00 | 0.27 | 0.00 | 0.27 | 0.00 | 0.27 | 0.00 | CT100458 | unknown protein (Arabidopsis thaliana)                                         |
| MCR01196C1_1044                | 0.90 | 0.33 | 3.55 | 0.00 | 3.38 | 0.04 | 13.49 | 0.00 | 0.20 | 0.00 | 0.23 | 0.00 | 0.30 | 0.00 | 1.12 | 0.42 | NA       | unknown (Solanum tuberosum)                                                    |
| MCR0164C1_610                  | 1.89 | 0.00 | 4.89 | 0.01 | 2.13 | 0.01 | 0.69  | 0.07 | 0.69 | 0.13 | 1.12 | 0.12 | 0.65 | 0.07 | 0.65 | 0.12 | AY42179  | lysine isomerase 2                                                             |
| MCR0807C1_503                  | 1.33 | 0.15 | 1.47 | 0.04 | 1.56 | 0.01 | 1.16  | 0.54 | 0.84 | 0.23 | 0.61 | 0.02 | 0.77 | 0.17 | 0.75 | 0.12 | U69633   | NA                                                                             |
| MCR01180C2_1138                | 1.47 | 0.01 | 1.11 | 0.45 | 1.99 | 0.09 | 1.50  | 0.40 | 0.72 | 0.10 | 0.44 | 0.07 | 0.72 | 0.14 | 0.47 | 0.05 | NA       | hypochlorite protein (Arabidopsis thaliana)                                    |
| bl_mfxxx00100053m_scd_85       | 2.11 | 0.02 | 1.91 | 0.02 | 1.91 | 0.02 | 0.99  | 0.90 | 0.80 | 0.42 | 0.67 | 0.02 | 0.67 | 0.02 | 0.72 | 0.22 | NA       | NA2 superfamily tyrosinase subfamily A, member 3 (Medicago truncatula)         |
| 171509AF_scd_272               | 2.69 | 0.00 | 2.18 | 0.10 | 1.95 | 0.01 | 1.33  | 0.40 | 0.78 | 0.40 | 0.54 | 0.39 | 0.69 | 0.33 | 0.56 | 0.33 | NA       | NA                                                                             |
| bl_mfxxx0054107m_scd_18        | 1.89 | 0.00 | 2.48 | 0.01 | 2.48 | 0.01 | 2.48  | 0.01 | 0.42 | 0.00 | 0.42 | 0.00 | 0.42 | 0.00 | 0.42 | 0.00 | NA       | NA                                                                             |
| MCR0287C1_53                   | 1.04 | 0.74 | 1.30 | 0.14 | 1.67 | 0.02 | 2.00  | 0.00 | 0.69 | 0.03 | 0.63 | 0.05 | 0.78 | 0.05 | 0.81 | 0.29 | AC140022 | hypochlorite protein MDRAF1_AC140022/230 (Medicago truncatula)                 |
| MCR01645C1_450                 | 1.16 | 0.18 | 1.22 | 0.   |      |      |       |      |      |      |      |      |      |      |      |      |          |                                                                                |

|                                |      |      |      |      |      |      |      |      |      |      |      |      |      |      |      |      |          |                                                                                           |
|--------------------------------|------|------|------|------|------|------|------|------|------|------|------|------|------|------|------|------|----------|-------------------------------------------------------------------------------------------|
| MCR04866.C2_731                | 1.10 | 0.43 | 1.22 | 0.17 | 1.43 | 0.03 | 1.33 | 0.07 | 0.74 | 0.16 | 0.61 | 0.02 | 0.61 | 0.17 | 0.69 | 0.09 | BT013298 | zinc finger protein LSD1 (Brassica oleracea)                                              |
| MCR01081.C5_616                | 2.18 | 0.01 | 2.29 | 0.00 | 2.29 | 0.02 | 2.29 | 0.26 | 0.48 | 0.01 | 0.72 | 0.09 | 0.59 | 0.17 | 0.69 | 0.35 | NA       |                                                                                           |
| STRMS20V_344                   | 1.55 | 0.01 | 1.51 | 0.06 | 1.56 | 0.00 | 1.56 | 0.08 | 0.76 | 0.21 | 0.55 | 0.01 | 0.75 | 0.07 | 0.64 | 0.02 | NA       | hydroethereal protein BmatM064 (Brassica napus)                                           |
| bf_ncdxxxx_0031a0503m.scf_517  | 1.18 | 0.11 | 1.18 | 0.26 | 2.00 | 0.00 | 1.24 | 0.18 | 0.54 | 0.08 | 0.36 | 0.00 | 0.76 | 0.24 | 0.52 | 0.04 | BA000042 | hypothetical protein NtAmB04 (Nicotiana glauca)                                           |
| MCR01874.C1_882                | 0.82 | 0.07 | 1.29 | 0.06 | 1.27 | 0.03 | 1.27 | 0.00 | 0.66 | 0.04 | 0.76 | 0.07 | 0.71 | 0.04 | 1.07 | 0.68 | NA       | hypothetical protein Os_100906 (Oryza sativa japonica cultivar-group)                     |
| MCR02793.C1_804                | 1.13 | 0.45 | 1.30 | 0.09 | 1.68 | 0.00 | 2.81 | 0.00 | 0.62 | 0.02 | 1.03 | 0.89 | 0.59 | 0.00 | 0.50 | 0.00 | AB212933 | NA                                                                                        |
| CR034827M_482                  | 1.60 | 0.01 | 1.51 | 0.08 | 1.39 | 0.07 | 1.59 | 0.08 | 0.48 | 0.05 | 0.49 | 0.11 | 0.61 | 0.20 | 0.54 | 0.27 | DQ245385 | unknown protein (Arabidopsis thaliana)                                                    |
| POCAF10V_554                   | 1.07 | 0.64 | 2.31 | 0.01 | 2.06 | 0.03 | 7.01 | 0.00 | 0.38 | 0.00 | 0.37 | 0.01 | 0.41 | 0.00 | 0.99 | 0.95 | NA       |                                                                                           |
| MCR04911.C1_1244               | 4.08 | 0.00 | 5.86 | 0.00 | 4.40 | 0.00 | 3.15 | 0.01 | 0.23 | 0.00 | 0.32 | 0.01 | 0.39 | 0.00 | 0.29 | 0.00 | NA       |                                                                                           |
| STRMS20V_441                   | 1.13 | 0.27 | 1.10 | 0.31 | 1.42 | 0.01 | 1.76 | 0.01 | 0.46 | 0.08 | 0.45 | 0.10 | 0.38 | 0.04 | 0.56 | 0.00 | NA       | isoprenyl resistance protein E (Lycopersicon esculentum)                                  |
| MCR02042.C2_664                | 1.20 | 0.08 | 1.25 | 0.23 | 1.24 | 0.14 | 1.12 | 0.45 | 0.86 | 0.35 | 0.84 | 0.33 | 0.91 | 0.54 | 0.74 | 0.97 | NA       |                                                                                           |
| bf_ncdxxxx_00517a0413m.scf_365 | 1.84 | 0.00 | 1.70 | 0.01 | 1.37 | 0.05 | 1.05 | 0.71 | 0.52 | 0.02 | 0.58 | 0.03 | 0.51 | 0.01 | 0.54 | 0.11 | NA       | unknown protein (Arabidopsis thaliana)                                                    |
| MCR08878.C5_322                | 1.80 | 0.04 | 1.39 | 0.07 | 2.13 | 0.00 | 1.20 | 0.13 | 0.54 | 0.03 | 0.40 | 0.01 | 0.56 | 0.03 | 0.35 | 0.02 | BT012792 | cutinase glucosylase (Datura innoxiosa)                                                   |
| MCR01649.C1_251                | 3.31 | 0.02 | 3.81 | 0.00 | 2.75 | 0.00 | 0.98 | 0.89 | 0.73 | 0.29 | 0.75 | 0.11 | 0.81 | 0.25 | 0.37 | 0.03 | NA       |                                                                                           |
| MCR01081.C1_1                  | 1.53 | 0.05 | 1.32 | 0.25 | 1.86 | 0.00 | 1.64 | 0.02 | 0.99 | 0.08 | 0.56 | 0.01 | 0.74 | 0.33 | 0.79 | 0.10 | AM72509  | hypothetical protein MtGRAFT_AC1466834702 (Medicago truncatula)                           |
| bf_ncdxxxx_00570a0413m.scf_616 | 1.30 | 0.04 | 1.50 | 0.32 | 1.54 | 0.02 | 1.97 | 0.01 | 0.67 | 0.10 | 0.72 | 0.36 | 0.76 | 0.21 | 0.77 | 0.49 | AM75541  | carbohydrate transporter/sugar cofactor (Arabidopsis thaliana)                            |
| MCR01878.C1_603                | 1.80 | 0.29 | 1.80 | 0.01 | 3.85 | 0.00 | 4.34 | 0.00 | 0.66 | 0.21 | 0.45 | 0.03 | 0.78 | 0.18 | 0.61 | 0.02 | DQ26252  | ATP binding / RNA ligase / trypsin-RNA ligase (Arabidopsis thaliana)                      |
| MCR016148.C1_460               | 1.45 | 0.02 | 1.50 | 0.01 | 1.77 | 0.01 | 1.15 | 0.42 | 0.49 | 0.52 | 0.72 | 0.13 | 0.73 | 0.15 | 0.89 | 0.62 | NA       |                                                                                           |
| MCR02427.C3_1465               | 4.92 | 0.00 | 5.48 | 0.01 | 3.81 | 0.00 | 0.95 | 0.62 | 0.94 | 0.60 | 0.87 | 0.61 | 0.80 | 0.09 | 0.36 | 0.00 | AK228936 | acetate/methyltransferase precursor (Vigna radiata var. radiata)                          |
| MCR017629_1                    | 2.48 | 0.00 | 3.00 | 0.00 | 3.10 | 0.00 | 1.75 | 0.01 | 0.44 | 0.01 | 0.48 | 0.01 | 0.48 | 0.02 | 0.48 | 0.01 | NA       | hypothetical protein MtGRAFT_AC131510a17 (Medicago truncatula)                            |
| MCR0347.C31_670                | 1.20 | 0.21 | 1.36 | 0.34 | 1.71 | 0.07 | 1.87 | 0.03 | 0.40 | 0.01 | 0.48 | 0.01 | 0.63 | 0.08 | 1.00 | 1.00 | NA       | Et/Som-like transposon proteins- Putative chlamy transposon protein (Medicago truncatula) |
| STRMS20V_212                   | 1.80 | 0.88 | 1.29 | 0.63 | 1.22 | 0.46 | 2.00 | 0.01 | 0.72 | 0.17 | 0.78 | 0.36 | 0.80 | 0.25 | 0.85 | 0.69 | BT013831 | putative protein (Arabidopsis thaliana)                                                   |
| MCR03285.C1_1812               | 2.58 | 0.01 | 2.43 | 0.00 | 2.61 | 0.00 | 1.51 | 0.03 | 0.44 | 0.03 | 0.44 | 0.03 | 0.45 | 0.03 | 0.32 | 0.05 | AB050509 | BtA1/Spo11-like protein BS14 (Nicotiana glauca)                                           |
| MCR013823.C1_1872              | 1.08 | 0.78 | 2.13 | 0.00 | 2.43 | 0.04 | 2.41 | 0.13 | 0.18 | 0.00 | 0.43 | 0.00 | 0.48 | 0.02 | 0.67 | 0.34 | AF038447 | beta-amylase PCT-BMW (Solanum tuberosum)                                                  |
| MCR01081.C1_1                  | 1.41 | 0.04 | 2.92 | 0.00 | 1.84 | 0.01 | 1.39 | 0.02 | 0.48 | 0.01 | 0.66 | 0.01 | 0.68 | 0.02 | 0.61 | 0.10 | AP009300 | NA                                                                                        |
| MCR010128.C1_668               | 1.26 | 0.10 | 1.95 | 0.01 | 2.11 | 0.00 | 2.02 | 0.00 | 0.71 | 0.08 | 0.83 | 0.27 | 0.89 | 0.34 | 0.64 | 0.07 | NA       | unassigned protein (Arabidopsis thaliana)                                                 |
| MCR01786.C2_1118               | 3.83 | 0.03 | 2.41 | 0.00 | 2.87 | 0.00 | 1.49 | 0.06 | 0.42 | 0.02 | 0.28 | 0.03 | 0.34 | 0.03 | 0.17 | 0.08 | Y14810   | carotene beta-hydroxylase (Lycopersicon esculentum)                                       |
| MCR07821.C1_682                | 1.20 | 0.23 | 1.55 | 0.03 | 1.29 | 0.12 | 1.35 | 0.16 | 0.78 | 0.24 | 0.77 | 0.14 | 0.84 | 0.35 | 0.54 | 0.21 | NA       |                                                                                           |
| MCR02345.C2_1350               | 1.21 | 0.18 | 1.76 | 0.02 | 1.11 | 0.53 | 1.07 | 0.73 | 0.80 | 0.35 | 0.86 | 0.53 | 0.62 | 0.50 | 0.61 | 0.21 | BA000042 | NA                                                                                        |
| STRMS20V_607                   | 1.14 | 0.32 | 1.28 | 0.36 | 1.53 | 0.37 | 1.72 | 0.00 | 0.87 | 0.49 | 0.78 | 0.41 | 0.81 | 0.48 | 0.84 | 0.97 | NA       | Protein kinase (Medicago truncatula)                                                      |
| MCR013762.C1_634               | 1.78 | 0.00 | 1.91 | 0.03 | 1.44 | 0.05 | 1.99 | 0.69 | 0.42 | 0.03 | 0.35 | 0.04 | 0.34 | 0.05 | 0.20 | 0.07 | NA       | Os07g0538800 (Oryza sativa japonica cultivar-group)                                       |
| STRMS20V_478                   | 2.68 | 0.10 | 2.88 | 0.14 | 1.39 | 0.04 | 1.55 | 0.04 | 0.58 | 0.03 | 0.75 | 0.15 | 0.69 | 0.09 | 0.71 | 0.16 | BT014027 | Shim-char, deoxyribose/ribose/uracilase SCW (Medicago truncatula)                         |
| ACDAD041009.T3m.scf_101        | 2.08 | 0.08 | 1.63 | 0.06 | 2.05 | 0.00 | 2.05 | 0.00 | 0.47 | 0.13 | 0.46 | 0.04 | 0.22 | 0.01 | 0.59 | 0.08 | AK224664 | NA                                                                                        |
| SDNN0812a.scf_262              | 1.34 | 0.14 | 1.88 | 0.01 | 1.61 | 0.01 | 1.80 | 0.02 | 0.38 | 0.01 | 0.47 | 0.08 | 0.52 | 0.06 | 0.53 | 0.00 | DQ773980 | cutinase RNA-binding protein (Anemone nemorosa)                                           |
| MCR014878.C1_863               | 1.74 | 0.01 | 1.33 | 0.04 | 1.44 | 0.02 | 0.93 | 0.56 | 1.00 | 1.00 | 0.93 | 0.62 | 0.74 | 0.77 | 0.51 | 0.04 | AY055596 | unknown protein (Arabidopsis thaliana)                                                    |
| MCR018930.C1_469               | 2.27 | 0.00 | 1.05 | 0.77 | 2.39 | 0.02 | 1.26 | 0.19 | 0.53 | 0.02 | 0.52 | 0.02 | 0.71 | 0.15 | 0.43 | 0.11 | AM113866 | Os03g0360700 (Oryza sativa japonica cultivar-group)                                       |
| MCR013688.C1_616               | 1.43 | 0.04 | 2.48 | 0.00 | 2.49 | 0.03 | 5.11 | 0.00 | 0.49 | 0.10 | 0.61 | 0.01 | 0.68 | 0.07 | 0.69 | 0.05 | DQ284486 | putative protein (Nicotiana glauca)                                                       |
| MCR03374.C2_630                | 2.04 | 0.00 | 1.63 | 0.02 | 1.58 | 0.02 | 1.30 | 0.19 | 0.59 | 0.56 | 0.87 | 0.16 | 0.60 | 0.07 | 0.45 | 0.10 | NA       | PS01_12 (Arabidopsis thaliana)                                                            |
| MCR02926.C1_1237               | 1.49 | 0.01 | 1.10 | 0.71 | 1.65 | 0.01 | 1.97 | 0.00 | 0.87 | 0.29 | 0.66 | 0.19 | 0.78 | 0.10 | 0.65 | 0.02 | BT013818 | MS15C1.4 (Oryza sativa indica cultivar-group)                                             |
| STRMS20V_201                   | 1.64 | 0.01 | 1.47 | 0.12 | 1.85 | 0.01 | 1.51 | 0.07 | 0.56 | 0.06 | 0.74 | 0.22 | 0.69 | 0.21 | 0.73 | 0.26 | NA       | Protein kinase (Medicago truncatula)                                                      |
| MCR01781.C1_621                | 1.26 | 0.20 | 1.39 | 0.10 | 1.50 | 0.01 | 1.76 | 0.01 | 0.54 | 0.02 | 0.70 | 0.09 | 0.73 | 0.10 | 0.84 | 0.40 | AP009287 | unassigned protein (Arabidopsis thaliana)                                                 |
| MCR027208.C2_222               | 1.23 | 0.13 | 1.75 | 0.03 | 1.29 | 0.14 | 1.29 | 0.00 | 0.35 | 0.02 | 0.72 | 0.28 | 0.52 | 0.08 | 0.30 | 0.25 | BT012787 | hypothetical protein Os_100906 (Oryza sativa indica cultivar-group)                       |
| bf_ncdxxxx_003a00303m.scf_581  | 1.29 | 0.05 | 1.46 | 0.05 | 1.47 | 0.02 | 1.14 | 0.32 | 0.69 | 0.03 | 0.80 | 0.21 | 0.75 | 0.10 | 0.63 | 0.04 | NA       | disease resistance protein BS2 (Nicotiana glauca)                                         |
| MCR02775.C1_862                | 2.52 | 0.00 | 2.14 | 0.01 | 1.22 | 0.08 | 1.18 | 0.65 | 0.45 | 0.04 | 0.88 | 0.28 | 0.45 | 0.02 | 0.27 | 0.12 | DQ284473 | cytochrome P450 (Solanum tuberosum)                                                       |
| MCR01081.C1_88                 | 1.16 | 0.24 | 1.53 | 0.06 | 1.21 | 0.18 | 1.17 | 0.30 | 0.51 | 0.01 | 0.66 | 0.16 | 0.62 | 0.06 | 0.80 | 0.31 | NA       | NA                                                                                        |
| BF_TUBSXXX_0021FD1_T3M_SCF_160 | 1.31 | 0.30 | 1.55 | 0.02 | 1.68 | 0.02 | 1.68 | 0.00 | 0.60 | 0.02 | 0.68 | 0.01 | 0.56 | 0.00 | 0.62 | 0.13 | AM686279 | NA                                                                                        |
| bf_ncdxxxx_0007G11_03m.scf_524 | 1.83 | 0.01 | 2.29 | 0.01 | 1.88 | 0.01 | 1.14 | 0.36 | 0.51 | 0.02 | 0.44 | 0.01 | 0.60 | 0.09 | 0.48 | 0.02 | NA       |                                                                                           |
| MCR018106.C1_502               | 1.98 | 0.00 | 1.69 | 0.02 | 1.61 | 0.01 | 0.90 | 0.63 | 0.86 | 0.58 | 0.97 | 0.80 | 0.64 | 0.08 | 0.24 | 0.00 | AB211520 | similar to ATP synthase subunit H protein (Solanum tuberosum)                             |
| MCR02772.C2_1399               | 1.36 | 0.07 | 1.85 | 0.01 | 1.68 | 0.01 | 1.86 | 0.04 | 0.41 | 0.00 | 0.50 | 0.01 | 0.44 | 0.00 | 0.32 | 0.01 | AF193845 | branched-chain amino acid aminotransferase (Solanum tuberosum)                            |
| SDNN0506u.scf_606              | 1.24 | 0.12 | 1.13 | 0.51 | 1.64 | 0.01 | 2.40 | 0.00 | 0.52 | 0.06 | 0.68 | 0.01 | 0.77 | 0.26 | 0.71 | 0.30 | NA       | NA                                                                                        |
| MCR04501.C1_671                | 0.94 | 0.67 | 1.22 | 0.26 | 1.53 | 0.02 | 1.66 | 0.01 | 0.56 | 0.01 | 0.78 | 0.15 | 0.79 | 0.20 | 0.63 | 0.03 | NA       | isocontig resistance protein C beta (Lycopersicon esculentum)                             |
| MCR013308.C1_1493              | 2.34 | 0.04 | 2.28 | 0.01 | 1.87 | 0.04 | 0.88 | 0.67 | 0.91 | 0.71 | 0.90 | 0.63 | 0.71 | 0.38 | 0.39 | 0.16 | Y10839   | hypothetical protein Os_100814 (Oryza sativa indica cultivar-group)                       |
| MCR012202.C1_803               | 0.97 | 0.82 | 1.14 | 0.47 | 1.14 | 0.38 | 1.27 | 0.36 | 0.72 | 0.27 | 0.93 | 0.69 | 0.99 | 0.87 | 0.87 | 0.56 | CU010621 | AAA1Phase (Medicago truncatula)                                                           |
| MCR04876.C2_1351               | 1.06 | 0.66 | 1.43 | 0.04 | 1.27 | 0.06 | 1.80 | 0.01 | 0.41 | 0.00 | 0.46 | 0.00 | 0.51 | 0.00 | 1.08 | 0.75 | NA       | expressed protein (Arabidopsis thaliana)                                                  |

| Probe ID                       | Harvest 1  |              | Harvest 2  |              | Harvest 3  |              | Harvest 4  |              | Harvest 5  |              | Harvest 6  |              | Harvest 7  |              | Genebank | Description |                                                                           |          |
|--------------------------------|------------|--------------|------------|--------------|------------|--------------|------------|--------------|------------|--------------|------------|--------------|------------|--------------|----------|-------------|---------------------------------------------------------------------------|----------|
|                                | Normalized | Log2 P-value |          |             |                                                                           |          |
| MICRO 8260.C1_490              | 0.53       | 0.01         | 0.62       | 0.02         | 0.57       | 0.02         | 0.71       | 0.13         | 1.18       | 0.08         | 1.26       | 0.19         | 1.52       | 0.08         | 1.32     | 0.15        | TEJ <sub>1</sub> poly(ADP-ribose) glycohydrolase [Arabidopsis thaliana]   |          |
| MICRO 1913.C1_1686             | 0.21       | 0.00         | 0.28       | 0.01         | 0.22       | 0.00         | 0.43       | 0.02         | 2.96       | 0.00         | 3.02       | 0.02         | 3.15       | 0.00         | 1.76     | 0.02        | NU 127791                                                                 |          |
| MICRO 2286.C2_873              | 0.17       | 0.01         | 0.19       | 0.01         | 0.22       | 0.01         | 0.15       | 0.01         | 1.54       | 0.03         | 1.49       | 0.03         | 1.94       | 0.03         | 1.84     | 0.03        | Os11g0671300 (Oryza sativa [ japonica cultivar-group])                    |          |
| BF_mfxxxx_0054412.13m.scf_33   | 0.49       | 0.00         | 0.81       | 0.02         | 0.40       | 0.01         | 0.78       | 0.10         | 1.93       | 0.07         | 1.16       | 0.28         | 0.87       | 0.89         | 1.44     | 0.98        | AC149801                                                                  |          |
| MICRO 2317.C1_560              | 1.00       | 0.00         | 0.62       | 0.03         | 0.95       | 0.28         | 0.96       | 0.01         | 1.53       | 0.04         | 1.27       | 0.24         | 1.84       | 0.01         | 1.07     | 0.64        | NA                                                                        |          |
| BF_mfxxxx_0040903.13m.scf_41   | 0.34       | 0.01         | 0.26       | 0.01         | 0.24       | 0.01         | 0.72       | 0.18         | 1.06       | 0.26         | 0.72       | 0.18         | 1.70       | 0.27         | 1.56     | 0.27        | unknown protein [Arabidopsis thaliana]                                    |          |
| MICRO 14409.C1_894             | 0.45       | 0.00         | 0.51       | 0.02         | 0.72       | 0.21         | 0.69       | 0.09         | 3.65       | 0.00         | 2.71       | 0.00         | 3.40       | 0.00         | 1.67     | 0.04        | NA                                                                        |          |
| MICRO 438.C1_1653              | 0.85       | 0.10         | 0.66       | 0.01         | 0.73       | 0.01         | 0.78       | 0.18         | 1.43       | 0.04         | 1.38       | 0.11         | 1.11       | 0.11         | 0.57     | 2.63        | 0.00                                                                      | BT013857 |
| MICRO 5059.C1_1144             | 0.50       | 0.03         | 0.69       | 0.03         | 0.69       | 0.11         | 0.76       | 0.15         | 1.90       | 0.01         | 1.64       | 0.01         | 1.87       | 0.01         | 1.87     | 0.01        | NA                                                                        |          |
| BF_mfxxxx_0031033.13m.scf_102  | 0.07       | 0.00         | 0.05       | 0.01         | 0.04       | 0.01         | 0.14       | 0.03         | 1.37       | 0.11         | 2.26       | 0.04         | 1.86       | 0.01         | 4.55     | 0.00        | NA                                                                        |          |
| MICRO 7929.C2_136              | 0.07       | 0.01         | 0.12       | 0.01         | 0.04       | 0.01         | 0.19       | 0.03         | 3.79       | 0.02         | 4.09       | 0.00         | 3.61       | 0.03         | 3.18     | 0.06        | NA                                                                        |          |
| BF_mfxxxx_0052938.13m.scf_68   | 0.14       | 0.01         | 0.27       | 0.00         | 0.60       | 0.00         | 0.14       | 0.00         | 4.07       | 0.00         | 2.78       | 0.07         | 3.02       | 0.03         | 3.73     | 0.09        | NA                                                                        |          |
| ACDAG436307.13m.scf_562        | 0.43       | 0.00         | 0.61       | 0.09         | 0.69       | 0.06         | 0.97       | 1.02         | 0.89       | 1.18         | 0.56       | 1.44         | 0.55       | 1.55         | 0.95     | NA          | hypothetical protein Os1_000005 (Oryza sativa [ indica cultivar-group])   |          |
| MICRO 9106.C7_745              | 0.65       | 0.08         | 0.66       | 0.03         | 0.90       | 0.47         | 0.57       | 0.02         | 2.87       | 0.00         | 1.80       | 0.02         | 2.47       | 0.00         | 1.15     | 0.43        | AB061243                                                                  |          |
| MICRO 2633.C1_702              | 0.96       | 0.04         | 0.84       | 0.07         | 0.89       | 0.09         | 0.86       | 0.46         | 1.84       | 0.02         | 1.39       | 0.07         | 1.39       | 0.14         | 1.21     | 0.41        | AB040485                                                                  |          |
| STRK27171_77                   | 0.27       | 0.00         | 0.48       | 0.11         | 0.43       | 0.03         | 0.46       | 0.29         | 1.32       | 0.14         | 1.78       | 0.02         | 1.99       | 0.70         | 1.39     | 0.38        | NA                                                                        |          |
| BF_TUBSXXX_0042003.T3M.SCF_269 | 0.25       | 0.01         | 0.42       | 0.04         | 0.24       | 0.04         | 1.26       | 0.14         | 0.85       | 0.36         | 1.43       | 0.34         | 1.55       | 0.38         | 5.14     | 0.00        | NA                                                                        |          |
| ACDAG0204906.13m.scf_410       | 0.82       | 0.07         | 0.78       | 0.19         | 0.85       | 0.08         | 0.62       | 0.10         | 1.31       | 0.14         | 1.42       | 0.08         | 1.19       | 0.39         | 1.50     | 0.41        | NA                                                                        |          |
| STRK2071_432                   | 0.34       | 0.00         | 0.42       | 0.02         | 0.43       | 0.10         | 0.76       | 0.28         | 1.06       | 0.81         | 1.26       | 0.12         | 1.34       | 0.07         | 1.32     | 0.48        | NA                                                                        |          |
| MICRO 5849.C3_725              | 0.54       | 0.02         | 0.71       | 0.09         | 0.97       | 0.86         | 1.55       | 0.17         | 1.40       | 0.04         | 1.47       | 0.04         | 1.77       | 0.01         | 1.77     | 0.01        | AC151801                                                                  |          |
| POACH7077_81                   | 0.63       | 0.03         | 0.86       | 0.11         | 0.82       | 0.29         | 0.84       | 0.74         | 1.06       | 0.70         | 1.19       | 0.30         | 1.20       | 0.37         | 1.69     | 0.02        | NM_102111                                                                 |          |
| MICRO 1643.C8_866              | 0.23       | 0.00         | 0.29       | 0.01         | 0.24       | 0.00         | 0.52       | 0.03         | 1.98       | 0.01         | 3.78       | 0.00         | 2.87       | 0.07         | 7.04     | 0.00        | NA                                                                        |          |
| TBRK0203FB05.13m.scf_117       | 0.81       | 0.00         | 0.08       | 0.00         | 0.08       | 0.00         | 0.26       | 0.00         | 2.20       | 0.00         | 2.51       | 0.00         | 3.82       | 0.00         | 10.92    | 0.00        | NA                                                                        |          |
| BPL5E207H_63                   | 0.02       | 0.00         | 0.03       | 0.00         | 0.05       | 0.01         | 0.09       | 0.01         | 2.43       | 0.00         | 3.86       | 0.00         | 5.07       | 0.00         | 11.70    | 0.00        | NA                                                                        |          |
| MICRO 339.C9_1241              | 0.07       | 0.00         | 0.21       | 0.02         | 0.17       | 0.02         | 0.58       | 0.05         | 1.47       | 0.08         | 1.88       | 0.01         | 1.73       | 0.01         | 3.98     | 0.01        | NA                                                                        |          |
| MICRO 1081.C57_303             | 0.33       | 0.01         | 0.48       | 0.32         | 0.41       | 0.01         | 0.31       | 0.05         | 2.31       | 0.02         | 3.45       | 0.04         | 3.22       | 0.01         | 3.19     | 0.00        | NA                                                                        |          |
| POACH7077_369                  | 0.25       | 0.01         | 0.26       | 0.03         | 0.32       | 0.01         | 0.38       | 0.12         | 3.68       | 0.00         | 2.48       | 0.00         | 2.39       | 0.01         | 1.65     | 0.07        | NA                                                                        |          |
| MICRO 10015.C1_1103            | 0.14       | 0.01         | 0.03       | 0.01         | 0.42       | 0.01         | 0.64       | 0.15         | 1.63       | 0.01         | 1.55       | 0.01         | 1.58       | 0.01         | 1.84     | 0.01        | NA                                                                        |          |
| BF_mfxxxx_0034405.17m.scf_21   | 0.15       | 0.01         | 0.22       | 0.04         | 0.02       | 0.06         | 0.28       | 0.06         | 2.00       | 0.49         | 0.00       | 4.06         | 0.00       | 1.77         | 0.23     | AF006079    |                                                                           |          |
| MICRO 8096.C3_21               | 0.26       | 0.00         | 0.36       | 0.01         | 0.25       | 0.01         | 0.36       | 0.04         | 1.91       | 0.01         | 2.07       | 0.00         | 2.09       | 0.01         | 1.53     | 0.09        | NA                                                                        |          |
| MICRO 8098.C1_857              | 0.37       | 0.07         | 0.42       | 0.02         | 0.63       | 0.03         | 0.62       | 0.02         | 3.62       | 0.01         | 4.56       | 0.01         | 4.56       | 0.11         | 3.81     | 0.11        | NA                                                                        |          |
| STRM327V_509                   | 0.27       | 0.02         | 0.34       | 0.04         | 0.17       | 0.04         | 0.67       | 0.32         | 1.95       | 0.27         | 1.62       | 0.04         | 1.87       | 0.03         | 1.84     | 0.03        | NA                                                                        |          |
| MICRO 3156.C9_1200             | 0.20       | 0.02         | 0.48       | 0.09         | 0.42       | 0.11         | 0.76       | 0.87         | 1.10       | 0.74         | 2.11       | 0.02         | 1.68       | 0.08         | 8.59     | 0.00        | CG284470                                                                  |          |
| BF_mfxxxx_0045020.13m.scf_202  | 0.28       | 0.08         | 0.49       | 0.07         | 0.65       | 0.03         | 0.68       | 0.13         | 1.57       | 0.02         | 1.62       | 0.02         | 1.65       | 0.02         | 1.62     | 0.43        | NA                                                                        |          |
| MICRO 8079.C1_751              | 0.04       | 0.01         | 0.15       | 0.02         | 0.07       | 0.01         | 0.25       | 0.06         | 1.78       | 0.01         | 2.08       | 0.00         | 1.84       | 0.01         | 2.06     | 0.02        | AC151801                                                                  |          |
| MICRO 4618.C1_1396             | 1.16       | 0.38         | 0.64       | 0.02         | 0.81       | 0.14         | 0.33       | 0.00         | 1.83       | 0.01         | 1.44       | 0.08         | 1.89       | 0.01         | 1.67     | 0.61        | AC137360                                                                  |          |
| BF_mfxxxx_0048024.13m.scf_18   | 0.02       | 0.00         | 0.04       | 0.00         | 0.04       | 0.00         | 0.18       | 0.04         | 1.68       | 0.01         | 1.71       | 0.00         | 1.70       | 0.00         | 2.71     | 0.00        | NA                                                                        |          |
| MICRO 432.C14_712              | 0.51       | 0.12         | 0.50       | 0.02         | 0.49       | 0.16         | 0.37       | 0.05         | 7.11       | 0.00         | 5.27       | 0.00         | 2.56       | 0.00         | 1.08     | 0.60        | NA                                                                        |          |
| STRM327V_522                   | 0.83       | 0.23         | 0.63       | 0.08         | 0.82       | 0.29         | 0.82       | 0.37         | 3.23       | 0.00         | 1.30       | 0.12         | 2.00       | 0.01         | 0.99     | 0.97        | AY303171                                                                  |          |
| BF_mfxxxx_0060610.13m.scf_500  | 0.25       | 0.00         | 0.20       | 0.00         | 0.17       | 0.00         | 0.27       | 0.00         | 2.94       | 0.00         | 2.36       | 0.00         | 2.45       | 0.00         | 2.77     | 0.00        | NA                                                                        |          |
| BF_mfxxxx_0050420.13m.scf_71   | 0.45       | 0.01         | 0.40       | 0.01         | 0.40       | 0.01         | 0.27       | 0.00         | 2.47       | 0.00         | 1.24       | 0.02         | 1.45       | 0.01         | 1.22     | 0.01        | AB124411                                                                  |          |
| MICRO 11344.C3_354             | 0.23       | 0.00         | 0.41       | 0.01         | 0.31       | 0.02         | 0.60       | 0.20         | 1.78       | 0.02         | 2.02       | 0.01         | 1.60       | 0.13         | 1.72     | 0.06        | AY196080                                                                  |          |
| BF_mfxxxx_007205.13m.scf_1     | 0.52       | 0.09         | 0.49       | 0.08         | 0.60       | 0.04         | 0.46       | 0.03         | 2.43       | 0.00         | 1.68       | 0.26         | 1.88       | 0.07         | 2.13     | 0.01        | NA                                                                        |          |
| MICRO 3971.C1_2941             | 0.28       | 0.01         | 0.38       | 0.01         | 0.38       | 0.01         | 0.24       | 0.02         | 3.84       | 0.00         | 2.92       | 0.01         | 1.51       | 0.04         | 1.90     | 0.04        | AY439028                                                                  |          |
| SDRN04D20u.scf_291             | 0.24       | 0.00         | 0.39       | 0.03         | 0.31       | 0.02         | 0.35       | 0.04         | 2.62       | 0.01         | 2.92       | 0.00         | 2.31       | 0.01         | 1.97     | 0.02        | NA                                                                        |          |
| MICRO 1643.C7_559              | 0.19       | 0.01         | 0.33       | 0.03         | 0.15       | 0.02         | 0.28       | 0.07         | 1.99       | 0.08         | 2.62       | 0.00         | 2.88       | 0.01         | 3.11     | 0.01        | NA                                                                        |          |
| MICRO 2980.C1_1571             | 0.20       | 0.01         | 0.21       | 0.00         | 0.36       | 0.01         | 0.90       | 0.02         | 1.86       | 0.01         | 2.18       | 0.00         | 2.10       | 0.01         | 2.01     | 0.01        | AC117236                                                                  |          |
| MICRO 26.C1_109                | 0.04       | 0.00         | 0.03       | 0.00         | 0.02       | 0.00         | 0.12       | 0.00         | 2.51       | 0.00         | 3.13       | 0.00         | 5.15       | 0.00         | 13.91    | 0.00        | AB148037                                                                  |          |
| BF_mfxxxx_0036811.13m.scf_111  | 0.69       | 0.03         | 0.77       | 0.18         | 0.88       | 0.41         | 0.87       | 0.37         | 1.18       | 0.25         | 1.37       | 0.09         | 1.81       | 0.00         | 1.79     | 0.01        | BT012736                                                                  |          |
| MICRO 7123.C1_894              | 0.32       | 0.01         | 0.32       | 0.01         | 0.31       | 0.01         | 0.31       | 0.01         | 1.37       | 0.01         | 1.15       | 0.22         | 1.18       | 0.10         | 1.15     | 0.22        | hypothetical protein Os1_007448 (Oryza sativa [ japonica cultivar-group]) |          |
| MICRO 1348.C1_584              | 0.67       | 0.03         | 0.78       | 0.20         | 0.77       | 0.13         | 0.83       | 0.30         | 1.20       | 0.22         | 1.20       | 0.44         | 1.26       | 0.13         | 1.22     | 0.30        | NA                                                                        |          |
| BF_mfxxxx_0036811.13m.scf_22   | 0.38       | 0.02         | 0.25       | 0.00         | 0.44       | 0.02         | 0.98       | 0.87         | 1.57       | 0.03         | 1.00       | 0.99         | 1.41       | 0.28         | 1.78     | 0.03        | AK224815                                                                  |          |
| MICRO 958.C1_89                | 0.11       | 0.04         | 0.04       | 0.01         | 0.07       | 0.02         | 0.72       | 0.12         | 7.02       | 0.00         | 1.78       | 0.02         | 1.12       | 0.01         | 1.76     | 0.01        | NA                                                                        |          |
| BF_mfxxxx_0066403.13m.scf_72   | 0.53       | 0.35         | 0.22       | 0.04         | 0.38       | 0.04         | 0.54       | 0.21         | 2.11       | 0.01         | 1.24       | 0.20         | 1.75       | 0.02         | 1.12     | 0.70        | AF009299                                                                  |          |
| BF_mfxxxx_0069811.13m.scf_463  | 0.46       | 0.00         | 0.43       | 0.00         | 0.60       | 0.01         | 0.66       | 0.02         | 2.56       | 0.00         | 2.32       | 0.08         | 2.48       | 0.01         | 3.21     | 0.01        | AC122484                                                                  |          |
| MICRO 2286.C40_64              | 0.22       | 0.00         | 0.26       | 0.01         | 0.26       | 0.01         | 0.74       | 0.18         | 2.62       | 0.00         | 2.12       | 0.00         | 2.17       | 0.00         | 2.01     | 0.01        | NA                                                                        |          |
| LS7B44N14H_269                 | 0.23       | 0.00         | 0.24       | 0.04         | 0.33       | 0.08         | 0.74       | 0.50         | 1.54       | 0.05         | 1.59       | 0.03         | 1.88       | 0.01         | 5.18     | 0.00        | CG350360                                                                  |          |
| BF_mfxxxx_0083411.17m.scf_306  | 0.90       | 0.81         | 0.52       | 0.01         | 0.61       | 0.01         | 0.68       | 0.03         | 1.58       | 0.22         | 1.80       | 0.07         | 2.56       | 0.06         | 3.78     | 0.04        | NA                                                                        |          |
| MICRO 8671.C1_703              | 0.38       | 0.00         | 0.38       | 0.00         | 0.62       | 0.03         | 0.62       | 0.04         | 1.62       | 0.02         | 1.62       | 0.02         | 1.62       | 0.02         | 1.34     | 0.02        | NA                                                                        |          |
| MICRO 5702.C2_644              | 0.55       | 0.02         | 0.63       | 0.05         | 0.71       | 0.05         | 0.93       | 0.85         | 1.38       | 0.15         | 1.30       | 0.16         | 1.47       | 0.05         | 1.81     | 0.04        | AC122164                                                                  |          |
| LS7B3A57H_247                  | 0.42       | 0.12         | 0.39       | 0.07         | 0.29       | 0.05         | 1.09       | 0.72         | 0.66       | 0.15         |            |              |            |              |          |             |                                                                           |          |

|                                 |      |      |      |      |      |      |      |      |       |      |      |      |      |      |       |      |           |                                                                                                            |
|---------------------------------|------|------|------|------|------|------|------|------|-------|------|------|------|------|------|-------|------|-----------|------------------------------------------------------------------------------------------------------------|
| MICRO332.C3_960                 | 0.77 | 0.21 | 0.85 | 0.34 | 0.61 | 0.02 | 0.32 | 0.39 | 0.01  | 2.00 | 1.43 | 1.40 | 1.30 | 0.09 | 1.14  | 0.50 | AY498744  | 40S ribosomal protein S5 (Capsicum annuum)                                                                 |
| STMIC247RB_443                  | 0.46 | 0.15 | 0.51 | 0.21 | 0.42 | 0.03 | 0.24 | 0.01 | 2.02  | 0.00 | 1.42 | 0.13 | 1.68 | 0.01 | 1.54  | 0.24 | AF496987  | BEL1-related homeotic protein 5 (Solanum tuberosum)                                                        |
| MICRO331.C29_82                 | 0.24 | 0.09 | 0.36 | 0.03 | 0.26 | 0.02 | 0.26 | 0.12 | 1.58  | 0.04 | 1.83 | 0.05 | 1.48 | 0.06 | 2.13  | 0.01 | AF269684  | NA                                                                                                         |
| STMAA87V_62                     | 0.26 | 0.00 | 0.35 | 0.01 | 0.27 | 0.01 | 0.35 | 0.05 | 11.42 | 0.00 | 9.06 | 0.00 | 6.74 | 0.00 | 2.05  | 0.01 | NA        | NA                                                                                                         |
| MICRO335.C2_1862                | 0.38 | 0.00 | 0.37 | 0.02 | 0.37 | 0.01 | 0.48 | 0.04 | 1.77  | 0.03 | 1.46 | 0.10 | 1.58 | 0.02 | 1.59  | 0.05 | AY182188  | ATPDL1-4 - electron transporter / isomerase / thiol-disulfide exchange intermediate [Arabidopsis thaliana] |
| MICRO1091.C2_442                | 0.10 | 0.03 | 0.19 | 0.01 | 0.14 | 0.00 | 0.11 | 0.00 | 3.08  | 0.01 | 3.01 | 0.01 | 3.00 | 0.01 | 4.31  | 0.01 | NA        | NA                                                                                                         |
| MICRO1437B.C1_1085              | 0.33 | 0.01 | 0.42 | 0.03 | 0.32 | 0.02 | 0.41 | 0.07 | 2.15  | 0.00 | 1.97 | 0.01 | 2.02 | 0.01 | 1.51  | 0.11 | AM454415  | protein binding [Arabidopsis thaliana]                                                                     |
| BF_LB359XXX_0054h03.13m.scf.601 | 0.87 | 0.41 | 0.65 | 0.14 | 0.64 | 0.10 | 0.57 | 0.19 | 2.48  | 0.00 | 1.61 | 0.06 | 1.51 | 0.08 | 1.62  | 0.03 | NA        | NA                                                                                                         |
| MICRO2611.C1_1504               | 0.27 | 0.02 | 0.31 | 0.01 | 0.20 | 0.01 | 0.24 | 0.04 | 3.78  | 0.01 | 3.71 | 0.01 | 3.87 | 0.01 | 1.38  | 0.01 | U58957    | Adenosine precursor (ATP-diphosphatase) (Adenosine diphosphatase) (ADPase) (ATP-diphosphatase)             |
| MICRO3036.C1_784                | 0.40 | 0.00 | 0.38 | 0.03 | 0.61 | 0.03 | 1.12 | 0.74 | 1.10  | 0.46 | 1.24 | 0.67 | 1.99 | 0.00 | 2.92  | 0.00 | NA        | Non-A-like (Medicago truncatula)                                                                           |
| MICRO2094.C4_349                | 0.35 | 0.01 | 0.59 | 0.05 | 0.79 | 0.05 | 1.02 | 0.90 | 1.20  | 0.30 | 1.15 | 0.60 | 1.32 | 0.54 | 1.89  | 0.00 | NA        | Phytidoyl-S-phosphate-dependent enzyme, beta subunit [Medicago truncatula]                                 |
| MICRO1268B.C1_446               | 0.20 | 0.00 | 0.28 | 0.01 | 0.49 | 0.01 | 0.49 | 0.06 | 2.15  | 0.02 | 2.63 | 0.04 | 2.11 | 0.01 | 2.87  | 0.01 | NA        | NA                                                                                                         |
| SDNBDNF29u.scf.610              | 0.35 | 0.00 | 0.32 | 0.02 | 0.50 | 0.00 | 0.58 | 0.05 | 2.14  | 0.00 | 1.70 | 0.01 | 1.65 | 0.01 | 1.63  | 0.03 | AF119940  | NA                                                                                                         |
| SSNDN20A79u.scf.489             | 0.18 | 0.01 | 0.28 | 0.07 | 0.14 | 0.03 | 0.18 | 0.14 | 1.52  | 0.07 | 2.68 | 0.00 | 1.93 | 0.01 | 3.65  | 0.00 | NA        | NA                                                                                                         |
| MICRO11487.C1_739               | 0.37 | 0.00 | 0.47 | 0.01 | 0.68 | 0.03 | 0.88 | 0.40 | 1.51  | 0.02 | 1.20 | 0.27 | 1.52 | 0.01 | 1.46  | 0.08 | AM428463  | Chloroplast35400 [Chrysa salina (epionica cultivar-group)]                                                 |
| MICRO187.C2_212                 | 0.10 | 0.00 | 0.16 | 0.00 | 0.34 | 0.08 | 1.60 | 0.07 | 0.84  | 0.73 | 2.59 | 0.21 | 6.64 | 0.00 | 29.08 | 0.00 | U73733    | NA                                                                                                         |
| BF_LB359XXX_0057e08.13m.scf.66  | 0.42 | 0.03 | 0.61 | 0.03 | 0.66 | 0.03 | 0.57 | 0.03 | 2.12  | 0.02 | 1.49 | 0.06 | 1.77 | 0.00 | 1.63  | 0.03 | AK224856  | unknown [Arabidopsis thaliana]                                                                             |
| BF_LB359XXX_0010h10.13m.scf.147 | 0.32 | 0.02 | 0.44 | 0.01 | 0.53 | 0.01 | 0.37 | 0.02 | 4.98  | 0.00 | 3.58 | 0.01 | 2.82 | 0.04 | 4.81  | 0.00 | DC241945  | NA                                                                                                         |
| MICRO2286.C2_189                | 0.06 | 0.00 | 0.14 | 0.00 | 0.63 | 0.00 | 0.14 | 0.01 | 4.10  | 0.00 | 3.81 | 0.00 | 3.81 | 0.00 | 2.54  | 0.00 | NA        | NA                                                                                                         |
| MICRO165.C11_970                | 0.44 | 0.00 | 0.47 | 0.00 | 0.66 | 0.03 | 0.69 | 0.30 | 1.83  | 0.00 | 1.38 | 0.05 | 1.81 | 0.00 | 2.47  | 0.00 | U75994    | SRE1b [Solanum tuberosum]                                                                                  |
| MICRO6224.C2_866                | 0.59 | 0.01 | 0.37 | 0.00 | 0.59 | 0.00 | 0.32 | 0.01 | 4.29  | 0.00 | 2.31 | 0.02 | 2.46 | 0.00 | 2.69  | 0.00 | DC274179  | Polyprotein, putative [Solanum demissum]                                                                   |
| MICRO1018a.C2_511               | 0.23 | 0.00 | 0.23 | 0.00 | 0.21 | 0.00 | 0.46 | 0.01 | 2.27  | 0.00 | 2.02 | 0.01 | 2.14 | 0.00 | 1.70  | 0.00 | NA        | NA                                                                                                         |
| LSTB45C12H_1                    | 0.45 | 0.00 | 0.59 | 0.03 | 0.55 | 0.01 | 1.08 | 0.65 | 1.30  | 0.09 | 1.30 | 0.10 | 0.87 | 0.40 | 1.56  | 0.05 | NA        | NA                                                                                                         |
| BF_LB359XXX_0012a02.17m.scf.610 | 0.48 | 0.05 | 0.51 | 0.12 | 0.31 | 0.00 | 0.84 | 0.06 | 2.47  | 0.00 | 2.09 | 0.01 | 1.85 | 0.02 | 1.86  | 0.01 | AM471678  | Actinidin-like [Medicago truncatula]                                                                       |
| BF_LB359XXX_0004f09.13m.scf.562 | 0.35 | 0.15 | 0.39 | 0.08 | 0.30 | 0.02 | 0.63 | 0.23 | 1.28  | 0.16 | 1.71 | 0.02 | 1.82 | 0.02 | 2.07  | 0.01 | NA        | NA                                                                                                         |
| BF_LB359XXX_0023a09.13m.scf.562 | 0.34 | 0.00 | 0.34 | 0.01 | 0.25 | 0.04 | 0.26 | 0.02 | 2.17  | 0.00 | 2.41 | 0.00 | 2.54 | 0.06 | 4.07  | 0.00 | NA        | calcium ion binding [Arabidopsis thaliana]                                                                 |
| MICRO752H.C1_769                | 0.71 | 0.04 | 0.80 | 0.18 | 0.89 | 0.38 | 0.94 | 0.85 | 1.38  | 0.06 | 1.36 | 0.05 | 1.36 | 0.08 | 1.95  | 0.01 | NA        | NA                                                                                                         |
| LSTB45H700                      | 0.83 | 0.19 | 0.44 | 0.01 | 0.54 | 0.15 | 0.44 | 0.03 | 6.60  | 0.00 | 2.88 | 0.01 | 2.53 | 0.00 | 1.04  | 0.74 | NA        | BiP/R [Medicago truncatula]                                                                                |
| BF_LB359XXX_0057e10.13m.scf.179 | 0.45 | 0.00 | 0.41 | 0.00 | 0.41 | 0.00 | 0.29 | 0.00 | 2.12  | 0.00 | 1.97 | 0.00 | 1.87 | 0.00 | 2.04  | 0.01 | BT014607  | NA                                                                                                         |
| MICRO1222.C2_3168               | 0.68 | 0.01 | 0.65 | 0.02 | 0.63 | 0.01 | 0.53 | 0.01 | 1.57  | 0.01 | 1.30 | 0.10 | 1.39 | 0.11 | 1.24  | 0.20 | AK228556  | Armadillo-like helical [Medicago truncatula]                                                               |
| MICRO1762.C1_234                | 0.21 | 0.01 | 0.41 | 0.01 | 0.18 | 0.07 | 0.64 | 0.07 | 1.61  | 0.01 | 1.78 | 0.23 | 1.17 | 0.11 | 1.27  | 0.01 | AF009261  | NA                                                                                                         |
| LPROH18H_1                      | 0.61 | 0.01 | 0.58 | 0.03 | 0.72 | 0.07 | 0.61 | 0.02 | 1.35  | 0.07 | 1.59 | 0.02 | 1.78 | 0.01 | 1.38  | 0.10 | NA        | NA                                                                                                         |
| BF_LB359XXX_0065e04.13m.scf.51  | 0.74 | 0.22 | 0.64 | 0.11 | 0.81 | 0.24 | 0.49 | 0.06 | 1.75  | 0.02 | 2.13 | 0.01 | 1.68 | 0.02 | 1.17  | 0.50 | NA        | NA                                                                                                         |
| MICRO3024.C5_388                | 0.35 | 0.01 | 0.41 | 0.01 | 0.47 | 0.01 | 0.47 | 0.07 | 1.64  | 0.01 | 1.11 | 0.17 | 1.87 | 0.01 | 1.75  | 0.01 | NA        | hypothetical protein Ch1_018903 [Chrysa salina (epionica cultivar-group)]                                  |
| MICRO1214b.C1_423               | 0.63 | 0.02 | 0.65 | 0.07 | 0.74 | 0.11 | 0.94 | 0.75 | 1.51  | 0.03 | 1.26 | 0.14 | 1.26 | 0.17 | 1.44  | 0.08 | NA        | protein kinase [Malus x domestica]                                                                         |
| MICRO2298.C91_1360              | 0.13 | 0.00 | 0.19 | 0.01 | 0.13 | 0.01 | 0.26 | 0.04 | 3.45  | 0.00 | 2.48 | 0.00 | 2.53 | 0.00 | 2.51  | 0.00 | NA        | NA                                                                                                         |
| MICRO1212.C1_771                | 0.84 | 0.04 | 0.84 | 0.04 | 0.88 | 0.04 | 0.88 | 0.01 | 1.04  | 0.01 | 1.04 | 0.01 | 1.04 | 0.01 | 1.04  | 0.01 | BT013178  | Chloroplast31700 [Chrysa salina (epionica cultivar-group)]                                                 |
| MICRO8460.C2_1243               | 0.53 | 0.00 | 0.67 | 0.03 | 0.74 | 0.07 | 0.81 | 0.58 | 1.10  | 0.48 | 1.25 | 0.14 | 1.37 | 0.03 | 1.82  | 0.01 | AM454905  | carboxyl ester hydrolase / catalytic hydrolase [Arabidopsis thaliana]                                      |
| BF_LB359XXX_0062a12.13m.scf.655 | 0.30 | 0.01 | 0.37 | 0.04 | 0.58 | 0.06 | 0.88 | 0.64 | 3.41  | 0.00 | 1.30 | 0.25 | 2.24 | 0.00 | 1.41  | 0.28 | NA        | NA                                                                                                         |
| MICRO888H.C1_226                | 0.42 | 0.01 | 0.38 | 0.01 | 0.39 | 0.01 | 0.41 | 0.01 | 2.68  | 0.00 | 2.19 | 0.00 | 2.19 | 0.00 | 2.49  | 0.00 | NA        | 1-epigallocatechin [Arabidopsis thaliana]                                                                  |
| BF_LB359XXX_0017c08.13m.scf.223 | 0.42 | 0.01 | 0.59 | 0.12 | 0.39 | 0.05 | 0.77 | 0.41 | 1.85  | 0.01 | 1.74 | 0.06 | 1.78 | 0.04 | 2.00  | 0.03 | NA        | NA                                                                                                         |
| POCBW127V_551                   | 0.68 | 0.08 | 0.82 | 0.17 | 0.83 | 0.17 | 0.81 | 0.17 | 1.13  | 0.33 | 1.38 | 0.03 | 1.06 | 0.52 | 1.54  | 0.04 | NM_005273 | G protein beta 2 subunit [Rattus norvegicus]                                                               |
| MICRO709.C2_869                 | 0.50 | 0.01 | 0.52 | 0.08 | 0.48 | 0.03 | 0.68 | 0.29 | 1.48  | 0.07 | 1.40 | 0.07 | 1.34 | 0.03 | 1.43  | 0.16 | NA        | NA                                                                                                         |
| MICRO1115.C2_1798               | 0.48 | 0.01 | 0.48 | 0.01 | 0.56 | 0.01 | 0.56 | 0.01 | 2.27  | 0.01 | 2.46 | 0.00 | 2.00 | 0.00 | 1.24  | 0.15 | AF482891  | cystathionine gamma-synthase isoform 1 [Solanum tuberosum]                                                 |
| BF_LB359XXX_0057f12.13m.scf.569 | 0.20 | 0.00 | 0.20 | 0.00 | 0.32 | 0.00 | 0.25 | 0.00 | 2.61  | 0.01 | 2.55 | 0.00 | 2.73 | 0.03 | 1.99  | 0.01 | NA        | NA                                                                                                         |
| BF_LB359XXX_0056b06.13m.scf.171 | 0.46 | 0.00 | 0.64 | 0.02 | 0.79 | 0.38 | 0.88 | 0.04 | 1.31  | 0.40 | 1.53 | 0.02 | 2.23 | 0.00 | 2.87  | 0.00 | NA        | NA                                                                                                         |
| MICRO876H.C4_1                  | 0.83 | 0.01 | 0.83 | 0.01 | 0.97 | 0.01 | 0.96 | 0.01 | 1.26  | 0.01 | 1.26 | 0.01 | 1.26 | 0.01 | 1.26  | 0.01 | AF422548  | 17.8 kDa class I heat shock protein (Hsp20.0)                                                              |
| MICRO1017.C2_1119               | 0.72 | 0.04 | 0.78 | 0.14 | 0.90 | 0.45 | 0.81 | 0.29 | 1.13  | 0.43 | 1.10 | 0.48 | 1.12 | 0.45 | 1.49  | 0.08 | BA800042  | ATPK5, phosphoglycolate phosphatase [Arabidopsis thaliana]                                                 |
| MICRO1839H.C1_690               | 0.23 | 0.01 | 0.29 | 0.10 | 0.19 | 0.02 | 0.36 | 0.13 | 6.34  | 0.00 | 3.22 | 0.00 | 3.17 | 0.00 | 1.71  | 0.06 | NA        | NA                                                                                                         |
| MICRO3807.C1_710                | 0.88 | 0.01 | 0.74 | 0.01 | 0.76 | 0.01 | 1.36 | 0.12 | 1.47  | 0.01 | 1.56 | 0.01 | 1.47 | 0.01 | 1.82  | 0.01 | AB192882  | iron chain dehydrogenase [Solanum tuberosum]                                                               |
| MICRO1193b.C1_1438              | 0.39 | 0.01 | 0.51 | 0.02 | 0.48 | 0.01 | 0.69 | 0.08 | 1.19  | 0.16 | 1.36 | 0.08 | 1.45 | 0.02 | 1.12  | 0.46 | NA        | NA                                                                                                         |
| MICRO1212.C1_64                 | 0.84 | 0.01 | 0.44 | 0.02 | 0.48 | 0.01 | 0.58 | 0.05 | 2.20  | 0.00 | 2.16 | 0.00 | 1.79 | 0.01 | 2.12  | 0.01 | AC193778  | NA                                                                                                         |
| MICRO7929.C1_557                | 0.22 | 0.02 | 0.22 | 0.02 | 0.17 | 0.01 | 0.22 | 0.11 | 4.43  | 0.08 | 1.92 | 0.12 | 1.98 | 0.01 | 1.98  | 0.01 | NA        | NA                                                                                                         |
| MICRO867H.C1_1069               | 0.80 | 0.17 | 0.78 | 0.32 | 0.67 | 0.16 | 0.68 | 0.30 | 3.06  | 0.01 | 2.42 | 0.00 | 1.71 | 0.06 | 1.03  | 0.93 | U93444    | inositol monophosphatase 1 (IMPase 1) (IMP 1) (inositol-1-lip-dimorphosphatase 1)                          |
| BF_LB359XXX_0024c11.13m.scf.41  | 0.24 | 0.01 | 0.27 | 0.01 | 0.25 | 0.03 | 0.37 | 0.03 | 2.95  | 0.04 | 2.10 | 0.00 | 2.28 | 0.00 | 2.41  | 0.01 | NA        | NA                                                                                                         |
| MICRO1181.C2_1223               | 0.46 | 0.03 | 0.64 | 0.04 | 0.71 | 0.05 | 0.67 | 0.26 | 1.68  | 0.01 | 1.65 | 0.01 | 1.68 | 0.01 | 1.88  | 0.01 | AM451749  | Chloroplast20100 [Chrysa salina (epionica cultivar-group)]                                                 |
| MICRO1781.C1_1624               | 0.61 | 0.02 | 0.56 | 0.14 | 0.53 | 0.03 | 0.67 | 0.39 | 2.19  | 0.00 | 1.64 | 0.07 | 1.87 | 0.01 | 1.03  | 0.88 | NA        | hydrolase [Arabidopsis thaliana]                                                                           |
| POAC337P_841                    | 0.22 | 0.00 | 0.31 | 0.04 | 0.34 | 0.01 | 0.52 | 0.14 | 1.87  | 0.01 | 1.86 | 0.02 | 2.05 | 0.01 | 1.50  | 0.19 | NA        | NA                                                                                                         |
| BF_LB359XXX_0005b13.13m.scf.378 | 0.12 | 0.00 | 0.14 | 0.00 | 0.16 | 0.01 | 0.16 | 0.01 | 6.86  | 0.00 | 6.80 | 0.00 | 6.80 | 0.00 | 6.80  | 0.00 | AF151395  | NA                                                                                                         |
| MICRO10267.C1_865               | 0.29 | 0.00 | 0.40 | 0.02 | 0.28 | 0.00 | 0.50 | 0.03 | 2.31  | 0.00 | 2.19 | 0.00 | 1.79 | 0.01 | 1.77  | 0.02 | NA        | NA                                                                                                         |
| SDNBDN30H.scf.149               | 0.73 | 0.05 | 0.88 | 0.41 | 0.98 | 0.81 | 0.98 | 0.77 | 1.37  | 0.07 | 1.29 | 0.12 | 1.16 | 0.67 | 1.75  | 0.02 | BT014077  | contains similarity to poly(A)-binding protein II [Arabidopsis thaliana]                                   |
| MICRO1408B.C1_1335              | 0.53 | 0.01 | 0.60 | 0.01 | 0.68 | 0.01 | 0.68 | 0.01 | 1.98  | 0.15 | 1.98 | 0.01 | 1.98 | 0.01 | 1.98  | 0.01 | BT0174807 | NA                                                                                                         |
| MICRO1593b.C1_736               | 0.27 | 0.02 | 0.32 | 0.01 | 0.42 | 0.00 | 0.63 | 0.06 | 2.52  | 0.01 | 3.24 | 0.04 | 3.12 | 0.00 | 3.07  | 0.00 | NA        | unknown protein [Arabidopsis thaliana]                                                                     |
| 089H10AF.scf.557                | 0.40 | 0.01 | 0.51 | 0.08 | 0.55 | 0.08 | 0.73 | 0.37 | 1.22  | 0.31 | 1.39 | 0.33 | 1.41 | 0.09 | 1.23  | 0.62 | NA        | TR-NBS-LRR disease resistance-like protein [Populus balsamifera]                                           |
| MICRO5245.C1_796                | 0.84 | 0.86 | 0.85 | 0.86 | 0.84 | 0.87 | 0.84 | 0.87 | 2.78  | 0.00 | 3.32 |      |      |      |       |      |           |                                                                                                            |

|                                  |      |      |      |      |      |      |      |      |      |      |      |      |       |      |        |          |           |
|----------------------------------|------|------|------|------|------|------|------|------|------|------|------|------|-------|------|--------|----------|-----------|
| BF_LBCH0000_00180505_TSM_SCF_217 | 0.32 | 0.01 | 0.30 | 0.05 | 0.24 | 0.02 | 0.57 | 0.24 | 0.37 | 0.00 | 2.72 | 0.02 | 2.82  | 0.00 | 2.01   | 0.02     | NA        |
| MICRO_12590.C3_1123              | 0.46 | 0.00 | 0.55 | 0.02 | 0.66 | 0.04 | 0.38 | 0.00 | 1.78 | 0.01 | 2.25 | 0.00 | 2.46  | 0.00 | 1.88   | 0.01     | AM424577  |
| MICRO_12603.C2_209               | 0.37 | 0.01 | 0.36 | 0.01 | 0.43 | 0.00 | 1.77 | 0.24 | 1.06 | 0.70 | 1.23 | 0.22 | 1.38  | 0.02 | 3.35   | 0.00     | AD49492   |
| MICRO_2286.C4_872                | 0.28 | 0.08 | 0.21 | 0.00 | 0.16 | 0.00 | 0.34 | 0.01 | 2.43 | 0.01 | 2.08 | 0.00 | 1.99  | 0.00 | 1.37   | 0.01     | NA        |
| MICRO_12403.C2_373               | 0.17 | 0.00 | 0.29 | 0.00 | 0.36 | 0.06 | 0.34 | 0.01 | 4.10 | 0.00 | 5.20 | 0.00 | 4.06  | 0.04 | 4.79   | 0.01     | AJ217853  |
| MICRO_12727.C1_371               | 0.86 | 0.21 | 0.61 | 0.03 | 0.77 | 0.01 | 0.77 | 0.01 | 1.53 | 0.03 | 1.77 | 0.01 | 1.77  | 0.01 | 1.77   | 0.01     | AT101311  |
| BF_LBCH0000_001007_TSM_SCF_368   | 0.21 | 0.02 | 0.33 | 0.00 | 0.29 | 0.00 | 0.38 | 0.01 | 2.55 | 0.01 | 3.32 | 0.01 | 2.89  | 0.00 | 2.01   | 0.01     | NA        |
| MICRO_1137.C1_1015               | 0.84 | 0.68 | 0.73 | 0.50 | 0.79 | 0.71 | 0.63 | 0.25 | 1.59 | 0.06 | 1.96 | 0.28 | 1.67  | 0.10 | 1.56   | 0.23     | NA        |
| BF_mvfxxxx_00090103_03m_scf_520  | 0.32 | 0.01 | 0.66 | 0.12 | 0.54 | 0.03 | 0.44 | 0.03 | 1.85 | 0.03 | 2.18 | 0.03 | 1.78  | 0.15 | 1.71   | 0.00     | AY167828  |
| BF_mvfxxxx_005105_03m_scf_42     | 0.58 | 0.00 | 0.43 | 0.01 | 0.78 | 0.08 | 0.98 | 0.85 | 1.44 | 0.08 | 0.92 | 0.56 | 1.75  | 0.01 | 2.40   | 0.00     | NA        |
| BF_TUBSXXXX_0022712_TSM_SCF_338  | 0.13 | 0.01 | 0.16 | 0.03 | 0.14 | 0.02 | 0.43 | 0.03 | 0.65 | 0.00 | 2.20 | 0.02 | 3.46  | 0.00 | 3.12   | 0.01     | NA        |
| EST1_TK147H_763                  | 0.82 | 0.16 | 0.45 | 0.01 | 0.48 | 0.12 | 0.45 | 0.01 | 0.94 | 0.01 | 1.79 | 0.01 | 1.78  | 0.01 | 1.83   | 0.01     | NA        |
| MICRO_3554.C1_1072               | 0.62 | 0.01 | 0.42 | 0.00 | 0.56 | 0.00 | 0.35 | 0.00 | 2.20 | 0.00 | 1.77 | 0.01 | 1.88  | 0.00 | 1.93   | 0.00     | BT013178  |
| 09H08AF_sml_634                  | 0.58 | 0.00 | 0.58 | 0.01 | 0.52 | 0.00 | 1.09 | 0.51 | 1.03 | 0.82 | 1.39 | 0.28 | 1.61  | 0.01 | 6.18   | 0.00     | DC200394  |
| BF_mvfxxxx_001560103m_scf_141    | 0.15 | 0.00 | 0.24 | 0.00 | 0.18 | 0.00 | 0.28 | 0.01 | 1.79 | 0.01 | 1.78 | 0.01 | 1.83  | 0.01 | 2.15   | 0.00     | NA        |
| MICRO_10185.C1_1113              | 0.13 | 0.00 | 0.27 | 0.08 | 0.09 | 0.02 | 0.28 | 0.11 | 2.85 | 0.07 | 2.49 | 0.07 | 3.38  | 0.05 | 2.40   | 0.01     | U71107    |
| MICRO_2286.C24_896               | 0.26 | 0.00 | 0.42 | 0.02 | 0.34 | 0.01 | 0.29 | 0.05 | 8.52 | 0.00 | 4.08 | 0.00 | 4.42  | 0.00 | 2.11   | 0.02     | NA        |
| 19E11AF_sml_692                  | 0.21 | 0.07 | 0.20 | 0.16 | 0.20 | 0.02 | 0.42 | 0.11 | 2.49 | 0.01 | 2.51 | 0.00 | 2.17  | 0.00 | 1.81   | 0.04     | BT013258  |
| BF_mvfxxxx_00090103_03m_scf_76   | 0.21 | 0.00 | 0.29 | 0.00 | 0.46 | 0.05 | 0.53 | 0.16 | 1.56 | 0.02 | 1.74 | 0.13 | 2.31  | 0.01 | 3.37   | 0.00     | NA        |
| MICRO_6888.C1_1002               | 0.35 | 0.01 | 0.63 | 0.01 | 0.31 | 0.02 | 0.49 | 0.11 | 1.48 | 0.11 | 2.25 | 0.11 | 1.96  | 0.03 | 1.80   | 0.02     | NA        |
| MICRO_12584.C1_397               | 0.50 | 0.04 | 0.52 | 0.01 | 0.47 | 0.01 | 0.13 | 0.00 | 4.00 | 0.00 | 2.57 | 0.02 | 3.39  | 0.00 | 1.87   | 0.08     | AJ133601  |
| BF_mvfxxxx_00090103_03m_scf_409  | 0.53 | 0.07 | 0.49 | 0.00 | 0.59 | 0.08 | 0.37 | 0.02 | 5.15 | 0.00 | 4.60 | 0.01 | 1.39  | 0.47 | 2.17   | 0.09     | NA        |
| MICRO_10720.C2_586               | 0.80 | 0.09 | 0.52 | 0.01 | 0.52 | 0.01 | 0.57 | 0.04 | 3.15 | 0.01 | 1.84 | 0.04 | 1.68  | 0.07 | 1.50   | 0.04     | NA        |
| MICRO_12079.C1_950               | 0.57 | 0.01 | 0.80 | 0.29 | 0.73 | 0.10 | 0.96 | 0.80 | 0.97 | 0.86 | 2.02 | 0.04 | 1.45  | 0.07 | 1.86   | 0.01     | NA        |
| MICRO_2286.C78_1794              | 0.16 | 0.01 | 0.16 | 0.04 | 0.05 | 0.03 | 0.18 | 0.14 | 3.89 | 0.00 | 2.95 | 0.05 | 3.14  | 0.01 | 2.30   | 0.01     | NA        |
| MICRO_6877.C3_114                | 0.35 | 0.00 | 0.42 | 0.00 | 0.54 | 0.00 | 0.75 | 0.09 | 1.55 | 0.03 | 1.86 | 0.05 | 2.41  | 0.03 | 4.04   | 0.00     | MC4399    |
| BF_TUBSXXXX_00060505_TSM_SCF_316 | 0.18 | 0.00 | 0.34 | 0.01 | 0.38 | 0.01 | 0.42 | 0.05 | 1.68 | 0.02 | 1.72 | 0.01 | 1.69  | 0.03 | 2.40   | 0.00     | NA        |
| BF_mvfxxxx_00090103_03m_scf_190  | 0.39 | 0.01 | 0.50 | 0.08 | 0.51 | 0.07 | 0.74 | 0.44 | 2.18 | 0.01 | 2.02 | 0.01 | 1.28  | 0.23 | 2.01   | 0.02     | CU120847  |
| MICRO_1508.C1_581                | 0.39 | 0.01 | 0.42 | 0.08 | 0.35 | 0.04 | 0.70 | 0.27 | 2.40 | 0.05 | 3.45 | 0.00 | 2.58  | 0.00 | 5.66   | 0.00     | NA        |
| STM087V_638                      | 0.84 | 0.37 | 0.56 | 0.03 | 0.56 | 0.05 | 0.50 | 0.05 | 1.91 | 0.02 | 1.36 | 0.11 | 1.60  | 0.02 | 1.19   | 0.44     | NA        |
| STM087V_373                      | 0.29 | 0.03 | 0.26 | 0.31 | 0.23 | 0.05 | 0.33 | 0.05 | 3.33 | 0.05 | 3.27 | 0.06 | 16.34 | 0.20 | 12.92  | 0.20     | L22922    |
| MICRO_250.C1_1275                | 0.69 | 0.05 | 0.48 | 0.08 | 0.68 | 0.28 | 0.71 | 0.05 | 1.65 | 0.01 | 3.31 | 0.21 | 1.38  | 0.03 | 1.76   | 0.02     | BT013388  |
| MICRO_12760.C1_657               | 0.35 | 0.02 | 0.55 | 0.13 | 0.42 | 0.04 | 0.73 | 0.37 | 1.79 | 0.02 | 1.63 | 0.03 | 1.84  | 0.02 | 1.62   | 0.16     | AM438262  |
| MICRO_2286.C83_837               | 0.16 | 0.00 | 0.22 | 0.07 | 0.14 | 0.02 | 0.14 | 0.02 | 3.58 | 0.02 | 3.01 | 0.02 | 3.81  | 0.00 | 2.03   | 0.00     | NA        |
| ESTAS15TH_219                    | 0.07 | 0.00 | 0.09 | 0.00 | 0.05 | 0.00 | 0.09 | 0.01 | 2.57 | 0.00 | 2.46 | 0.00 | 2.46  | 0.00 | 2.53   | 0.00     | DC027848  |
| MICRO_13698.C4_392               | 0.29 | 0.04 | 0.36 | 0.05 | 0.29 | 0.04 | 0.88 | 0.79 | 1.67 | 0.10 | 1.74 | 0.02 | 2.10  | 0.05 | 2.64   | 0.00     | NA        |
| MICRO_13698.C1_1885              | 0.81 | 0.81 | 0.78 | 0.81 | 0.81 | 0.81 | 0.81 | 0.81 | 0.81 | 0.81 | 0.81 | 0.81 | 0.81  | 0.81 | 0.81   | 0.81     | AP0909271 |
| MICRO_432.C7_872                 | 0.93 | 0.89 | 0.65 | 0.06 | 0.53 | 0.13 | 0.43 | 0.08 | 6.96 | 0.00 | 3.47 | 0.00 | 2.58  | 0.00 | 1.17   | 0.35     | NA        |
| PPCC527H_663                     | 0.56 | 0.03 | 0.81 | 0.39 | 0.71 | 0.20 | 0.46 | 0.01 | 2.38 | 0.04 | 2.43 | 0.08 | 1.84  | 0.17 | 2.79   | 0.01     | NA        |
| MICRO_286.C1_1472                | 0.17 | 0.01 | 0.21 | 0.02 | 0.19 | 0.02 | 0.43 | 0.02 | 0.63 | 0.00 | 2.78 | 0.00 | 2.78  | 0.00 | 2.84   | 0.00     | NA        |
| ESTE1F10H_837                    | 0.63 | 0.04 | 0.63 | 0.15 | 0.53 | 0.35 | 0.48 | 0.10 | 2.45 | 0.04 | 2.37 | 0.07 | 3.08  | 0.01 | 1.00   | 0.99     | NA        |
| 06F02AF_sml_475                  | 0.80 | 0.14 | 0.87 | 0.50 | 0.70 | 0.08 | 0.80 | 0.42 | 1.16 | 0.32 | 1.26 | 0.18 | 1.21  | 0.28 | 1.18   | 0.47     | NM_120741 |
| ACDAB03V70m_sml_21               | 0.57 | 0.01 | 0.71 | 0.10 | 0.67 | 0.02 | 0.83 | 0.29 | 1.07 | 0.80 | 1.51 | 0.04 | 1.85  | 0.04 | 2.81   | 0.00     | NA        |
| MICRO_19425.C2_1257              | 0.13 | 0.01 | 0.32 | 0.08 | 0.06 | 0.00 | 0.11 | 0.28 | 0.01 | 0.29 | 0.01 | 0.29 | 0.01  | 2.06 | 0.00   | AY242031 |           |
| MICRO_8889.C1_823                | 0.64 | 0.19 | 0.54 | 0.05 | 0.51 | 0.00 | 0.64 | 0.07 | 1.66 | 0.01 | 2.55 | 0.00 | 1.51  | 0.01 | 0.84   | 0.47     | NA        |
| MICRO_12343.C1_703               | 0.44 | 0.00 | 0.07 | 0.00 | 0.13 | 0.01 | 0.08 | 0.02 | 6.62 | 0.00 | 3.78 | 0.03 | 6.64  | 0.01 | 132386 | NA       |           |
| POCAY84TP_462                    | 0.28 | 0.01 | 0.28 | 0.01 | 0.28 | 0.01 | 0.28 | 0.01 | 0.28 | 0.01 | 0.28 | 0.01 | 0.28  | 0.01 | 0.28   | 0.01     | NA        |
| MICRO_6410.C1_710                | 0.37 | 0.00 | 0.47 | 0.04 | 0.42 | 0.01 | 0.61 | 0.11 | 1.29 | 0.13 | 1.35 | 0.13 | 1.54  | 0.04 | 1.92   | 0.01     | AP0909256 |
| MICRO_12343.C1_703               | 0.55 | 0.10 | 0.63 | 0.04 | 0.64 | 0.03 | 0.48 | 0.02 | 2.54 | 0.00 | 2.74 | 0.01 | 2.68  | 0.01 | 1.48   | 0.12     | NA        |
| MICRO_12501.C1_698               | 0.28 | 0.01 | 0.38 | 0.04 | 0.38 | 0.03 | 0.38 | 0.03 | 2.06 | 0.04 | 2.45 | 0.01 | 2.45  | 0.01 | 2.45   | 0.01     | NA        |
| ESTP0327H_784                    | 0.52 | 0.00 | 0.77 | 0.16 | 0.82 | 0.11 | 0.62 | 0.05 | 1.98 | 0.00 | 1.84 | 0.06 | 1.83  | 0.01 | 2.10   | 0.00     | AP0909271 |
| MICRO_12694.C2_253               | 0.74 | 0.16 | 0.80 | 0.20 | 0.65 | 0.04 | 0.90 | 0.81 | 1.20 | 0.27 | 1.54 | 0.02 | 1.06  | 0.64 | 2.57   | 0.00     | AY137315  |
| MICRO_8693.C2_1677               | 0.05 | 0.00 | 0.16 | 0.01 | 0.17 | 0.01 | 0.17 | 0.01 | 2.49 | 0.03 | 2.85 | 0.03 | 2.85  | 0.03 | 2.85   | 0.03     | BT014206  |
| ESTB411TH_300                    | 0.30 | 0.00 | 0.32 | 0.02 | 0.32 | 0.01 | 0.65 | 0.14 | 0.33 | 0.14 | 0.40 | 0.17 | 0.28  | 0.89 | 0.13   | NA       |           |
| SDNR01L05u_sml_399               | 0.22 | 0.01 | 0.21 | 0.03 | 0.24 | 0.01 | 0.48 | 0.05 | 1.84 | 0.01 | 2.20 | 0.00 | 2.22  | 0.01 | 2.58   | 0.00     | NA        |
| BF_mvfxxxx_00090103_03m_scf_159  | 0.65 | 0.08 | 0.65 | 0.08 | 0.65 | 0.08 | 0.65 | 0.08 | 0.65 | 0.08 | 0.65 | 0.08 | 0.65  | 0.08 | 0.65   | 0.08     | NA        |
| STB0602G13u_sml_383              | 0.44 | 0.01 | 0.38 | 0.13 | 0.38 | 0.16 | 0.72 | 0.18 | 1.69 | 0.02 | 1.62 | 0.05 | 1.38  | 0.07 | 1.96   | 0.01     | AC149290  |
| MICRO_12265.C1_556               | 0.27 | 0.00 | 0.56 | 0.07 | 0.44 | 0.01 | 1.00 | 0.99 | 1.84 | 0.21 | 3.35 | 0.08 | 2.82  | 0.11 | 4.63   | 0.01     | NA        |
| BF_TUBSXXXX_000309_TSM_SCF_247   | 0.10 | 0.01 | 0.21 | 0.01 | 0.08 | 0.02 | 0.08 | 0.02 | 3.04 | 0.01 | 3.04 | 0.01 | 3.16  | 0.00 | 1.98   | 0.00     | NA        |
| MICRO_10277.C1_412               | 0.72 | 0.06 | 0.62 | 0.03 | 0.78 | 0.07 | 0.67 | 0.04 | 1.29 | 0.19 | 1.37 | 0.07 | 1.56  | 0.01 | 1.50   | 0.04     | NA        |
| MICRO_2347.C2_894                | 0.74 | 0.08 | 0.73 | 0.07 | 0.75 | 0.06 | 0.87 | 0.27 | 1.18 | 0.27 | 1.59 | 0.01 | 1.84  | 0.00 | 1.85   | 0.01     | AM446868  |
| MICRO_2286.C107_376              | 0.48 | 0.01 | 0.54 | 0.08 | 0.68 | 0.08 | 0.68 | 0.08 | 0.34 | 0.32 | 0.81 | 0.01 | 0.81  | 0.01 | 0.81   | 0.01     | NA        |
| BF_mvfxxxx_004502_03m_scf_391    | 0.57 | 0.03 | 0.79 | 0.42 | 0.69 | 0.07 | 1.08 | 0.79 | 1.34 | 0.14 | 1.88 |      |       |      |        |          |           |

|                               |      |      |      |      |      |      |      |      |      |      |      |      |      |      |      |      |          |                                                                        |
|-------------------------------|------|------|------|------|------|------|------|------|------|------|------|------|------|------|------|------|----------|------------------------------------------------------------------------|
| POCCR37P_862                  | 0.08 | 0.00 | 0.19 | 0.02 | 0.06 | 0.01 | 0.20 | 0.02 | 2.77 | 0.08 | 2.99 | 0.01 | 2.11 | 0.14 | 1.80 | 0.02 | NA       | NA                                                                     |
| MICRO1081_C29_887             | 0.49 | 0.08 | 0.74 | 0.31 | 0.41 | 0.01 | 0.35 | 0.01 | 1.81 | 0.06 | 2.15 | 0.02 | 1.24 | 0.11 | 1.28 | 0.05 | AP009271 | NA                                                                     |
| MICRO895.C1_752               | 0.55 | 0.07 | 0.95 | 0.18 | 0.65 | 0.48 | 0.62 | 0.41 | 2.93 | 0.01 | 1.65 | 0.18 | 2.77 | 0.04 | 2.77 | 0.02 | NA       | Heat shock protein DnaJ [Medicago truncatula]                          |
| MICRO1623.C1_21               | 0.37 | 0.04 | 0.59 | 0.24 | 0.46 | 0.28 | 1.04 | 0.89 | 1.63 | 0.18 | 2.77 | 0.07 | 2.52 | 0.00 | 3.08 | 0.00 | AN430462 | nucleic acid binding [Arabidopsis thaliana]                            |
| lf_mfxxxx_000305.03m.scd_342  | 0.62 | 0.02 | 0.74 | 0.11 | 0.74 | 0.07 | 0.74 | 0.10 | 2.06 | 0.01 | 1.41 | 0.08 | 1.85 | 0.01 | 1.26 | 0.01 | AY428286 | slight resistance protein T18 [Solanum torajense]                      |
| MICRO1593.C1_521              | 0.01 | 0.01 | 0.08 | 0.01 | 0.01 | 0.01 | 0.05 | 0.01 | 2.49 | 0.01 | 0.01 | 0.28 | 0.01 | 0.01 | 0.01 | 0.01 | NA       | NA                                                                     |
| MICRO432_C6_789               | 0.68 | 0.03 | 0.55 | 0.02 | 0.54 | 0.13 | 0.43 | 0.05 | 5.17 | 0.00 | 3.07 | 0.00 | 2.18 | 0.01 | 1.10 | 0.47 | NA       | RD22-like protein [Vitis vinifera]                                     |
| TBSK018FD04.03m.scd_150       | 0.47 | 0.00 | 0.60 | 0.02 | 0.60 | 0.01 | 1.47 | 0.03 | 1.04 | 0.84 | 1.37 | 0.42 | 1.92 | 0.00 | 7.48 | 0.00 | DC020394 | NA                                                                     |
| MICRO2335.C1_690              | 0.47 | 0.02 | 0.72 | 0.02 | 0.68 | 0.01 | 0.68 | 0.10 | 1.43 | 0.09 | 1.55 | 0.06 | 1.77 | 0.01 | 1.45 | 0.06 | CG372924 | unknown protein product [Arabidopsis thaliana]                         |
| MICRO12017.C1_741             | 0.35 | 0.03 | 0.43 | 0.04 | 0.22 | 0.00 | 0.50 | 0.03 | 1.58 | 0.02 | 1.43 | 0.06 | 1.18 | 0.01 | 1.62 | 0.04 | AK224807 | NA                                                                     |
| STMCH07V_168                  | 0.57 | 0.06 | 0.64 | 0.06 | 0.41 | 0.01 | 0.55 | 0.03 | 2.27 | 0.01 | 1.92 | 0.01 | 1.20 | 0.18 | 1.79 | 0.01 | NA       | NA                                                                     |
| POCR307V_419                  | 0.68 | 0.05 | 0.78 | 0.05 | 0.68 | 0.04 | 0.60 | 0.05 | 3.98 | 0.00 | 2.54 | 0.00 | 2.72 | 0.01 | 1.45 | 0.08 | NA       | NA                                                                     |
| lPROIE147H_203                | 0.49 | 0.00 | 0.63 | 0.04 | 0.64 | 0.02 | 0.44 | 0.01 | 2.87 | 0.00 | 2.86 | 0.00 | 1.75 | 0.05 | 3.49 | 0.04 | AP009271 | NA                                                                     |
| MICRO11861.C1_1015            | 0.10 | 0.01 | 0.18 | 0.04 | 0.15 | 0.01 | 0.36 | 0.10 | 3.07 | 0.00 | 2.62 | 0.03 | 3.40 | 0.00 | 2.46 | 0.01 | NA       | NA                                                                     |
| STMJ07V_219                   | 0.29 | 0.00 | 0.35 | 0.04 | 0.40 | 0.03 | 0.98 | 0.93 | 1.99 | 0.15 | 1.20 | 0.47 | 1.81 | 0.01 | 3.10 | 0.00 | AN488786 | Chp70691200 [Oryza sativa (japonica cultivar-group)]                   |
| MICRO847.C1_241               | 0.49 | 0.08 | 0.70 | 0.17 | 0.58 | 0.04 | 0.76 | 0.22 | 1.77 | 0.02 | 1.85 | 0.01 | 1.55 | 0.17 | 2.83 | 0.00 | AC149395 | NA                                                                     |
| MICRO10360.C2_733             | 0.39 | 0.12 | 0.41 | 0.11 | 0.25 | 0.00 | 0.39 | 0.00 | 1.59 | 0.18 | 1.83 | 0.12 | 1.73 | 0.01 | 2.38 | 0.00 | CG329701 | CTV22 [Panicum tritiforme]                                             |
| lf_sapxxxx_000909.03m.scd_630 | 0.91 | 0.80 | 0.94 | 0.98 | 0.89 | 0.80 | 0.31 | 0.00 | 1.63 | 0.24 | 1.81 | 0.05 | 1.95 | 0.25 | 1.34 | 0.07 | NA       | hypothetical protein MHR4FT_AC107263b2 [Medicago truncatula]           |
| MICRO12460.C2_1173            | 0.76 | 0.30 | 0.71 | 0.25 | 0.54 | 0.01 | 0.88 | 0.05 | 1.99 | 0.89 | 1.68 | 0.03 | 1.16 | 0.26 | 1.94 | 0.00 | NA       | UDP-N-acetylglucosamine-2-glucamate lyase [Physocarpus opulifolius]    |
| STMH91TV_533                  | 0.76 | 0.10 | 0.64 | 0.04 | 0.74 | 0.07 | 0.79 | 0.13 | 1.22 | 0.22 | 1.26 | 0.16 | 1.35 | 0.05 | 1.27 | 0.12 | ZS4527   | Signal recognition particle 54 kDa protein 2 (SRP54)                   |
| MICRO8902.C1_429              | 1.07 | 0.71 | 1.00 | 0.84 | 0.91 | 0.01 | 0.35 | 0.02 | 1.91 | 0.01 | 1.46 | 0.15 | 1.53 | 0.05 | 1.24 | 0.22 | AB032038 | chromomethylase-like protein [Nicotiana glauca]                        |
| MICRO36.C2_147                | 0.86 | 0.21 | 0.78 | 0.28 | 0.62 | 0.02 | 0.64 | 0.02 | 2.22 | 0.00 | 3.17 | 0.00 | 1.36 | 0.02 | 1.92 | 0.88 | DC028446 | unknown [Solanum tuberosum]                                            |
| lSTB13AH7H_425                | 0.43 | 0.00 | 0.50 | 0.08 | 0.45 | 0.02 | 0.75 | 0.24 | 1.45 | 0.06 | 1.66 | 0.04 | 1.56 | 0.03 | 1.43 | 0.12 | NA       | NA                                                                     |
| MICRO1206C_C4_1279            | 0.16 | 0.01 | 0.23 | 0.08 | 0.12 | 0.02 | 0.41 | 0.13 | 3.53 | 0.00 | 2.05 | 0.01 | 2.37 | 0.00 | 1.62 | 0.04 | AY940339 | calcium-dependent protein kinase 4 [Capsicum annuum]                   |
| lf_LBCH00X_000306.TM.SCF_241  | 0.25 | 0.02 | 0.47 | 0.18 | 0.31 | 0.06 | 1.01 | 0.97 | 1.45 | 0.14 | 1.54 | 0.10 | 1.51 | 0.15 | 1.95 | 0.07 | NA       | NA                                                                     |
| MICRO6656.C2_1014             | 0.25 | 0.00 | 0.29 | 0.05 | 0.39 | 0.08 | 0.76 | 0.68 | 1.13 | 0.36 | 1.28 | 0.25 | 1.58 | 0.01 | 3.71 | 0.00 | AK224646 | NA                                                                     |
| MICRO8726.C1_403              | 1.17 | 0.18 | 0.82 | 0.33 | 0.67 | 0.02 | 0.17 | 0.00 | 4.17 | 0.03 | 5.01 | 0.00 | 1.42 | 0.35 | 0.42 | 0.00 | AK224774 | BT2D-like protein [Beta vulgaris]                                      |
| MICRO3745.C1_1872             | 0.65 | 0.01 | 0.87 | 0.34 | 0.95 | 0.72 | 0.61 | 0.03 | 1.72 | 0.01 | 1.46 | 0.04 | 1.28 | 0.21 | 1.04 | 0.63 | NA       | NA                                                                     |
| MICRO14770.C1_919             | 0.30 | 0.02 | 0.29 | 0.02 | 0.32 | 0.02 | 0.79 | 0.15 | 0.61 | 0.04 | 2.73 | 0.06 | 3.22 | 0.07 | 5.83 | 0.01 | NA       | unknown protein [Arabidopsis thaliana]                                 |
| MICRO7411_C2_680              | 0.13 | 0.00 | 0.26 | 0.02 | 0.16 | 0.01 | 0.34 | 0.04 | 1.55 | 0.02 | 1.60 | 0.03 | 1.63 | 0.01 | 1.27 | 0.19 | CG191837 | NA                                                                     |
| MICRO56.C2_721                | 0.30 | 0.01 | 0.27 | 0.01 | 0.27 | 0.01 | 0.24 | 0.03 | 1.93 | 0.01 | 1.07 | 0.01 | 1.87 | 0.01 | 2.00 | 0.01 | NA       | Plant cell wall protein [Medicago truncatula]                          |
| lSTA3611H_271                 | 0.65 | 0.04 | 0.86 | 0.58 | 0.69 | 0.08 | 0.68 | 0.52 | 2.01 | 0.00 | 1.75 | 0.05 | 1.67 | 0.02 | 1.09 | 0.76 | NA       | NA                                                                     |
| MICRO11789.C1_360             | 0.51 | 0.00 | 0.75 | 0.07 | 0.69 | 0.03 | 0.73 | 0.14 | 1.54 | 0.02 | 1.79 | 0.01 | 1.34 | 0.08 | 1.61 | 0.17 | AC149291 | NA                                                                     |
| MICRO3259.C1_841              | 0.34 | 0.04 | 0.34 | 0.04 | 0.44 | 0.08 | 0.44 | 0.05 | 2.63 | 0.02 | 2.63 | 0.02 | 6.34 | 0.01 | 2.35 | 0.00 | AN475461 | AT3G09K9 [Arabidopsis thaliana]                                        |
| STMDF68TV_656                 | 0.15 | 0.01 | 0.18 | 0.02 | 0.15 | 0.01 | 0.47 | 0.08 | 1.29 | 0.17 | 2.06 | 0.00 | 1.78 | 0.05 | 3.49 | 0.00 | NA       | NA                                                                     |
| lSTA2624TH_283                | 0.34 | 0.01 | 0.44 | 0.05 | 0.19 | 0.02 | 0.60 | 0.24 | 1.36 | 0.23 | 1.89 | 0.02 | 2.09 | 0.01 | 3.18 | 0.00 | AM431899 | unnamed protein product [Arabidopsis thaliana]                         |
| STRB0265a.scd_686             | 0.38 | 0.00 | 0.59 | 0.01 | 0.59 | 0.01 | 1.05 | 0.01 | 1.62 | 0.01 | 1.62 | 0.01 | 1.62 | 0.01 | 1.62 | 0.01 | NA       | hypothetical protein [Arabidopsis thaliana]                            |
| MICRO2013.C7_858              | 0.50 | 0.07 | 0.85 | 0.73 | 0.48 | 0.00 | 0.58 | 0.05 | 1.25 | 0.19 | 1.44 | 0.25 | 1.41 | 0.03 | 1.85 | 0.01 | AC151801 | Plum tree disease resistance protein DCS-1 [Solanum demissum]          |
| lf_LBCH00X_000704.TM.SCF_418  | 0.50 | 0.00 | 0.36 | 0.00 | 0.50 | 0.00 | 0.27 | 0.00 | 1.78 | 0.00 | 1.74 | 0.01 | 1.83 | 0.00 | 1.78 | 0.00 | NA       | NA                                                                     |
| MICRO15819.C1_628             | 0.62 | 0.08 | 0.62 | 0.08 | 0.62 | 0.08 | 0.62 | 0.08 | 1.24 | 0.07 | 1.24 | 0.07 | 1.24 | 0.07 | 1.24 | 0.07 | NA       | hypothetical protein Chl_003594 [Oryza sativa (indica cultivar-group)] |
| lf_mfxxxx_001363.03m.scd_24   | 0.21 | 0.00 | 0.28 | 0.02 | 0.22 | 0.02 | 0.54 | 0.05 | 1.20 | 0.26 | 2.65 | 0.00 | 1.48 | 0.03 | 3.83 | 0.00 | BT012751 | NA                                                                     |
| lf_LBCH00X_000508.TM.SCF_601  | 0.65 | 0.01 | 0.71 | 0.08 | 0.73 | 0.09 | 0.57 | 0.06 | 1.71 | 0.01 | 1.89 | 0.03 | 1.02 | 0.92 | 2.11 | 0.01 | NA       | NA                                                                     |
| MICRO4534.C1_986              | 0.26 | 0.01 | 0.31 | 0.03 | 0.23 | 0.03 | 0.49 | 0.16 | 1.74 | 0.02 | 2.43 | 0.00 | 2.09 | 0.01 | 1.80 | 0.00 | NA       | NA                                                                     |
| MICRO11734.C1_950             | 0.71 | 0.16 | 0.71 | 0.16 | 0.89 | 0.29 | 0.39 | 0.24 | 1.99 | 0.24 | 1.99 | 0.24 | 1.99 | 0.24 | 1.99 | 0.01 | BT013369 | putative protein [Arabidopsis thaliana]                                |
| MICRO2545.C2_699              | 0.44 | 0.01 | 0.59 | 0.07 | 0.52 | 0.00 | 0.51 | 0.04 | 1.85 | 0.09 | 2.42 | 0.02 | 1.73 | 0.15 | 2.43 | 0.05 | AF411807 | transcription factor [Arabidopsis thaliana]                            |
| MICRO1622.C1_397              | 0.48 | 0.02 | 0.52 | 0.01 | 0.66 | 0.04 | 0.75 | 0.14 | 1.11 | 0.47 | 1.20 | 0.18 | 1.37 | 0.05 | 1.50 | 0.03 | NA       | NA                                                                     |
| MICRO13862.C1_591             | 0.74 | 0.02 | 0.74 | 0.02 | 0.61 | 0.08 | 0.74 | 0.02 | 1.29 | 0.27 | 1.29 | 0.27 | 1.29 | 0.27 | 1.29 | 0.01 | AP009283 | RNA binding / transcription factor [Arabidopsis thaliana]              |
| MICRO17986.C1_306             | 0.51 | 0.00 | 0.93 | 0.66 | 0.75 | 0.07 | 0.73 | 0.06 | 1.63 | 0.01 | 1.94 | 0.01 | 1.10 | 0.48 | 2.24 | 0.00 | CG120847 | NA                                                                     |
| MICRO3156.C1_1188             | 0.77 | 0.18 | 0.74 | 0.09 | 0.91 | 0.37 | 0.66 | 0.03 | 1.59 | 0.01 | 1.19 | 0.26 | 1.35 | 0.04 | 1.29 | 0.00 | NA       | putative DNA binding protein-like [Solanum tuberosum]                  |
| MICRO1663.C5_221              | 0.38 | 0.01 | 0.38 | 0.01 | 0.38 | 0.01 | 0.38 | 0.01 | 2.31 | 0.00 | 2.31 | 0.00 | 2.31 | 0.00 | 2.31 | 0.00 | NA       | hypothetical protein [Arabidopsis thaliana]                            |
| lf_aryxxxx_004609.07m.scd_611 | 0.43 | 0.11 | 0.38 | 0.05 | 0.28 | 0.01 | 0.54 | 0.10 | 2.54 | 0.07 | 2.68 | 0.02 | 1.22 | 0.23 | 3.98 | 0.00 | BT013402 | unknown protein [Arabidopsis thaliana]                                 |
| MICRO1189.C6_894              | 0.38 | 0.00 | 0.14 | 0.01 | 0.39 | 0.01 | 0.18 | 0.02 | 2.77 | 0.00 | 3.49 | 0.00 | 3.18 | 0.00 | 8.26 | 0.00 | DC035080 | CYP72A56 [Nicotiana glauca]                                            |
| lSTR219TH_66                  | 0.88 | 0.01 | 0.88 | 0.01 | 0.88 | 0.01 | 0.88 | 0.01 | 4.02 | 0.13 | 4.02 | 0.13 | 4.02 | 0.13 | 4.02 | 0.13 | NA       | NA                                                                     |
| MICRO6029.C4_568              | 0.75 | 0.09 | 0.71 | 0.08 | 0.75 | 0.10 | 0.48 | 0.01 | 1.95 | 0.00 | 1.51 | 0.03 | 1.82 | 0.01 | 1.16 | 0.04 | NA       | NA                                                                     |
| MICRO2525.C1_381              | 0.33 | 0.02 | 0.23 | 0.04 | 0.12 | 0.03 | 0.19 | 0.16 | 3.21 | 0.00 | 3.27 | 0.04 | 3.38 | 0.01 | 4.90 | 0.01 | NA       | NA                                                                     |
| MICRO9027.C1_728              | 0.68 | 0.01 | 0.68 | 0.01 | 0.68 | 0.01 | 0.68 | 0.01 | 1.54 | 0.03 | 1.54 | 0.03 | 1.54 | 0.03 | 1.54 | 0.03 | AK224798 | Taf5 [Nicotiana tomentosifolia]                                        |
| lf_aryxxxx_004905.07m.scd_659 | 0.70 | 0.03 | 0.72 | 0.07 | 0.66 | 0.03 | 0.93 | 0.58 | 1.01 | 0.98 | 1.62 | 0.02 | 1.38 | 0.04 | 3.14 | 0.00 | BT013317 | NA                                                                     |
| MICRO8033.C1_707              | 0.30 | 0.00 | 0.50 | 0.01 | 0.46 | 0.01 | 0.41 | 0.01 | 3.15 | 0.01 | 4.11 | 0.00 | 2.93 | 0.07 | 4.09 | 0.01 | NA       | NA                                                                     |
| lf_mfxxxx_002211.03m.scd_159  | 0.25 | 0.01 | 0.25 | 0.01 | 0.25 | 0.01 | 0.25 | 0.01 | 0.68 | 0.02 | 0.74 | 0.02 | 0.74 | 0.02 | 0.74 | 0.02 | NA       | NA                                                                     |
| POCD425TV_238                 | 0.43 | 0.00 | 0.71 | 0.08 | 0.64 | 0.02 | 1.15 | 0.32 | 1.10 | 0.55 | 1.97 | 0.06 | 1.19 | 0.22 | 2.48 | 0.00 | NA       | NA                                                                     |
| lf_TUBS00X_005101H.TM.SCF_307 | 0.27 | 0.02 | 0.22 | 0.03 | 0.14 | 0.02 | 0.43 | 0.10 | 1.74 | 0.02 | 1.70 | 0.02 | 1.92 | 0.01 | 2.63 | 0.00 | NA       | NA                                                                     |
| MICRO3268.C1_1043             | 0.78 | 0.01 | 0.48 | 0.01 | 0.48 | 0.01 | 0.48 | 0.01 | 0.48 | 0.01 | 0.48 | 0.01 | 0.48 | 0.01 | 0.48 | 0.01 | AK248632 | nitric acid oxidizing protein 2 [Nicotiana glauca]                     |
| MICRO3258.C2_607              | 0.53 | 0.02 | 0.64 | 0.04 | 0.48 | 0.01 | 0.62 | 0.05 | 2.92 | 0.00 | 1.72 | 0.02 | 1.88 | 0.04 | 1.86 | 0.03 | AM459161 | ATMPK9 [Arabidopsis thaliana]                                          |
| MICRO6747.C5_548              | 0.42 | 0.03 | 0.57 | 0.01 | 0.70 | 0.05 | 0.42 | 0.07 | 1.28 | 0.00 | 1.82 | 0.04 | 2.04 | 0.01 | 1.98 | 0.00 | NA       | NA                                                                     |
| MICRO1603.C1_307              | 0.72 | 0.13 | 0.71 | 0.13 | 0.79 | 0.55 | 0.73 | 0.20 | 1.93 | 0.30 | 1.28 | 0.28 | 1.22 | 0.63 | 2.04 | 0.01 | BT019620 | unknown protein [Arabidopsis thaliana]                                 |
| MICRO7720.C1_678              | 0.53 | 0.07 | 0.58 | 0.22 | 0.43 | 0.01 | 0.41 | 0.07 | 2.17 | 0.0  |      |      |      |      |      |      |          |                                                                        |

|                                  |      |      |      |      |      |      |      |      |       |      |      |      |      |      |       |          |          |
|----------------------------------|------|------|------|------|------|------|------|------|-------|------|------|------|------|------|-------|----------|----------|
| bf. araxxxx_0083a10.17m.scd_685  | 0.85 | 0.21 | 0.72 | 0.21 | 0.67 | 0.05 | 0.68 | 0.18 | 1.33  | 0.10 | 1.31 | 0.13 | 1.43 | 0.05 | 1.78  | 0.01     | NA       |
| MICRO_10626.C1_1240              | 0.42 | 0.04 | 0.42 | 0.42 | 0.27 | 0.08 | 0.51 | 0.19 | 1.44  | 0.09 | 1.58 | 0.16 | 1.23 | 0.38 | 1.81  | 0.21     | NA       |
| MICRO_2296.C1_246                | 0.10 | 0.01 | 0.10 | 0.10 | 0.11 | 0.01 | 0.22 | 0.02 | 4.92  | 0.01 | 4.85 | 0.01 | 3.97 | 0.01 | 2.01  | 0.01     | NA       |
| Pvotr0506.scd_400                | 0.09 | 0.00 | 0.25 | 0.00 | 0.45 | 0.19 | 1.53 | 0.29 | 1.03  | 0.79 | 2.74 | 0.18 | 5.05 | 0.00 | 29.22 | 0.01     | NA       |
| MICRO_7593.C1_798                | 0.45 | 0.11 | 0.56 | 0.14 | 0.59 | 0.10 | 0.60 | 0.20 | 1.37  | 0.12 | 1.37 | 0.08 | 1.57 | 0.04 | 2.33  | 0.01     | NA       |
| MICRO_339.C1_340                 | 0.10 | 0.01 | 0.10 | 0.10 | 0.10 | 0.01 | 0.20 | 0.01 | 1.59  | 0.01 | 1.53 | 0.01 | 1.32 | 0.01 | 4.01  | 0.01     | NA       |
| MICRO_1081.C25_1065              | 0.32 | 0.00 | 0.56 | 0.01 | 0.45 | 0.00 | 0.30 | 0.00 | 1.98  | 0.00 | 2.14 | 0.01 | 1.66 | 0.02 | 2.49  | 0.01     | AF090271 |
| POAB1907F_351                    | 0.18 | 0.00 | 0.28 | 0.00 | 0.22 | 0.00 | 0.55 | 0.01 | 1.66  | 0.02 | 2.14 | 0.00 | 2.80 | 0.04 | 9.61  | 0.01     | NA       |
| MICRO_2296.C1_434                | 0.24 | 0.01 | 0.31 | 0.01 | 0.26 | 0.01 | 0.45 | 0.01 | 2.61  | 0.01 | 2.87 | 0.01 | 2.19 | 0.01 | 2.07  | 0.01     | NA       |
| MICRO_416.C13_1087               | 0.45 | 0.00 | 0.62 | 0.01 | 0.67 | 0.03 | 1.04 | 0.76 | 1.30  | 0.30 | 1.94 | 0.11 | 2.26 | 0.00 | 6.62  | 0.00     | DQ200394 |
| MICRO_17603.C1_124               | 0.62 | 0.01 | 0.66 | 0.04 | 0.71 | 0.04 | 0.56 | 0.01 | 1.91  | 0.01 | 1.81 | 0.01 | 2.01 | 0.01 | 1.67  | 0.00     | AF008127 |
| MICRO_1564.C1_484                | 0.20 | 0.00 | 0.21 | 0.00 | 0.21 | 0.00 | 0.36 | 0.01 | 1.85  | 0.01 | 2.58 | 0.00 | 1.86 | 0.01 | 2.84  | 0.01     | NA       |
| MICRO_432.C9_610                 | 0.56 | 0.08 | 0.56 | 0.02 | 0.30 | 0.01 | 0.30 | 0.01 | 6.08  | 0.00 | 3.47 | 0.00 | 1.39 | 0.10 | 1.20  | 0.06     | NA       |
| MICRO_12406.C1_533               | 0.57 | 0.04 | 0.48 | 0.00 | 0.68 | 0.21 | 0.33 | 0.00 | 1.56  | 0.02 | 1.27 | 0.19 | 1.26 | 0.05 | 1.43  | 0.03     | NA       |
| bf. mxtxxxx_00310a10.13m.scd_188 | 0.81 | 0.11 | 0.68 | 0.04 | 0.80 | 0.06 | 1.18 | 0.27 | 1.13  | 0.44 | 1.50 | 0.02 | 1.58 | 0.02 | 4.35  | 0.00     | DQ241844 |
| ESTC4274_53                      | 0.29 | 0.03 | 0.25 | 0.11 | 0.30 | 0.06 | 0.75 | 0.46 | 2.04  | 0.01 | 1.51 | 0.09 | 2.69 | 0.00 | 3.33  | 0.00     | AF060681 |
| STMH471V_755                     | 0.21 | 0.00 | 0.29 | 0.04 | 0.29 | 0.00 | 0.34 | 0.01 | 2.80  | 0.00 | 2.86 | 0.00 | 2.38 | 0.00 | 2.18  | 0.00     | NA       |
| MICRO_2296.C1_729                | 0.52 | 0.01 | 0.62 | 0.02 | 0.64 | 0.18 | 0.44 | 0.01 | 1.47  | 0.03 | 1.62 | 0.04 | 1.86 | 0.03 | 1.84  | 0.03     | NA       |
| STMH471V_886                     | 1.11 | 0.78 | 0.74 | 0.10 | 0.93 | 0.01 | 0.47 | 0.01 | 0.96  | 0.78 | 1.61 | 0.01 | 1.90 | 0.04 | 1.78  | 0.01     | NA       |
| STMH471V_793                     | 0.49 | 0.00 | 0.56 | 0.06 | 0.65 | 0.02 | 0.66 | 0.06 | 1.46  | 0.04 | 1.42 | 0.15 | 1.14 | 0.22 | 1.85  | 0.00     | CU074307 |
| POC38697V_36                     | 0.15 | 0.04 | 0.36 | 0.07 | 0.36 | 0.07 | 0.31 | 0.07 | 4.94  | 0.00 | 3.46 | 0.00 | 3.04 | 0.00 | 2.53  | 0.03     | NA       |
| MICRO_5462.C1_786                | 0.31 | 0.12 | 0.22 | 0.02 | 0.12 | 0.00 | 0.22 | 0.00 | 1.95  | 0.04 | 1.35 | 0.32 | 2.78 | 0.03 | 2.12  | 0.00     | NA       |
| MICRO_7598.C2_712                | 0.62 | 0.01 | 0.85 | 0.44 | 0.01 | 0.79 | 0.11 | 1.21 | 0.19  | 1.57 | 0.02 | 1.43 | 0.02 | 3.11 | 0.00  | AK224626 |          |
| bf. swstxxxx_005501.13m.scd_536  | 0.23 | 0.01 | 0.30 | 0.08 | 0.33 | 0.05 | 0.42 | 0.14 | 4.44  | 0.00 | 3.55 | 0.03 | 3.71 | 0.00 | 3.89  | 0.00     | NA       |
| bf. araxxxx_0017601.17m.scd_536  | 0.26 | 0.00 | 0.64 | 0.58 | 0.28 | 0.01 | 0.68 | 0.19 | 0.87  | 0.38 | 2.46 | 0.01 | 1.89 | 0.01 | 3.32  | 0.00     | NA       |
| MICRO_212.C3_1277                | 0.81 | 0.11 | 0.66 | 0.04 | 0.54 | 0.08 | 0.64 | 0.06 | 1.33  | 0.14 | 1.46 | 0.05 | 1.05 | 0.68 | 1.38  | 0.05     | DQ218276 |
| MICRO_3921.C2_483                | 0.72 | 0.29 | 0.58 | 0.11 | 0.72 | 0.12 | 0.68 | 0.19 | 2.01  | 0.01 | 1.30 | 0.32 | 1.80 | 0.01 | 1.09  | 0.74     | NA       |
| MICRO_1968.C2_230                | 0.08 | 0.02 | 0.22 | 0.08 | 0.10 | 0.03 | 0.17 | 0.13 | 3.15  | 0.02 | 2.74 | 0.01 | 2.89 | 0.06 | 2.21  | 0.01     | AM467842 |
| MICRO_414.C2_1031                | 0.26 | 0.07 | 0.22 | 0.01 | 0.18 | 0.01 | 0.35 | 0.07 | 9.59  | 0.00 | 7.19 | 0.00 | 5.89 | 0.00 | 2.72  | 0.06     | DQ118095 |
| MICRO_1081.C16_798               | 0.13 | 0.01 | 0.30 | 0.04 | 0.28 | 0.20 | 0.55 | 0.15 | 2.83  | 0.06 | 2.95 | 0.13 | 3.01 | 0.07 | 3.56  | 0.00     | NA       |
| MICRO_1643.C1_3                  | 0.43 | 0.03 | 0.42 | 0.03 | 0.47 | 0.05 | 0.63 | 0.01 | 1.66  | 0.25 | 1.67 | 0.05 | 1.32 | 0.02 | 1.82  | 0.00     | NA       |
| bf. cswtxxxx_002308.13m.scd_606  | 0.43 | 0.00 | 0.58 | 0.02 | 0.67 | 0.25 | 0.42 | 0.00 | 3.04  | 0.00 | 2.90 | 0.02 | 1.89 | 0.00 | 1.24  | 0.14     | NA       |
| EPRO13177H_483                   | 0.60 | 0.03 | 0.72 | 0.17 | 0.93 | 0.08 | 0.66 | 0.14 | 1.46  | 0.05 | 1.40 | 0.14 | 1.43 | 0.07 | 2.00  | 0.02     | BT031353 |
| MICRO_7471.C4_834                | 0.08 | 0.01 | 0.08 | 0.01 | 0.08 | 0.01 | 0.14 | 0.01 | 1.04  | 0.01 | 1.04 | 0.01 | 1.77 | 0.01 | 1.71  | 0.01     | NA       |
| SSBTO204x.scd_609                | 0.46 | 0.02 | 0.55 | 0.07 | 0.42 | 0.02 | 0.41 | 0.25 | 2.00  | 0.02 | 1.82 | 0.02 | 1.55 | 0.02 | 1.85  | 0.06     | NA       |
| MICRO_4828.C1_484                | 0.54 | 0.01 | 0.53 | 0.16 | 0.26 | 0.04 | 0.50 | 0.08 | 2.46  | 0.07 | 2.64 | 0.01 | 2.25 | 0.00 | 2.47  | 0.00     | NA       |
| MICRO_1226.C1_989                | 0.43 | 0.00 | 0.63 | 0.00 | 0.63 | 0.00 | 0.63 | 0.00 | 1.58  | 0.02 | 1.58 | 0.00 | 1.70 | 0.00 | 1.74  | 0.00     | NA       |
| bf. araxxxx_001501.17m.scd_731   | 0.67 | 0.05 | 0.62 | 0.03 | 0.90 | 0.71 | 0.30 | 0.26 | 0.00  | 2.83 | 0.01 | 2.31 | 0.00 | 0.98 | 0.87  | NA       |          |
| MICRO_1081.C18_1218              | 0.34 | 0.04 | 0.47 | 0.22 | 0.54 | 0.02 | 0.59 | 0.06 | 2.18  | 0.01 | 1.58 | 0.08 | 1.82 | 0.01 | 2.40  | 0.02     | AF090271 |
| MICRO_2296.CM_450                | 0.13 | 0.01 | 0.20 | 0.01 | 0.20 | 0.01 | 0.20 | 0.01 | 0.89  | 0.01 | 0.89 | 0.01 | 0.84 | 0.01 | 1.44  | 0.01     | NA       |
| MICRO_6533.C2_955                | 0.60 | 0.02 | 0.51 | 0.01 | 0.69 | 0.22 | 0.30 | 0.30 | 1.10  | 0.21 | 1.69 | 0.04 | 1.64 | 0.03 | 1.37  | 0.05     | AF060681 |
| MICRO_17607.C1_302               | 0.71 | 0.33 | 0.45 | 0.05 | 0.28 | 0.02 | 0.44 | 0.05 | 1.59  | 0.14 | 2.20 | 0.00 | 1.59 | 0.08 | 1.66  | 0.03     | AJ457052 |
| MICRO_1227.C1_690                | 0.27 | 0.02 | 0.39 | 0.01 | 0.49 | 0.00 | 0.38 | 0.01 | 1.97  | 0.01 | 2.80 | 0.00 | 2.51 | 0.00 | 2.91  | 0.00     | AF269684 |
| MICRO_6211.C1_234                | 0.35 | 0.08 | 0.32 | 0.18 | 0.33 | 0.02 | 0.35 | 0.11 | 1.33  | 0.11 | 1.42 | 0.01 | 1.54 | 0.01 | 5.00  | 0.00     | NA       |
| MICRO_413.C1_1341                | 0.75 | 0.16 | 0.78 | 0.17 | 0.77 | 0.06 | 0.58 | 0.04 | 1.62  | 0.04 | 2.13 | 0.01 | 1.99 | 0.00 | 1.03  | 0.84     | AY748245 |
| MICRO_250.C2_719                 | 0.53 | 0.01 | 0.42 | 0.01 | 0.99 | 0.94 | 0.75 | 0.10 | 2.55  | 0.00 | 1.81 | 0.08 | 2.29 | 0.00 | 2.03  | 0.22     | BT031398 |
| MICRO_1092.C1_158                | 0.22 | 0.00 | 0.22 | 0.00 | 0.22 | 0.00 | 0.22 | 0.00 | 0.96  | 0.02 | 0.96 | 0.01 | 0.96 | 0.01 | 1.93  | 0.01     | NA       |
| ESTB48M1H_370                    | 0.35 | 0.00 | 0.31 | 0.03 | 0.34 | 0.00 | 0.51 | 0.03 | 1.73  | 0.13 | 2.69 | 0.03 | 2.65 | 0.04 | 4.91  | 0.00     | AC145120 |
| MICRO_2296.C26_796               | 0.36 | 0.00 | 0.18 | 0.00 | 0.10 | 0.00 | 0.16 | 0.01 | 4.29  | 0.00 | 3.89 | 0.00 | 3.16 | 0.00 | 2.04  | 0.01     | NA       |
| MICRO_7625.C1_1438               | 0.54 | 0.03 | 0.66 | 0.03 | 0.54 | 0.03 | 0.66 | 0.03 | 1.62  | 0.03 | 1.60 | 0.01 | 1.78 | 0.01 | 1.80  | 0.01     | NA       |
| bf. swstxxxx_005904.13m.scd_492  | 0.07 | 0.01 | 0.21 | 0.02 | 0.08 | 0.02 | 0.27 | 0.04 | 6.07  | 0.00 | 4.31 | 0.00 | 3.23 | 0.01 | 2.26  | 0.01     | NA       |
| bf. swstxxxx_002807.13m.scd_486  | 0.25 | 0.01 | 0.34 | 0.10 | 0.13 | 0.09 | 0.19 | 0.15 | 6.02  | 0.01 | 5.42 | 0.05 | 4.72 | 0.01 | 3.70  | 0.00     | NA       |
| STMES97V_473                     | 0.48 | 0.01 | 0.49 | 0.01 | 0.47 | 0.01 | 0.47 | 0.01 | 2.07  | 0.01 | 1.78 | 0.02 | 1.49 | 0.01 | 1.59  | 0.01     | AC151803 |
| MICRO_3768.C1_703                | 0.32 | 0.00 | 0.34 | 0.01 | 0.45 | 0.06 | 0.47 | 0.02 | 2.91  | 0.05 | 1.94 | 0.11 | 1.27 | 0.11 | 3.62  | 0.02     | DQ228326 |
| STMVC77V_202                     | 0.21 | 0.01 | 0.33 | 0.12 | 0.12 | 0.02 | 0.48 | 0.14 | 1.98  | 0.10 | 1.48 | 0.12 | 2.39 | 0.00 | 4.10  | 0.01     | NA       |
| MICRO_598.C5_61                  | 0.30 | 0.01 | 0.38 | 0.01 | 0.38 | 0.01 | 0.51 | 0.01 | 1.69  | 0.03 | 1.94 | 0.02 | 1.58 | 0.01 | 3.64  | 0.00     | DQ228326 |
| MICRO_4058.C1_1748               | 0.41 | 0.00 | 0.90 | 0.60 | 0.61 | 0.02 | 0.90 | 0.41 | 1.00  | 0.98 | 2.03 | 0.01 | 1.57 | 0.01 | 3.25  | 0.00     | NA       |
| MICRO_4372.C19_298               | 0.25 | 0.00 | 0.38 | 0.00 | 0.38 | 0.00 | 0.34 | 0.05 | 1.88  | 0.00 | 1.84 | 0.00 | 2.02 | 0.00 | 2.52  | 0.00     | AF090270 |
| MICRO_1973.C1_698                | 0.20 | 0.03 | 0.16 | 0.02 | 0.18 | 0.01 | 0.42 | 0.09 | 1.95  | 0.01 | 1.66 | 0.03 | 3.16 | 0.00 | 2.10  | 0.01     | NA       |
| STMEL27V_1                       | 0.63 | 0.02 | 0.87 | 0.34 | 0.95 | 0.69 | 0.63 | 0.03 | 1.07  | 0.71 | 1.61 | 0.02 | 1.30 | 0.08 | 1.46  | 0.03     | NA       |
| bf. mxtxxxx_009607.13m.scd_644   | 0.15 | 0.00 | 0.46 | 0.13 | 0.32 | 0.03 | 0.63 | 0.17 | 1.53  | 0.06 | 1.67 | 0.04 | 1.85 | 0.01 | 1.77  | 0.06     | AF090280 |
| MICRO_1088.C1_689                | 0.12 | 0.02 | 0.36 | 0.11 | 0.16 | 0.03 | 0.43 | 0.14 | 2.31  | 0.01 | 5.54 | 0.00 | 3.72 | 0.01 | 15.03 | 0.00     | NA       |
| bf. araxxxx_008612.17m.scd_1     | 0.19 | 0.00 | 0.11 | 0.00 | 0.14 | 0.00 | 0.30 | 0.03 | 12.27 | 0.00 | 5.51 | 0.02 | 4.58 | 0.00 | 2.30  | 0.01     | NA       |
| MICRO_409.C12_56                 | 0.53 | 0.01 | 0.67 | 0.06 | 0.80 | 0.15 | 0.70 | 0.06 | 1.71  | 0.02 | 1.80 | 0.04 | 1.77 | 0.00 | 2.39  | 0.00     | DQ191654 |
| SSBNO1026x.scd_443               | 0.27 | 0.00 | 0.38 | 0.01 | 0.51 | 0.01 | 0.44 | 0.36 | 1.18  | 0.28 | 1.40 | 0.07 | 1.23 | 0.14 | 1.81  | 0.01     | NA       |
| MICRO_11493.C2_700               | 0.35 | 0.00 | 0.49 | 0.01 | 0.67 | 0.17 | 0.62 | 0.03 | 1.48  | 0.25 | 1.85 | 0.00 | 2.69 | 0.00 | 3.33  | 0.00     | AM452493 |
| MICRO_708.C12_635                | 0.48 | 0.06 | 0.21 | 0.03 | 0.25 | 0.03 | 0.17 | 0.12 | 2.39  | 0.02 | 1.92 | 0.01 | 2.44 | 0.00 | 1.43  | 0.15     | DQ224843 |
| MICRO_720.C1_968                 | 0.38 | 0.00 | 0.53 | 0.01 | 0.60 | 0.08 | 0.41 | 0.01 | 1.80  | 0.01 | 1.78 | 0.01 | 1.67 | 0.00 | 1.36  | 0.13     | AC151803 |
| MICRO_1564.C1_690                | 0.38 | 0.01 | 0.31 | 0.00 | 0.56 | 0.00 | 0.43 | 0.28 | 1.18  | 0.23 | 1.24 | 0.18 | 1.66 | 0.01 | 2.36  | 0.00     | NA       |
| POC3867P_917                     | 0.49 | 0.00 | 0.60 | 0.19 | 0.46 | 0.00 | 0.62 | 0.04 | 2.00  | 0.02 | 2.31 | 0.00 | 2.11 | 0.00 | 1.31  | 0.19     | NA       |
| 148B114F.scd_637                 | 0    |      |      |      |      |      |      |      |       |      |      |      |      |      |       |          |          |

| Probe ID                       | Hmgmt 1    |               | Hmgmt 2    |               | Hmgmt 3    |               | Hmgmt 4    |               | Hmgmt 5    |               | GenBank | Description |      |      |       |                                                                                                                               |              |      |
|--------------------------------|------------|---------------|------------|---------------|------------|---------------|------------|---------------|------------|---------------|---------|-------------|------|------|-------|-------------------------------------------------------------------------------------------------------------------------------|--------------|------|
|                                | Normalized | Least P-value |         |             |      |      |       |                                                                                                                               |              |      |
| TBS02719FD0313m scf 317        | 0.67       | 0.01          | 0.91       | 0.84          | 0.83       | 0.25          | 1.95       | 0.01          | 0.96       | 0.78          | 0.93    | 0.66        | 1.32 | 0.17 | NA    | DNA topoisomerase II. Serine/threonine-specific protein phosphatase and bis(5-nucleosyl)-tetraphosphate (Medicago truncatula) |              |      |
| AC004781029.13m scf 81         | 0.54       | 0.00          | 0.84       | 0.17          | 0.43       | 0.93          | 1.74       | 0.00          | 0.91       | 0.53          | 0.81    | 0.32        | 0.17 | 0.04 | NA    | unannotated protein (Arabidopsis thaliana)                                                                                    |              |      |
| MCR010231.C2_1543              | 0.65       | 0.00          | 0.75       | 0.05          | 0.99       | 0.94          | 1.62       | 0.02          | 0.71       | 0.07          | 0.85    | 0.15        | 1.51 | 0.04 | 2.42  | 0.00                                                                                                                          | AT5G56314    |      |
| bl. vsmexoe_000902031m scf 41  | 0.65       | 0.01          | 0.89       | 0.05          | 0.99       | 0.94          | 1.62       | 0.02          | 0.71       | 0.07          | 0.85    | 0.15        | 1.51 | 0.04 | 2.42  | 0.00                                                                                                                          | AT5G56314    |      |
| bl. vsmexoe_000902031m scf 140 | 0.68       | 0.03          | 0.82       | 0.19          | 1.06       | 0.74          | 2.25       | 0.00          | 0.89       | 0.38          | 0.91    | 0.50        | 0.96 | 0.09 | 1.96  | 0.00                                                                                                                          | AT5G56314    |      |
| MCR01942.C3_342                | 0.78       | 0.07          | 0.85       | 0.22          | 0.98       | 0.89          | 2.60       | 0.00          | 0.76       | 0.09          | 0.77    | 0.11        | 1.03 | 0.86 | 1.65  | 0.02                                                                                                                          | CG225162     |      |
| bl. vsmexoe_000903103m scf 614 | 0.68       | 0.03          | 0.83       | 0.26          | 0.98       | 0.71          | 2.02       | 0.00          | 0.82       | 0.22          | 0.82    | 0.30        | 1.20 | 0.20 | 2.14  | 0.00                                                                                                                          | NA           |      |
| MCR01987.C2_1026               | 0.70       | 0.04          | 0.81       | 0.44          | 0.76       | 0.11          | 1.06       | 0.61          | 0.86       | 0.36          | 1.05    | 0.11        | 1.41 | 0.06 | 1.84  | 0.01                                                                                                                          | NM_001049281 |      |
| MCR01987.C2_1026               | 0.67       | 0.04          | 0.80       | 0.44          | 0.76       | 0.11          | 1.06       | 0.61          | 0.86       | 0.36          | 1.05    | 0.11        | 1.41 | 0.06 | 1.84  | 0.01                                                                                                                          | NM_001049281 |      |
| MCR012932.C1_697               | 0.55       | 0.01          | 0.76       | 0.14          | 0.93       | 0.66          | 3.17       | 0.00          | 0.77       | 0.14          | 0.96    | 0.80        | 1.40 | 0.07 | 3.13  | 0.00                                                                                                                          | U78394       |      |
| bl. vsmexoe_001506070m scf 692 | 0.45       | 0.02          | 0.82       | 0.42          | 0.93       | 0.70          | 1.85       | 0.26          | 0.72       | 0.25          | 1.04    | 0.84        | 0.89 | 0.98 | 1.51  | 0.32                                                                                                                          | NA           |      |
| MCR02292.C1_1150               | 0.64       | 0.05          | 0.86       | 0.30          | 0.94       | 0.74          | 2.07       | 0.00          | 0.80       | 0.66          | 0.63    | 0.00        | 0.84 | 0.72 | 1.81  | 0.00                                                                                                                          | CG242525     |      |
| MCR01746.C3_1559               | 0.76       | 0.17          | 0.88       | 0.67          | 1.04       | 0.80          | 4.39       | 0.00          | 0.87       | 0.05          | 0.85    | 0.37        | 0.94 | 0.76 | 2.32  | 0.00                                                                                                                          | BT012706     |      |
| MCR02984.C2_319                | 0.97       | 0.01          | 0.88       | 0.36          | 0.94       | 0.61          | 1.88       | 0.00          | 0.92       | 0.05          | 0.90    | 0.35        | 1.07 | 0.48 | 1.71  | 0.01                                                                                                                          | NA           |      |
| 1684075643_304                 | 0.81       | 0.52          | 0.98       | 0.87          | 1.07       | 0.58          | 2.92       | 0.00          | 0.88       | 0.08          | 0.90    | 0.36        | 0.97 | 0.82 | 1.84  | 0.01                                                                                                                          | NA           |      |
| MCR01941.C1_663                | 0.66       | 0.01          | 0.81       | 0.32          | 0.81       | 0.66          | 1.85       | 0.01          | 0.81       | 0.03          | 0.83    | 0.48        | 1.63 | 0.60 | 1.07  | 0.04                                                                                                                          | NA           |      |
| MCR01132.C1_1266               | 0.92       | 0.46          | 1.04       | 0.81          | 0.93       | 0.61          | 1.48       | 0.02          | 0.80       | 0.15          | 1.10    | 0.48        | 0.92 | 0.56 | 1.43  | 0.03                                                                                                                          | BT014590     |      |
| MCR01761.C2_538                | 0.92       | 0.01          | 0.81       | 0.32          | 0.88       | 0.64          | 1.85       | 0.01          | 0.81       | 0.47          | 0.87    | 0.99        | 1.36 | 0.08 | 2.83  | 0.00                                                                                                                          | AA043559     |      |
| TBS02719FD0313m scf 11         | 0.62       | 0.01          | 0.86       | 0.24          | 1.04       | 0.88          | 3.00       | 0.00          | 0.45       | 0.00          | 0.77    | 0.11        | 1.08 | 0.56 | 2.01  | 0.01                                                                                                                          | CG207880     |      |
| AC040994986.73m scf 314        | 0.78       | 0.22          | 0.75       | 0.05          | 0.98       | 0.85          | 4.87       | 0.00          | 0.61       | 0.91          | 0.92    | 0.57        | 1.30 | 0.20 | 3.98  | 0.00                                                                                                                          | AK224822     |      |
| CS1D1413111_624                | 0.83       | 0.68          | 0.87       | 0.34          | 1.03       | 0.82          | 2.13       | 0.00          | 0.93       | 0.75          | 0.91    | 0.41        | 1.12 | 0.31 | 2.12  | 0.01                                                                                                                          | BT010103     |      |
| bl. vsmexoe_001041111m scf 450 | 0.68       | 0.06          | 0.80       | 0.68          | 1.04       | 0.77          | 2.05       | 0.00          | 1.05       | 0.74          | 1.05    | 0.81        | 0.88 | 0.70 | 1.78  | 0.02                                                                                                                          | NA           |      |
| bl. vsmexoe_000816111m scf 195 | 0.65       | 0.01          | 0.82       | 0.78          | 0.91       | 0.29          | 3.02       | 0.00          | 0.54       | 0.00          | 0.90    | 0.50        | 0.88 | 0.69 | 1.88  | 0.01                                                                                                                          | CG216122     |      |
| MCR01874.C2_26                 | 0.19       | 0.00          | 0.57       | 0.03          | 0.90       | 0.79          | 8.39       | 0.00          | 0.86       | 0.58          | 0.88    | 0.33        | 1.43 | 0.35 | 8.11  | 0.00                                                                                                                          | AT786773     |      |
| bl. vsmexoe_000602070m scf 546 | 0.63       | 0.16          | 0.71       | 0.24          | 0.83       | 0.16          | 1.78       | 0.00          | 0.84       | 0.64          | 0.84    | 0.72        | 1.06 | 0.61 | 2.13  | 0.00                                                                                                                          | NM_118347    |      |
| MCR01893.C6_418                | 0.94       | 0.01          | 1.03       | 0.83          | 1.06       | 0.68          | 2.70       | 0.00          | 0.99       | 0.06          | 0.90    | 0.26        | 0.92 | 0.68 | 1.94  | 0.03                                                                                                                          | AA043066     |      |
| bl. vsmexoe_00050711m scf 522  | 0.17       | 0.00          | 0.46       | 0.00          | 0.55       | 0.24          | 3.58       | 0.01          | 0.85       | 0.20          | 1.17    | 0.54        | 1.44 | 0.09 | 6.18  | 0.00                                                                                                                          | BT01819      |      |
| MCR01892.C2_1171               | 0.99       | 0.84          | 1.00       | 0.84          | 0.93       | 0.20          | 2.12       | 0.01          | 0.92       | 0.48          | 0.92    | 0.72        | 0.66 | 0.77 | 1.88  | 0.04                                                                                                                          | AA043662     |      |
| MCR01482.C3_144                | 0.48       | 0.01          | 0.77       | 0.14          | 0.98       | 0.87          | 2.50       | 0.00          | 0.89       | 0.47          | 0.91    | 0.48        | 1.24 | 0.15 | 2.31  | 0.00                                                                                                                          | NA           |      |
| MCR01708.C2_572                | 0.34       | 0.00          | 1.57       | 0.09          | 0.69       | 0.20          | 3.80       | 0.00          | 0.58       | 0.01          | 0.95    | 0.61        | 0.89 | 0.57 | 2.50  | 0.00                                                                                                                          | BT014113     |      |
| RF. LIRCH00X_000001 TMSLC2_313 | 0.64       | 0.02          | 0.81       | 0.23          | 0.80       | 0.62          | 0.94       | 0.00          | 0.92       | 0.64          | 0.90    | 0.23        | 0.98 | 0.33 | 0.93  | 0.00                                                                                                                          | CG216122     |      |
| MCR01903.C3_963                | 0.64       | 0.01          | 1.11       | 0.44          | 1.23       | 0.23          | 2.09       | 0.00          | 0.68       | 0.03          | 0.75    | 0.13        | 0.94 | 0.56 | 1.94  | 0.02                                                                                                                          | CG204269     |      |
| MCR01548.C1_1123               | 0.78       | 0.19          | 0.77       | 0.28          | 0.88       | 0.61          | 1.77       | 0.00          | 0.82       | 0.77          | 0.82    | 0.51        | 1.28 | 0.19 | 2.17  | 0.00                                                                                                                          | CG216122     |      |
| MCR01206.C1_2829               | 0.99       | 0.01          | 0.80       | 0.44          | 0.85       | 0.23          | 2.89       | 0.00          | 0.82       | 0.25          | 1.05    | 0.67        | 0.88 | 0.51 | 2.09  | 0.01                                                                                                                          | AA051290     |      |
| bl. vsmexoe_001802070m scf 78  | 0.59       | 0.01          | 0.88       | 0.39          | 0.92       | 0.64          | 3.10       | 0.00          | 0.73       | 0.09          | 0.86    | 0.70        | 0.97 | 0.90 | 2.00  | 0.01                                                                                                                          | CG225213     |      |
| POK02371_586                   | 0.77       | 0.07          | 0.81       | 1.13          | 0.82       | 0.29          | 1.82       | 0.01          | 0.81       | 0.15          | 0.89    | 0.24        | 1.08 | 0.28 | 1.94  | 0.00                                                                                                                          | NA           |      |
| MCR01898.C2_47                 | 0.96       | 0.84          | 1.15       | 0.87          | 1.48       | 0.07          | 2.28       | 0.01          | 0.34       | 0.05          | 0.96    | 0.17        | 0.89 | 0.71 | 1.70  | 0.14                                                                                                                          | BB0859       |      |
| bl. vsmexoe_00040410m scf 16   | 0.65       | 0.01          | 0.80       | 0.65          | 0.95       | 0.84          | 2.13       | 0.00          | 0.79       | 0.13          | 0.99    | 0.89        | 1.39 | 0.00 | 1.71  | 0.00                                                                                                                          | NA           |      |
| MCR01895.C1_688                | 0.60       | 0.01          | 0.80       | 0.65          | 0.95       | 0.84          | 2.13       | 0.00          | 0.79       | 0.13          | 0.99    | 0.89        | 1.39 | 0.00 | 1.71  | 0.00                                                                                                                          | CG224287     |      |
| MCR01741.C1_1310               | 0.36       | 0.00          | 0.63       | 0.08          | 0.64       | 0.01          | 1.39       | 0.08          | 0.88       | 0.32          | 1.21    | 0.28        | 1.41 | 0.03 | 1.63  | 0.01                                                                                                                          | BT014287     |      |
| bl. vsmexoe_00090410m scf 366  | 0.38       | 0.00          | 0.63       | 0.09          | 0.63       | 0.09          | 1.39       | 0.08          | 0.88       | 0.32          | 1.21    | 0.28        | 1.41 | 0.03 | 1.63  | 0.01                                                                                                                          | BT014287     |      |
| bl. vsmexoe_00040810m scf 486  | 0.71       | 0.10          | 0.87       | 0.14          | 0.74       | 0.29          | 3.24       | 0.00          | 0.77       | 0.13          | 0.80    | 0.23        | 1.00 | 1.98 | 0.01  | CG203332                                                                                                                      |              |      |
| bl. vsmexoe_00040810m scf 507  | 0.79       | 0.10          | 0.87       | 0.14          | 0.74       | 0.29          | 3.24       | 0.00          | 0.77       | 0.13          | 0.80    | 0.23        | 1.00 | 1.98 | 0.01  | CG203332                                                                                                                      |              |      |
| bl. vsmexoe_00050810m scf 688  | 0.75       | 0.07          | 0.86       | 0.30          | 0.95       | 0.71          | 1.89       | 0.01          | 1.06       | 0.87          | 1.05    | 0.72        | 1.18 | 0.22 | 1.77  | 0.02                                                                                                                          | AA051917     |      |
| CS18303177H_288                | 1.01       | 0.92          | 0.95       | 0.81          | 1.16       | 0.36          | 1.44       | 0.04          | 0.87       | 0.43          | 0.91    | 0.56        | 0.89 | 0.91 | 1.71  | 0.43                                                                                                                          | BT013602     |      |
| MCR01904.C1_809                | 0.76       | 0.01          | 0.86       | 0.13          | 1.04       | 0.81          | 3.84       | 0.00          | 0.80       | 0.13          | 0.80    | 0.11        | 1.04 | 0.84 | 0.00  | 0.11                                                                                                                          | 1.04         | 0.84 |
| MCR01910.C1_1078               | 1.08       | 0.64          | 1.15       | 0.29          | 0.87       | 0.13          | 1.75       | 0.04          | 1.06       | 0.77          | 0.84    | 0.42        | 1.15 | 0.46 | 2.40  | 0.01                                                                                                                          | AA050011     |      |
| MCR01910.C1_1078               | 0.81       | 0.07          | 0.81       | 0.29          | 0.87       | 0.13          | 1.75       | 0.04          | 1.06       | 0.77          | 0.84    | 0.42        | 1.15 | 0.46 | 2.40  | 0.01                                                                                                                          | AA050011     |      |
| MCR01712.C1_1579               | 0.47       | 0.01          | 0.58       | 0.02          | 0.83       | 0.45          | 3.31       | 0.00          | 0.82       | 0.32          | 0.88    | 0.40        | 0.35 | 1.00 | 0.00  | 0.00                                                                                                                          | AA110551     |      |
| MCR01903.C6_538                | 0.36       | 0.00          | 0.80       | 0.29          | 1.01       | 0.88          | 3.78       | 0.00          | 0.49       | 0.00          | 1.01    | 0.97        | 0.87 | 0.88 | 2.44  | 0.00                                                                                                                          | CG209287     |      |
| MCR01903.C6_538                | 0.44       | 0.00          | 0.71       | 0.05          | 0.92       | 0.72          | 1.87       | 0.03          | 0.82       | 0.19          | 0.88    | 0.37        | 1.34 | 0.38 | 1.92  | 0.00                                                                                                                          | CG216122     |      |
| MCR01882.C1_692                | 0.39       | 0.00          | 0.23       | 0.01          | 0.31       | 0.01          | 1.57       | 0.13          | 0.20       | 0.56          | 1.21    | 0.31        | 2.36 | 0.02 | 11.80 | 0.00                                                                                                                          | NA           |      |
| MCR01882.C1_692                | 0.46       | 0.01          | 0.87       | 0.13          | 0.85       | 0.01          | 1.89       | 0.44          | 0.83       | 0.44          | 0.83    | 0.27        | 1.19 | 0.13 | 1.80  | 0.00                                                                                                                          | CG216122     |      |
| MCR01882.C1_692                | 0.69       | 0.01          | 0.87       | 0.13          | 0.85       | 0.01          | 1.89       | 0.44          | 0.83       | 0.44          | 0.83    | 0.27        | 1.19 | 0.13 | 1.80  | 0.00                                                                                                                          | CG216122     |      |
| 0781054564_319                 | 0.99       | 0.10          | 0.73       | 0.16          | 0.87       | 0.42          | 1.84       | 0.01          | 0.93       | 0.62          | 0.95    | 0.78        | 1.31 | 0.13 | 1.63  | 0.03                                                                                                                          | BT013534     |      |
| POK02371_708                   | 0.99       | 0.02          | 0.86       | 0.30          | 1.02       | 0.81          | 1.88       | 0.04          | 0.85       | 0.50          | 0.82    | 0.61        | 1.48 | 0.03 | 1.63  | 0.00                                                                                                                          | CG203332     |      |
| bl. vsmexoe_00090810m scf 562  | 0.67       | 0.00          | 0.73       | 0.06          | 0.85       | 0.18          | 0.89       | 0.00          | 0.84       | 0.18          | 0.89    | 0.42        | 0.88 | 0.24 | 0.41  | 0.00                                                                                                                          | CG216122     |      |
| BTM027H_886                    | 0.92       | 0.53          | 0.94       | 0.65          | 1.05       | 0.72          | 2.38       | 0.01          | 1.00       | 1.00          | 0.73    | 0.06        | 1.09 | 0.66 | 2.43  | 0.00                                                                                                                          | CG203256     |      |
| MCR01854.C1_443                | 0.67       | 0.01          | 0.88       | 0.37          | 0.98       | 0.60          | 1.40       | 0.00          | 0.88       | 0.46          | 1.04    | 0.78        | 1.16 | 0.24 | 2.40  | 0.00                                                                                                                          | AA043662     |      |
| MCR01854.C1_443                | 0.63       | 0.02          | 0.84       | 0.28          | 1.14       | 0.88          | 1.84       | 0.00          | 0.82       | 0.78          | 0.82    | 0.31        | 1.86 | 0.31 | 1.98  | 0.00                                                                                                                          | CG216122     |      |
| AC040994986.73m scf 11         | 0.67       | 0.04          | 0.84       | 0.29          | 1.00       | 0.89          | 3.22       | 0.00          | 0          |               |         |             |      |      |       |                                                                                                                               |              |      |





|                              |      |      |      |      |      |      |       |      |      |      |      |      |      |      |         |                                                       |                                                            |                                                        |
|------------------------------|------|------|------|------|------|------|-------|------|------|------|------|------|------|------|---------|-------------------------------------------------------|------------------------------------------------------------|--------------------------------------------------------|
| MCRO0605C4_217               | 0.47 | 0.00 | 0.96 | 0.77 | 0.91 | 0.48 | 2.70  | 0.00 | 0.47 | 0.01 | 0.88 | 0.40 | 0.87 | 0.44 | 2.02    | 0.01                                                  | AP006287                                                   | glutathione S-transferase GST z3 (Glycine maud)        |
| MCRO1080A10_10m scf_429      | 0.63 | 0.02 | 0.99 | 0.97 | 0.85 | 0.87 | 0.60  | 0.00 | 0.87 | 0.00 | 0.84 | 0.87 | 0.84 | 0.87 | 0.00    | 0.00                                                  | Q222494                                                    | Q222494                                                |
| MCRO1898C2_267               | 0.79 | 0.09 | 0.90 | 0.85 | 1.07 | 0.65 | 4.07  | 0.00 | 0.78 | 0.13 | 0.93 | 0.65 | 1.06 | 0.71 | 1.00    | 0.00                                                  | Q022494                                                    | unknown (Solanum tuberosum)                            |
| MCRO1383C1_1182              | 0.63 | 0.00 | 1.33 | 0.07 | 0.91 | 0.73 | 3.28  | 0.00 | 0.57 | 0.03 | 0.98 | 0.87 | 0.78 | 0.19 | 1.37    | 0.00                                                  | MA128173                                                   | HS-PTS, DNA-binding (Medicago truncatula)              |
| MCRO0906C1_1195              | 0.77 | 0.04 | 1.10 | 0.64 | 1.02 | 0.72 | 0.64  | 0.00 | 0.71 | 0.03 | 0.83 | 0.66 | 1.07 | 1.00 | 0.00    | 0.00                                                  | Q1014031                                                   | unknown (Solanum tuberosum)                            |
| MCRO0809C1_05m scf_119       | 0.45 | 0.00 | 0.72 | 0.10 | 1.09 | 0.66 | 2.10  | 0.00 | 0.78 | 0.22 | 0.76 | 0.12 | 1.35 | 0.07 | 1.88    | 0.01                                                  | AF125500                                                   | unknown (Solanum tuberosum)                            |
| MCRO1226C2_196               | 0.69 | 0.00 | 0.95 | 0.82 | 0.91 | 0.84 | 1.04  | 0.00 | 0.69 | 0.17 | 0.76 | 0.21 | 0.81 | 0.84 | 0.00    | 0.00                                                  | Q10119532                                                  | unknown (Solanum tuberosum)                            |
| MCRO1661C4_361               | 0.38 | 0.00 | 0.81 | 0.19 | 0.82 | 0.22 | 1.87  | 0.01 | 0.85 | 0.24 | 0.03 | 0.73 | 0.99 | 0.86 | 1.98    | 0.01                                                  | NA                                                         | unknown (Solanum tuberosum)                            |
| MCRO1396C1_1044              | 0.90 | 0.33 | 3.55 | 0.20 | 0.36 | 0.04 | 13.49 | 0.00 | 0.20 | 0.00 | 0.23 | 0.00 | 0.30 | 0.00 | 1.12    | 0.00                                                  | NA                                                         | unknown (Solanum tuberosum)                            |
| PRO114011_733                | 0.48 | 0.00 | 1.00 | 0.73 | 0.93 | 0.72 | 0.93  | 0.00 | 0.71 | 0.03 | 0.84 | 0.77 | 0.87 | 0.23 | 1.10    | 0.00                                                  | Q10222513                                                  | unknown (Solanum tuberosum)                            |
| MCRO0309C1_05m scf_138       | 0.40 | 0.00 | 0.95 | 0.63 | 1.02 | 0.95 | 3.13  | 0.00 | 0.59 | 0.02 | 0.90 | 0.39 | 1.15 | 0.33 | 2.93    | 0.00                                                  | Q0223123                                                   | unknown (Solanum tuberosum)                            |
| MCRO1005C1_05m scf_430       | 0.67 | 0.11 | 0.77 | 0.11 | 0.87 | 0.44 | 1.99  | 0.00 | 0.69 | 0.00 | 0.87 | 0.28 | 0.63 | 0.66 | 1.11    | 0.00                                                  | Q0223232                                                   | unknown (Solanum tuberosum)                            |
| SDBT011016scf_11             | 0.86 | 0.05 | 0.92 | 0.64 | 1.01 | 0.94 | 3.21  | 0.00 | 0.87 | 0.25 | 0.99 | 0.92 | 1.01 | 0.84 | 2.91    | 0.00                                                  | NA                                                         | unknown (Solanum tuberosum)                            |
| BF_C50X00X_Q022101_TMSCF_109 | 0.88 | 0.25 | 1.23 | 0.15 | 1.17 | 0.26 | 2.67  | 0.00 | 0.78 | 0.18 | 0.92 | 0.56 | 0.81 | 0.45 | 2.03    | 0.00                                                  | Q02110071                                                  | SPCL1, Solanum tuberosum                               |
| MCRO1705C1_786               | 0.70 | 0.02 | 0.99 | 0.97 | 0.84 | 1.99 | 0.00  | 0.51 | 0.02 | 0.70 | 0.06 | 1.51 | 0.68 | 1.72 | 0.01    | AF133423                                              | cruciform1, Lycopodium obscurum                            |                                                        |
| MCRO1424C4_529               | 0.62 | 0.00 | 0.99 | 1.22 | 0.60 | 1.39 | 0.00  | 0.93 | 0.87 | 0.73 | 0.15 | 1.66 | 0.02 | 2.28 | 0.01    | AP006288                                              | homobiosynthetic aspartic protein (Pimpinella brachycarpa) |                                                        |
| MCRO1908C1_586               | 0.63 | 0.00 | 0.75 | 0.11 | 0.97 | 0.84 | 1.89  | 0.00 | 0.96 | 0.30 | 1.00 | 0.97 | 1.19 | 0.21 | 1.61    | 0.00                                                  | Q1014488                                                   | protein kinase M1 (Solanum tuberosum)                  |
| MCRO3898C2_241               | 0.87 | 0.22 | 0.85 | 0.31 | 1.01 | 0.92 | 1.82  | 0.00 | 0.81 | 0.16 | 0.92 | 0.84 | 1.08 | 0.56 | 1.58    | 0.00                                                  | AM66298                                                    | Os02g071800 (Oryza sativa ( japonica cultivar-group))  |
| MCRO1226C1_976               | 0.74 | 0.04 | 1.04 | 0.82 | 1.23 | 0.41 | 3.00  | 0.00 | 0.85 | 0.24 | 0.88 | 0.37 | 1.13 | 0.45 | 2.50    | 0.00                                                  | BT014382                                                   | unknown (Solanum tuberosum)                            |
| MCRO0306C1_460               | 0.77 | 0.07 | 0.85 | 0.24 | 1.06 | 0.87 | 2.21  | 0.00 | 0.87 | 0.46 | 0.60 | 0.60 | 1.08 | 0.78 | 2.38    | 0.00                                                  | Q0240205                                                   | unknown (Solanum tuberosum)                            |
| MCRO4931C1_746               | 0.60 | 0.04 | 0.83 | 0.31 | 0.83 | 0.39 | 2.29  | 0.00 | 0.80 | 0.14 | 1.21 | 0.32 | 1.47 | 0.24 | 3.37    | 0.02                                                  | BT014337                                                   | Os05g0612800 (Oryza sativa ( japonica cultivar-group)) |
| EST18471_202                 | 0.72 | 0.02 | 0.92 | 0.54 | 1.06 | 0.87 | 2.03  | 0.00 | 0.80 | 0.15 | 0.91 | 0.56 | 0.98 | 0.97 | 2.00    | 0.00                                                  | BT014336                                                   | Protein kinase M1 (Solanum tuberosum)                  |
| MCRO3898C2_269               | 0.58 | 0.03 | 0.88 | 0.03 | 1.11 | 0.50 | 2.08  | 0.01 | 0.90 | 0.43 | 0.69 | 0.07 | 1.23 | 0.28 | 1.28    | 0.00                                                  | NA                                                         | accessory protein 1B (Populus tremula)                 |
| MCRO1841C2_1204              | 0.20 | 0.00 | 0.78 | 0.19 | 0.52 | 0.11 | 3.12  | 0.00 | 0.78 | 0.27 | 0.82 | 0.33 | 2.85 | 0.25 | 3.59    | 0.00                                                  | NA                                                         | ZOG-Fer11 oxenolase (Medicago truncatula)              |
| MCRO0483C2_304               | 0.73 | 0.03 | 0.74 | 0.10 | 0.87 | 0.33 | 1.64  | 0.04 | 1.02 | 0.83 | 1.03 | 0.85 | 1.21 | 0.15 | 2.18    | 0.00                                                  | BT013555                                                   | unknown (Solanum tuberosum)                            |
| MCRO1908C2_1016              | 0.43 | 0.00 | 1.04 | 0.74 | 1.14 | 0.56 | 3.46  | 0.00 | 0.44 | 0.00 | 0.78 | 0.07 | 0.97 | 0.74 | 2.47    | 0.00                                                  | Q0207880                                                   | unknown (Solanum tuberosum)                            |
| MCRO1846C1_520               | 0.91 | 0.42 | 1.12 | 0.88 | 0.31 | 1.80 | 0.01  | 0.59 | 0.05 | 0.88 | 0.30 | 0.86 | 1.17 | 0.98 | 0.00    | NA                                                    | WOUND-INDUCED PROTEIN 1                                    |                                                        |
| ACDAD0593D5_73m scf_138      | 0.65 | 0.02 | 1.03 | 0.81 | 0.97 | 0.90 | 2.10  | 0.00 | 0.68 | 0.05 | 0.92 | 0.73 | 0.61 | 0.95 | 1.93    | 0.01                                                  | BT013751                                                   | NA                                                     |
| MCRO1087C1_1313              | 0.64 | 0.00 | 1.09 | 0.51 | 0.76 | 0.11 | 2.08  | 0.00 | 0.46 | 0.06 | 0.90 | 0.90 | 0.92 | 2.47 | 0.00    | AM44291                                               | unknown protein (Arabidopsis thaliana)                     |                                                        |
| TBR04168FD04_03m scf_150     | 0.47 | 0.00 | 0.60 | 0.02 | 0.60 | 0.01 | 1.47  | 0.03 | 1.04 | 0.84 | 1.97 | 0.42 | 1.92 | 0.00 | 0.00    | Q0203084                                              | NA                                                         |                                                        |
| MCRO1087C1_1126              | 0.63 | 0.02 | 0.84 | 0.30 | 0.81 | 0.34 | 2.01  | 0.00 | 0.66 | 0.33 | 1.25 | 0.27 | 3.07 | 0.00 | AM44292 | Os02g072800 (Oryza sativa ( japonica cultivar-group)) |                                                            |                                                        |
| MCRO1886C1_699               | 0.22 | 0.00 | 1.75 | 0.22 | 0.20 | 0.01 | 6.90  | 0.03 | 0.78 | 0.58 | 0.79 | 0.69 | 0.93 | 0.84 | 40.83   | 0.00                                                  | NA                                                         | Ca/calmodulin-binding protein (Medicago truncatula)    |
| MCRO1746C2_617               | 0.72 | 0.06 | 0.85 | 0.24 | 1.12 | 0.37 | 3.71  | 0.00 | 0.84 | 0.30 | 0.78 | 0.09 | 1.02 | 0.91 | 2.52    | 0.00                                                  | BT013706                                                   | Ca/calmodulin-binding protein (Medicago truncatula)    |
| MCRO1707C1_274               | 0.73 | 0.04 | 1.03 | 0.71 | 0.84 | 0.62 | 2.00  | 0.00 | 0.89 | 0.43 | 0.93 | 0.99 | 1.18 | 2.29 | 0.00    | NA                                                    | unknown (Solanum tuberosum)                                |                                                        |
| MCRO1707C1_274               | 0.73 | 0.04 | 1.03 | 0.71 | 0.84 | 0.62 | 2.00  | 0.00 | 0.89 | 0.43 | 0.93 | 0.99 | 1.18 | 2.29 | 0.00    | NA                                                    | unknown (Solanum tuberosum)                                |                                                        |
| MCRO1707C1_274               | 0.73 | 0.04 | 1.03 | 0.71 | 0.84 | 0.62 | 2.00  | 0.00 | 0.89 | 0.43 | 0.93 | 0.99 | 1.18 | 2.29 | 0.00    | NA                                                    | unknown (Solanum tuberosum)                                |                                                        |
| MCRO1707C1_274               | 0.73 | 0.04 | 1.03 | 0.71 | 0.84 | 0.62 | 2.00  | 0.00 | 0.89 | 0.43 | 0.93 | 0.99 | 1.18 | 2.29 | 0.00    | NA                                                    | unknown (Solanum tuberosum)                                |                                                        |
| MCRO1707C1_274               | 0.73 | 0.04 | 1.03 | 0.71 | 0.84 | 0.62 | 2.00  | 0.00 | 0.89 | 0.43 | 0.93 | 0.99 | 1.18 | 2.29 | 0.00    | NA                                                    | unknown (Solanum tuberosum)                                |                                                        |
| MCRO1707C1_274               | 0.73 | 0.04 | 1.03 | 0.71 | 0.84 | 0.62 | 2.00  | 0.00 | 0.89 | 0.43 | 0.93 | 0.99 | 1.18 | 2.29 | 0.00    | NA                                                    | unknown (Solanum tuberosum)                                |                                                        |
| MCRO1707C1_274               | 0.73 | 0.04 | 1.03 | 0.71 | 0.84 | 0.62 | 2.00  | 0.00 | 0.89 | 0.43 | 0.93 | 0.99 | 1.18 | 2.29 | 0.00    | NA                                                    | unknown (Solanum tuberosum)                                |                                                        |
| MCRO1707C1_274               | 0.73 | 0.04 | 1.03 | 0.71 | 0.84 | 0.62 | 2.00  | 0.00 | 0.89 | 0.43 | 0.93 | 0.99 | 1.18 | 2.29 | 0.00    | NA                                                    | unknown (Solanum tuberosum)                                |                                                        |
| MCRO1707C1_274               | 0.73 | 0.04 | 1.03 | 0.71 | 0.84 | 0.62 | 2.00  | 0.00 | 0.89 | 0.43 | 0.93 | 0.99 | 1.18 | 2.29 | 0.00    | NA                                                    | unknown (Solanum tuberosum)                                |                                                        |
| MCRO1707C1_274               | 0.73 | 0.04 | 1.03 | 0.71 | 0.84 | 0.62 | 2.00  | 0.00 | 0.89 | 0.43 | 0.93 | 0.99 | 1.18 | 2.29 | 0.00    | NA                                                    | unknown (Solanum tuberosum)                                |                                                        |
| MCRO1707C1_274               | 0.73 | 0.04 | 1.03 | 0.71 | 0.84 | 0.62 | 2.00  | 0.00 | 0.89 | 0.43 | 0.93 | 0.99 | 1.18 | 2.29 | 0.00    | NA                                                    | unknown (Solanum tuberosum)                                |                                                        |
| MCRO1707C1_274               | 0.73 | 0.04 | 1.03 | 0.71 | 0.84 | 0.62 | 2.00  | 0.00 | 0.89 | 0.43 | 0.93 | 0.99 | 1.18 | 2.29 | 0.00    | NA                                                    | unknown (Solanum tuberosum)                                |                                                        |
| MCRO1707C1_274               | 0.73 | 0.04 | 1.03 | 0.71 | 0.84 | 0.62 | 2.00  | 0.00 | 0.89 | 0.43 | 0.93 | 0.99 | 1.18 | 2.29 | 0.00    | NA                                                    | unknown (Solanum tuberosum)                                |                                                        |
| MCRO1707C1_274               | 0.73 | 0.04 | 1.03 | 0.71 | 0.84 | 0.62 | 2.00  | 0.00 | 0.89 | 0.43 | 0.93 | 0.99 | 1.18 | 2.29 | 0.00    | NA                                                    | unknown (Solanum tuberosum)                                |                                                        |
| MCRO1707C1_274               | 0.73 | 0.04 | 1.03 | 0.71 | 0.84 | 0.62 | 2.00  | 0.00 | 0.89 | 0.43 | 0.93 | 0.99 | 1.18 | 2.29 | 0.00    | NA                                                    | unknown (Solanum tuberosum)                                |                                                        |
| MCRO1707C1_274               | 0.73 | 0.04 | 1.03 | 0.71 | 0.84 | 0.62 | 2.00  | 0.00 | 0.89 | 0.43 | 0.93 | 0.99 | 1.18 | 2.29 | 0.00    | NA                                                    | unknown (Solanum tuberosum)                                |                                                        |
| MCRO1707C1_274               | 0.73 | 0.04 | 1.03 | 0.71 | 0.84 | 0.62 | 2.00  | 0.00 | 0.89 | 0.43 | 0.93 | 0.99 | 1.18 | 2.29 | 0.00    | NA                                                    | unknown (Solanum tuberosum)                                |                                                        |
| MCRO1707C1_274               | 0.73 | 0.04 | 1.03 | 0.71 | 0.84 | 0.62 | 2.00  | 0.00 | 0.89 | 0.43 | 0.93 | 0.99 | 1.18 | 2.29 | 0.00    | NA                                                    | unknown (Solanum tuberosum)                                |                                                        |
| MCRO1707C1_274               | 0.73 | 0.04 | 1.03 | 0.71 | 0.84 | 0.62 | 2.00  | 0.00 | 0.89 | 0.43 | 0.93 | 0.99 | 1.18 | 2.29 | 0.00    | NA                                                    | unknown (Solanum tuberosum)                                |                                                        |
| MCRO1707C1_274               | 0.73 | 0.04 | 1.03 | 0.71 | 0.84 | 0.62 | 2.00  | 0.00 | 0.89 | 0.43 | 0.93 | 0.99 | 1.18 | 2.29 | 0.00    | NA                                                    | unknown (Solanum tuberosum)                                |                                                        |
| MCRO1707C1_274               | 0.73 | 0.04 | 1.03 | 0.71 | 0.84 | 0.62 | 2.00  | 0.00 | 0.89 | 0.43 | 0.93 | 0.99 | 1.18 | 2.29 | 0.00    | NA                                                    | unknown (Solanum tuberosum)                                |                                                        |
| MCRO1707C1_274               | 0.73 | 0.04 | 1.03 | 0.71 | 0.84 | 0.62 | 2.00  | 0.00 | 0.89 | 0.43 | 0.93 | 0.99 | 1.18 | 2.29 | 0.00    | NA                                                    | unknown (Solanum tuberosum)                                |                                                        |
| MCRO1707C1_274               | 0.73 | 0.04 | 1.03 | 0.71 | 0.84 | 0.62 | 2.00  | 0.00 | 0.89 | 0.43 | 0.93 | 0.99 | 1.18 | 2.29 | 0.00    | NA                                                    | unknown (Solanum tuberosum)                                |                                                        |
| MCRO1707C1_274               | 0.73 | 0.04 | 1.03 | 0.71 | 0.84 | 0.62 | 2.00  | 0.00 | 0.89 | 0.43 | 0.93 | 0.99 | 1.18 | 2.29 | 0.00    | NA                                                    | unknown (Solanum tuberosum)                                |                                                        |
| MCRO1707C1_274               | 0.73 | 0.04 | 1.03 | 0.71 | 0.84 | 0.62 | 2.00  | 0.00 | 0.89 | 0.43 | 0.93 | 0.99 | 1.18 | 2.29 | 0.00    | NA                                                    | unknown (Solanum tuberosum)                                |                                                        |
| MCRO1707C1_274               | 0.73 | 0.04 | 1.03 | 0.71 | 0.84 | 0.62 | 2.00  | 0.00 | 0.89 | 0.43 | 0.93 | 0.99 | 1.18 | 2.29 | 0.00    | NA                                                    | unknown (Solanum tuberosum)                                |                                                        |
| MCRO1707C1_274               | 0.73 | 0.04 | 1.03 | 0.71 | 0.84 | 0.62 | 2.00  | 0.00 | 0.89 | 0.43 | 0.93 | 0.99 | 1.18 | 2.29 | 0.00    | NA                                                    | unknown (Solanum tuberosum)                                |                                                        |
| MCRO1707C1_27                |      |      |      |      |      |      |       |      |      |      |      |      |      |      |         |                                                       |                                                            |                                                        |

|                             |      |      |      |      |      |      |      |      |      |      |      |      |      |      |       |      |           |                                                                                   |                                                  |
|-----------------------------|------|------|------|------|------|------|------|------|------|------|------|------|------|------|-------|------|-----------|-----------------------------------------------------------------------------------|--------------------------------------------------|
| bf_suscep_0014693fm_scf_52  | 0.78 | 0.23 | 1.22 | 0.19 | 1.22 | 0.66 | 3.18 | 0.00 | 0.69 | 0.06 | 0.05 | 0.01 | 0.68 | 0.08 | 2.07  | 0.00 | NA        |                                                                                   |                                                  |
| bf_suscep_0009003fm_scf_152 | 0.81 | 0.00 | 0.00 | 0.00 | 0.00 | 0.00 | 0.00 | 0.00 | 0.00 | 0.00 | 0.00 | 0.00 | 0.00 | 0.00 | 0.00  | 0.00 | NA        | transcription factor 1 (Arabidopsis thaliana)                                     |                                                  |
| bf_suscep_0017117fm_scf_873 | 0.82 | 0.01 | 0.83 | 0.26 | 0.83 | 0.64 | 3.81 | 0.00 | 0.76 | 0.13 | 0.06 | 0.04 | 0.76 | 0.07 | 0.91  | 3.07 | 0.00      | hypothetical protein Gm_017842 (Oryza sativa Japonica cultivar-group)             |                                                  |
| MCR02347_C1_569             | 0.87 | 0.21 | 0.83 | 0.25 | 0.99 | 0.91 | 1.88 | 0.00 | 0.78 | 0.11 | 0.06 | 0.74 | 0.95 | 0.58 | 1.75  | 0.00 | NA        |                                                                                   |                                                  |
| MCR03378_C4_1661            | 0.87 | 0.00 | 0.81 | 0.43 | 0.00 | 0.16 | 2.81 | 0.00 | 0.81 | 0.00 | 0.00 | 0.81 | 0.00 | 1.17 | 0.12  | 0.89 | 0.00      | RNA-binding protein AKR1-like (Solanum tuberosum)                                 |                                                  |
| MCR02824_C1_372             | 0.87 | 0.01 | 0.87 | 0.13 | 0.81 | 0.32 | 1.86 | 0.01 | 0.74 | 0.07 | 0.12 | 0.53 | 0.25 | 0.11 | 2.89  | 0.00 | MM_105845 | antipeptide transport/transceptor (Arabidopsis thaliana)                          |                                                  |
| FR020211fm_scf_481          | 0.87 | 0.29 | 0.81 | 0.27 | 0.81 | 0.27 | 0.81 | 0.00 | 0.81 | 0.00 | 0.00 | 0.81 | 0.00 | 1.18 | 0.00  | 0.00 | 0.00      | transcription factor 1 (Arabidopsis thaliana)                                     |                                                  |
| MCR016375_C1_1254           | 0.88 | 0.13 | 0.86 | 0.80 | 1.20 | 0.29 | 2.05 | 0.00 | 0.77 | 0.11 | 0.00 | 0.50 | 0.86 | 0.31 | 1.57  | 0.02 | CU041360  | Zinc finger, GATA-type, ZIM C-CT (Medicago truncatula)                            |                                                  |
| MCR02046_C1_1254            | 0.88 | 0.27 | 1.14 | 0.41 | 1.21 | 0.19 | 1.76 | 0.01 | 0.69 | 0.06 | 0.07 | 0.29 | 1.02 | 0.90 | 1.43  | 0.08 | NA        | hypothetical protein Gm_031408 (Oryza sativa indica cultivar-group)               |                                                  |
| ACM0459920_3fm_scf_598      | 0.89 | 0.00 | 1.00 | 0.13 | 1.14 | 0.62 | 2.05 | 0.00 | 0.86 | 0.04 | 0.08 | 0.04 | 0.88 | 0.47 | 1.89  | 0.00 | CU011732  | Zinc finger, CCHC-type, Zinc finger, RPD3-like (Medicago truncatula)              |                                                  |
| SSR0201N1_scaf_187          | 0.94 | 0.02 | 0.48 | 0.00 | 0.93 | 0.00 | 2.97 | 0.00 | 0.76 | 0.12 | 0.14 | 0.30 | 1.17 | 0.23 | 2.52  | 0.00 | AF070967  | NA                                                                                |                                                  |
| CU015201N_444               | 0.95 | 0.14 | 0.91 | 0.27 | 0.93 | 0.00 | 1.66 | 0.00 | 0.72 | 0.06 | 0.00 | 0.64 | 0.81 | 0.00 | 1.00  | 0.00 | NA        | unknown protein (Arabidopsis thaliana)                                            |                                                  |
| MCR014625_C2_1084           | 0.91 | 0.05 | 0.98 | 0.93 | 0.99 | 0.88 | 6.88 | 0.00 | 0.80 | 0.51 | 0.02 | 0.20 | 1.00 | 0.99 | 2.74  | 0.01 | CU047090  | unknown protein (Arabidopsis thaliana)                                            |                                                  |
| bf_suscep_0009113fm_scf_11  | 0.93 | 0.00 | 0.76 | 0.99 | 0.87 | 0.53 | 2.47 | 0.00 | 0.85 | 0.20 | 1.01 | 0.94 | 1.01 | 0.85 | 2.57  | 0.00 | AF070967  | Sho1-like protein 3 (Petraea inflata)                                             |                                                  |
| P0967006_scf_400            | 0.99 | 0.00 | 0.25 | 0.00 | 0.00 | 0.19 | 1.53 | 0.00 | 0.61 | 0.03 | 0.73 | 0.16 | 0.05 | 0.00 | 0.92  | 0.24 | NA        | NA                                                                                |                                                  |
| MCR02527_C2_400             | 0.97 | 0.01 | 0.91 | 0.92 | 0.73 | 0.96 | 1.31 | 0.09 | 0.60 | 0.93 | 0.10 | 0.44 | 1.09 | 0.64 | 2.26  | 0.00 | AMM7737   | CeD110559200 (Oryza sativa Japonica cultivar-group)                               |                                                  |
| MCR03658_C2_621             | 0.98 | 0.17 | 0.99 | 0.96 | 0.94 | 0.34 | 4.10 | 0.00 | 0.66 | 0.05 | 0.82 | 0.41 | 1.01 | 0.97 | 1.87  | 0.00 | NA        | transcription factor zinc ion binding (Arabidopsis thaliana)                      |                                                  |
| MCR01458_C2_685             | 0.94 | 0.00 | 0.81 | 0.21 | 1.08 | 0.52 | 1.27 | 0.11 | 0.64 | 0.05 | 0.82 | 0.40 | 0.86 | 0.00 | 1.96  | 0.01 | AP06730   | unknown protein (Arabidopsis thaliana)                                            |                                                  |
| TBSK01588F02_3fm_scf_108    | 0.98 | 0.01 | 1.06 | 0.64 | 0.96 | 0.60 | 2.46 | 0.00 | 0.78 | 0.14 | 0.88 | 0.86 | 0.94 | 0.56 | 2.03  | 0.00 | NA        | transcription factor zinc ion binding (Arabidopsis thaliana)                      |                                                  |
| MCR02973_C3_413             | 0.97 | 0.00 | 1.10 | 0.93 | 0.90 | 0.12 | 1.84 | 0.01 | 0.53 | 0.01 | 0.85 | 0.33 | 0.22 | 0.48 | 2.03  | 0.00 | CU010385  | transcription factor zinc ion binding (Arabidopsis thaliana)                      |                                                  |
| ACM046897E01_3fm_scf_308    | 0.44 | 0.00 | 0.99 | 0.92 | 0.93 | 0.76 | 1.92 | 0.01 | 0.67 | 0.02 | 0.79 | 0.12 | 1.11 | 0.59 | 1.91  | 0.01 | CU0204268 | CeD170028100 (Oryza sativa Japonica cultivar-group)                               |                                                  |
| MCR01847_C3_108             | 0.45 | 0.00 | 0.67 | 0.93 | 1.04 | 0.76 | 1.90 | 0.30 | 0.54 | 0.11 | 0.84 | 0.11 | 0.26 | 0.00 | 6.83  | 0.00 | CU0204268 | unknown (Solanum tuberosum)                                                       |                                                  |
| ACM04081C09_3fm_scf_340     | 0.17 | 0.00 | 0.50 | 0.01 | 0.73 | 0.38 | 8.86 | 0.00 | 0.58 | 0.02 | 0.69 | 0.97 | 0.01 | 0.02 | 8.18  | 0.00 | AK224822  | NA                                                                                |                                                  |
| MCR010838_C1_337            | 0.74 | 0.05 | 0.98 | 0.91 | 0.97 | 0.74 | 1.66 | 0.03 | 0.72 | 0.08 | 0.99 | 0.96 | 0.97 | 0.80 | 1.54  | 0.03 | NA        | NHLB ubiquitin-protein ligase of zinc ion binding (Arabidopsis thaliana)          |                                                  |
| MCR018122_1173              | 0.68 | 0.01 | 0.86 | 0.41 | 1.09 | 0.39 | 2.14 | 0.00 | 0.82 | 0.19 | 0.86 | 0.78 | 1.08 | 0.60 | 1.80  | 0.01 | NA        | CU003043500 (Oryza sativa Japonica cultivar-group)                                |                                                  |
| MCR04429_C1_680             | 0.64 | 0.01 | 0.68 | 0.03 | 0.88 | 0.30 | 1.64 | 0.02 | 0.77 | 0.18 | 0.04 | 0.86 | 1.13 | 0.30 | 1.76  | 0.08 | AMM79511  | Dual specificity protein phosphatase (Medicago truncatula)                        |                                                  |
| MCR01768_C1_277             | 0.95 | 0.90 | 1.62 | 0.93 | 0.88 | 0.49 | 2.91 | 0.00 | 0.60 | 0.04 | 1.14 | 0.40 | 1.44 | 0.30 | 3.03  | 0.00 | AF027957  | Epimastix-like MDS3-like protein 8L (Medicago truncatula)                         |                                                  |
| MCR02073_C5_773             | 0.94 | 0.02 | 0.05 | 0.65 | 1.04 | 0.83 | 3.84 | 0.00 | 0.66 | 0.11 | 0.78 | 0.26 | 1.05 | 0.88 | 3.03  | 0.01 | NA        | isochlorogenic acid/caffeoyl-CoA ligase (Medicago truncatula)                     |                                                  |
| MCR013483_C1_1094           | 0.73 | 0.06 | 0.99 | 0.92 | 0.96 | 0.88 | 1.66 | 0.03 | 0.62 | 0.15 | 1.05 | 0.77 | 0.98 | 0.97 | 1.61  | 0.05 | NA        | F-box family protein-like (Oryza sativa Japonica cultivar-group)                  |                                                  |
| MCR017813_C1_417            | 0.90 | 0.00 | 0.77 | 0.49 | 1.06 | 0.63 | 8.91 | 0.00 | 0.62 | 0.01 | 0.79 | 0.78 | 1.46 | 0.56 | 12.18 | 0.00 | NA        | C-methyltransferase (Pisum sativum)                                               |                                                  |
| MCR01416_C17_1426           | 0.89 | 0.22 | 1.30 | 0.13 | 1.18 | 0.22 | 2.79 | 0.00 | 0.62 | 0.03 | 0.71 | 0.19 | 0.92 | 0.55 | 1.50  | 0.04 | CU0203384 | unknown protein (Arabidopsis thaliana)                                            |                                                  |
| MCR01053_C2_277             | 0.41 | 0.00 | 0.84 | 0.21 | 1.04 | 0.89 | 4.24 | 0.00 | 0.76 | 0.04 | 1.02 | 0.99 | 0.07 | 0.78 | 4.18  | 0.00 | CU012478  | Arabidopsis-unique protein (UC-7) (Solanum tuberosum crystallinum)                |                                                  |
| MCR017420_C1_1206           | 0.77 | 0.05 | 0.85 | 0.29 | 0.69 | 0.69 | 1.61 | 0.02 | 0.61 | 0.21 | 0.92 | 0.55 | 1.08 | 0.49 | 1.61  | 0.02 | AF029738  | UBIAX1 (Medicago truncatula)                                                      |                                                  |
| bf_suscep_0001403fm_scf_634 | 0.93 | 0.01 | 1.07 | 0.77 | 1.07 | 0.77 | 1.07 | 0.00 | 0.81 | 0.12 | 0.87 | 0.81 | 1.15 | 0.13 | 0.77  | 0.00 | AF272345  | putative serine/threonine (SR) protein kinase protein (Solanum tuberosum)         |                                                  |
| ACM04206402_3fm_scf_59      | 0.41 | 0.00 | 0.93 | 0.61 | 1.06 | 0.79 | 2.31 | 0.00 | 0.69 | 0.09 | 0.83 | 0.42 | 1.10 | 0.61 | 2.46  | 0.00 | CU0204268 | NA                                                                                |                                                  |
| MCR01038_C1_853             | 0.64 | 0.00 | 0.81 | 0.13 | 0.84 | 0.00 | 0.81 | 0.00 | 0.63 | 0.01 | 0.87 | 0.47 | 0.60 | 0.00 | 1.00  | 0.00 | NA        | unknown protein (Arabidopsis thaliana)                                            |                                                  |
| MCR00946_C1_648             | 0.80 | 0.37 | 0.93 | 0.66 | 1.10 | 0.43 | 1.71 | 0.01 | 0.79 | 0.15 | 0.89 | 0.49 | 0.97 | 0.80 | 1.33  | 0.00 | AMM5794   | S-adenosylmethionine-dependent methyltransferase/catalytic (Arabidopsis thaliana) |                                                  |
| IST442071_252               | 0.63 | 0.01 | 0.71 | 0.05 | 0.84 | 0.15 | 1.45 | 0.03 | 0.97 | 0.80 | 1.05 | 0.42 | 0.89 | 0.49 | 1.65  | 0.01 | NA        | putative ATP-dependent RNA helicase (Arabidopsis thaliana)                        |                                                  |
| ST1867TV_003                | 0.97 | 0.03 | 0.64 | 0.04 | 0.84 | 0.01 | 2.25 | 0.00 | 0.84 | 0.01 | 0.83 | 0.29 | 1.01 | 0.83 | 1.69  | 0.00 | NA        | NA                                                                                |                                                  |
| MCR013884_C2_157            | 0.47 | 0.01 | 0.68 | 0.66 | 0.77 | 0.30 | 2.17 | 0.00 | 0.79 | 0.28 | 1.16 | 0.47 | 1.13 | 0.36 | 2.31  | 0.00 | CU0203393 | putative flavonol synthase-like protein (Euphorbia esula)                         |                                                  |
| ACM046897E01_3fm_scf_308    | 0.45 | 0.00 | 0.67 | 0.93 | 1.04 | 0.76 | 1.90 | 0.30 | 0.54 | 0.11 | 0.84 | 0.11 | 0.26 | 0.00 | 6.83  | 0.00 | CU0204268 | unknown (Solanum tuberosum)                                                       |                                                  |
| MCR03403_C4_21              | 0.75 | 0.15 | 0.98 | 0.19 | 1.44 | 0.00 | 1.65 | 0.02 | 1.01 | 0.97 | 0.88 | 0.38 | 0.39 | 0.18 | 3.23  | 0.00 | AV497477  | zeolobion endonucleonuclease-histone-like XTH5 (Solanum esculentum)               |                                                  |
| bf_suscep_0028902fm_scf_495 | 0.78 | 0.13 | 0.93 | 0.85 | 1.24 | 0.12 | 2.39 | 0.00 | 0.82 | 0.27 | 0.79 | 0.97 | 0.89 | 0.50 | 1.43  | 0.07 | NA        | unknown protein (Arabidopsis thaliana)                                            |                                                  |
| MCR011894_C4_170            | 0.14 | 0.00 | 0.81 | 0.00 | 0.81 | 0.00 | 1.89 | 0.01 | 0.63 | 0.00 | 0.81 | 0.00 | 1.00 | 0.00 | 1.30  | 0.00 | NA        | unknown protein (Arabidopsis thaliana)                                            |                                                  |
| DF5F04F_scf_562             | 0.93 | 0.00 | 0.88 | 0.69 | 0.82 | 0.66 | 2.88 | 0.00 | 0.62 | 0.00 | 0.94 | 0.70 | 0.90 | 0.69 | 2.53  | 0.00 | NA        | unknown protein (Arabidopsis thaliana)                                            |                                                  |
| MCR01741_C1_632             | 0.97 | 0.17 | 0.97 | 0.89 | 0.82 | 0.66 | 2.88 | 0.00 | 0.62 | 0.00 | 0.94 | 0.70 | 0.90 | 0.69 | 2.53  | 0.00 | NA        | unknown protein (Arabidopsis thaliana)                                            |                                                  |
| MCR02096_C2_1999            | 0.98 | 0.03 | 0.83 | 0.20 | 1.02 | 0.87 | 1.84 | 0.00 | 0.78 | 0.07 | 0.92 | 0.49 | 0.84 | 0.82 | 1.98  | 0.00 | AF136300  | 35S ribosomal protein L23 precursor (Solanum tuberosum)                           |                                                  |
| MCR03396_C3_525             | 0.88 | 0.02 | 0.71 | 0.06 | 1.24 | 0.05 | 2.35 | 0.00 | 0.86 | 0.78 | 0.73 | 0.19 | 1.16 | 0.39 | 2.49  | 0.00 | CU0203256 | zinc finger protein 2 (Solanum esculentum)                                        |                                                  |
| T09C09F_scf_53              | 0.98 | 0.00 | 0.83 | 0.06 | 0.77 | 0.07 | 1.77 | 0.02 | 0.83 | 0.23 | 1.24 | 0.30 | 1.24 | 0.24 | 0.00  | 0.00 | NA        | NA                                                                                |                                                  |
| MCR013300_C1_462            | 0.99 | 0.01 | 0.75 | 0.20 | 0.86 | 0.32 | 1.58 | 0.03 | 1.00 | 1.00 | 1.05 | 0.74 | 1.11 | 0.52 | 2.00  | 0.01 | NA        | unknown protein (Arabidopsis thaliana)                                            |                                                  |
| MCR01762_C1_747             | 0.61 | 0.00 | 0.81 | 0.28 | 0.88 | 0.00 | 0.81 | 0.00 | 0.61 | 0.00 | 0.81 | 0.00 | 0.81 | 0.00 | 0.81  | 0.00 | NA        | transcription factor zinc ion binding (Arabidopsis thaliana)                      |                                                  |
| MCR01043_C1_804             | 0.97 | 0.01 | 0.72 | 0.09 | 1.06 | 0.67 | 1.89 | 0.03 | 0.82 | 0.18 | 0.97 | 0.37 | 0.38 | 0.02 | 2.42  | 0.00 | NA        | unknown protein (Arabidopsis thaliana)                                            |                                                  |
| IST3191017M_001             | 0.88 | 0.54 | 0.86 | 0.28 | 1.08 | 0.44 | 3.88 | 0.00 | 0.92 | 0.44 | 0.86 | 0.26 | 0.87 | 0.43 | 3.36  | 0.00 | CU0102803 | CeD1a0281000 (Oryza sativa Japonica cultivar-group)                               |                                                  |
| MCR02096_C3_525             | 0.99 | 0.01 | 1.00 | 1.00 | 1.00 | 0.71 | 2.96 | 0.00 | 0.81 | 0.17 | 0.91 | 0.60 | 1.05 | 0.60 | 2.92  | 0.02 | AF223305  | unknown protein (Oryza sativa indica cultivar-group)                              |                                                  |
| MCR00807_C4_444             | 0.10 | 0.00 | 0.26 | 0.00 | 0.26 | 0.01 | 0.61 | 0.02 | 0.74 | 0.39 | 1.57 | 0.12 | 1.63 | 0.23 | 3.56  | 0.00 | AMM02042  | NA                                                                                |                                                  |
| MCR012588_C2_1424           | 0.81 | 0.01 | 0.79 | 0.13 | 0.81 | 0.00 | 0.81 | 0.00 | 0.61 | 0.00 | 0.81 | 0.00 | 0.81 | 0.00 | 0.81  | 0.00 | NA        | unknown protein (Arabidopsis thaliana)                                            |                                                  |
| MCR0458_C3_1317             | 0.99 | 0.01 | 1.02 | 0.87 | 0.74 | 0.13 | 1.97 | 0.02 | 0.81 | 0.04 | 1.05 | 0.72 | 2.21 | 0.52 | 2.42  | 0.00 | CU0102721 | EM11075_cytochrome P450 (Arabidopsis thaliana)                                    |                                                  |
| MCR02782_C2_348             | 0.89 | 0.02 | 0.86 | 0.37 | 0.89 | 0.44 | 1.47 | 0.04 | 0.85 | 0.73 | 0.97 | 0.83 | 1.27 | 0.17 | 1.60  | 0.02 | AC187540  | Quinonotriene alcohol dehydrogenase-like (Medicago truncatula)                    |                                                  |
| bf_suscep_0013063fm_scf_432 | 0.88 | 0.31 | 0.88 | 0.31 | 0.88 | 0.31 | 0.88 | 0.00 | 0.88 | 0.31 | 0.88 | 0.31 | 0.88 | 0.31 | 0.88  | 0.31 | 0.88      | 0.31                                                                              | CU0203250 (Oryza sativa Japonica cultivar-group) |
| P09C0727V_386               | 0.66 | 0.00 | 0.81 | 0.29 | 0.91 | 0.44 | 2.69 | 0.01 | 0.81 | 0.30 | 1.07 | 0.60 | 1.01 | 0.95 | 1.80  | 0.01 | AMM74727  | fiber protein Ft12 (Solanum tuberosum)                                            |                                                  |
| MCR00844_C1_391             | 0.47 | 0.06 | 0.85 | 0.85 | 0.91 | 0.14 | 2.54 | 0.00 | 0.83 | 0.05 | 0.82 | 0.47 | 1.20 | 0.46 | 1.98  | 0.00 | AMM44544  | unknown protein (Arabidopsis thaliana)                                            |                                                  |
| MCR01894602_3fm_scf_466     | 0.53 | 0.00 | 0.66 | 0.00 | 0.66 | 0.00 | 0.66 | 0.00 | 0.66 | 0.00 | 0.66 | 0.00 | 0.66 | 0.00 | 0.66  | 0.00 | NA        | NA                                                                                |                                                  |
| MCR03847_C2_1               | 0.60 | 0.01 | 1.12 | 0.50 | 0.93 | 0.63 | 1.93 | 0.00 | 0.81 | 0.21 | 0.97 | 0.74 | 0.07 | 0.81 | 1.69  | 0.01 | AC149290  | hypothetical protein STM_2700015 (Solanum demissum)                               |                                                  |
| MCR03396_C1_646             | 0.74 | 0.10 | 0.91 | 0.37 | 1.00 | 0.60 |      |      |      |      |      |      |      |      |       |      |           |                                                                                   |                                                  |

|                                 |      |      |      |      |      |      |      |      |      |      |      |      |      |      |      |      |           |                                                                                                                      |                                                   |
|---------------------------------|------|------|------|------|------|------|------|------|------|------|------|------|------|------|------|------|-----------|----------------------------------------------------------------------------------------------------------------------|---------------------------------------------------|
| MCR0288.C1.1388                 | 2.36 | 0.02 | 0.62 | 0.60 | 0.89 | 0.54 | 0.44 | 0.00 | 1.88 | 0.02 | 1.12 | 0.31 | 0.03 | 0.80 | 0.22 | 0.00 | BT012930  | PED1 (PEROXISOME DEFECTIVE 1) (Arabidopsis thaliana)                                                                 |                                                   |
| CS1587H.127                     | 1.66 | 0.10 | 0.95 | 0.93 | 1.84 | 0.54 | 0.44 | 0.00 | 1.84 | 0.02 | 1.12 | 0.31 | 0.03 | 0.80 | 0.22 | 0.00 | AT5G5641  | sucrose synthase 2 (Solanum tuberosum)                                                                               |                                                   |
| MCR0186.C5.699                  | 1.89 | 0.10 | 0.95 | 0.93 | 1.84 | 0.54 | 0.44 | 0.00 | 1.84 | 0.02 | 1.12 | 0.31 | 0.03 | 0.80 | 0.22 | 0.00 | AT5G5684  | sucrose synthase 2 (Solanum tuberosum)                                                                               |                                                   |
| bt_susceptor_002080015m_scf_311 | 0.91 | 0.57 | 1.07 | 0.85 | 0.98 | 0.50 | 0.39 | 0.00 | 1.55 | 0.02 | 1.11 | 0.43 | 1.11 | 0.61 | 0.43 | 0.00 | AT5G5682  | unassigned protein product (Arabidopsis thaliana)                                                                    |                                                   |
| MCR011705.C1.666                | 2.68 | 0.02 | 1.17 | 1.18 | 0.21 | 0.26 | 0.44 | 0.00 | 0.21 | 0.33 | 0.18 | 0.38 | 0.87 | 0.67 | 0.00 | 0.00 | NA        | MAM1662                                                                                                              | unassigned protein product (Arabidopsis thaliana) |
| MCR016638.C1.536                | 2.95 | 0.00 | 1.90 | 1.83 | 0.17 | 0.35 | 0.00 | 0.08 | 0.95 | 0.81 | 0.15 | 0.79 | 0.48 | 0.21 | 0.00 | 0.00 | AMM4370   | Phosphatidylserine 3- and 4-kinase catalytic (Ubiquitin Medicago truncatula)                                         |                                                   |
| MCR013121.C1.104                | 3.92 | 0.00 | 1.91 | 1.84 | 0.17 | 0.35 | 0.00 | 0.08 | 0.95 | 0.81 | 0.15 | 0.79 | 0.48 | 0.21 | 0.00 | 0.00 | AT5G1168  | unassigned protein product (Arabidopsis thaliana)                                                                    |                                                   |
| MCR015345.C1.957                | 4.98 | 0.00 | 1.19 | 1.40 | 0.24 | 0.61 | 0.20 | 0.00 | 2.37 | 0.17 | 0.06 | 0.81 | 0.71 | 0.60 | 0.14 | 0.00 | NA        | unassigned protein product (Arabidopsis thaliana)                                                                    |                                                   |
| MCR02262.C1.1024                | 0.94 | 0.60 | 0.98 | 0.90 | 0.30 | 0.73 | 0.19 | 0.00 | 1.30 | 0.15 | 1.50 | 0.33 | 1.13 | 0.43 | 0.21 | 0.00 | BT012541  | RAM11B (Locus accession)                                                                                             |                                                   |
| CS181311H.113                   | 1.42 | 0.17 | 1.21 | 1.27 | 0.21 | 0.13 | 0.21 | 0.00 | 1.10 | 0.23 | 0.43 | 0.24 | 0.28 | 0.29 | 0.00 | 0.00 | AMM4443   | cytochrome P450 (cytochrome P450 subunit, 85G Medicago truncatula)                                                   |                                                   |
| MCR014329.451                   | 6.15 | 0.00 | 2.20 | 2.00 | 1.56 | 0.14 | 0.27 | 0.00 | 1.81 | 0.24 | 0.94 | 0.67 | 0.49 | 0.19 | 0.23 | 0.00 | AT272748  | unassigned protein product (Arabidopsis thaliana)                                                                    |                                                   |
| MCR010351.C1.328                | 1.48 | 0.13 | 1.30 | 1.31 | 0.19 | 0.02 | 0.27 | 0.00 | 1.60 | 0.09 | 0.71 | 0.18 | 0.22 | 0.00 | 0.00 | 0.00 | AT272748  | unassigned protein product (Arabidopsis thaliana)                                                                    |                                                   |
| MCR012722.C2.22                 | 1.49 | 0.02 | 1.16 | 1.30 | 1.11 | 0.44 | 0.09 | 0.03 | 1.15 | 0.25 | 0.08 | 0.84 | 0.76 | 0.07 | 0.54 | 0.01 | AMM51762  | unassigned protein product (Arabidopsis thaliana)                                                                    |                                                   |
| MCR01847.C1.1109                | 1.48 | 0.02 | 1.11 | 1.20 | 1.06 | 0.65 | 0.55 | 0.25 | 1.16 | 0.40 | 0.93 | 0.62 | 1.03 | 0.86 | 0.53 | 0.00 | AMM6502   | unassigned protein product (Arabidopsis thaliana)                                                                    |                                                   |
| MCR013045.C1.691                | 1.92 | 0.01 | 1.22 | 1.29 | 0.92 | 0.65 | 0.16 | 1.14 | 0.48 | 0.77 | 0.21 | 1.08 | 0.70 | 0.47 | 0.10 | 0.00 | NA        | unassigned protein product (Arabidopsis thaliana)                                                                    |                                                   |
| MCR019913.C1.1247               | 1.86 | 0.00 | 1.15 | 1.34 | 1.42 | 0.08 | 0.05 | 0.29 | 1.41 | 0.04 | 0.65 | 0.65 | 0.91 | 0.61 | 0.53 | 0.00 | AMM2781   | ATP binding/kinase protein serine/threonine kinase (Arabidopsis thaliana)                                            |                                                   |
| MCR013684.C1.1549               | 1.47 | 0.04 | 0.76 | 0.77 | 1.09 | 0.80 | 0.86 | 0.00 | 2.09 | 0.65 | 0.84 | 0.64 | 1.14 | 0.24 | 0.48 | 0.00 | AT014358  | 12-cis-hydroxytetradenoate reductase 3.172-oxo-phytylreductase-10.11-reductase 3.1 (QPOA-reductase 3) (Lycopersicon) |                                                   |
| MCR06037.C1.813                 | 1.73 | 0.01 | 2.00 | 2.25 | 1.25 | 0.45 | 0.63 | 0.05 | 1.65 | 0.01 | 0.90 | 0.50 | 0.45 | 0.26 | 0.56 | 0.06 | NA        | unassigned protein product (Arabidopsis thaliana)                                                                    |                                                   |
| MCR05162.C1.1715                | 2.73 | 0.00 | 1.39 | 1.11 | 1.56 | 0.21 | 0.40 | 0.02 | 1.54 | 0.14 | 0.96 | 0.75 | 1.15 | 0.45 | 0.38 | 0.00 | BT012722  | phosphatidylcholine N-methyltransferase II (cytochrome P450 reductase)                                               |                                                   |
| MCR018131.C1.1430               | 1.73 | 0.00 | 1.66 | 1.60 | 1.10 | 0.51 | 0.33 | 0.00 | 1.39 | 0.23 | 1.09 | 0.56 | 0.63 | 0.01 | 0.24 | 0.00 | AT413501  | Aspartate aminotransferase, cytosolic (Transaminase A)                                                               |                                                   |
| MCR04345.C1.116                 | 4.07 | 0.01 | 1.47 | 1.04 | 1.23 | 0.19 | 0.59 | 0.10 | 0.39 | 0.00 | 1.11 | 0.47 | 0.96 | 0.84 | 0.33 | 0.00 | U118986   | unassigned protein product (Arabidopsis thaliana)                                                                    |                                                   |
| MCR04427.C2.1917                | 0.98 | 0.32 | 0.66 | 0.53 | 0.93 | 0.38 | 0.39 | 0.00 | 1.69 | 0.22 | 0.61 | 0.51 | 0.42 | 0.32 | 0.22 | 0.00 | AT5G3958  | unassigned protein product (Arabidopsis thaliana)                                                                    |                                                   |
| BF_LBCHXXX_004502_TMSMCF_411    | 1.11 | 0.40 | 0.87 | 0.97 | 0.65 | 0.07 | 0.43 | 0.00 | 2.21 | 0.00 | 1.44 | 0.04 | 0.78 | 0.01 | 0.63 | 0.01 | NA        | unassigned protein product (Arabidopsis thaliana)                                                                    |                                                   |
| MCR08922.C1.440                 | 1.42 | 0.05 | 0.90 | 0.91 | 0.91 | 0.84 | 0.30 | 0.00 | 2.58 | 0.01 | 1.53 | 0.10 | 0.82 | 0.14 | 0.27 | 0.00 | NA        | unassigned protein product (Arabidopsis thaliana)                                                                    |                                                   |
| MCR013195.C1.815                | 2.63 | 0.00 | 1.90 | 1.91 | 1.61 | 0.04 | 0.05 | 0.04 | 0.88 | 0.40 | 0.83 | 0.28 | 0.90 | 0.61 | 0.41 | 0.00 | AT5G1823  | alpha-glucosidase II (cytochrome P450 reductase)                                                                     |                                                   |
| SSRTO611xsf_413                 | 0.82 | 0.27 | 0.89 | 0.57 | 0.83 | 0.46 | 0.25 | 0.01 | 1.24 | 0.16 | 1.38 | 0.20 | 1.22 | 0.16 | 0.23 | 0.00 | AMM6886   | RAB11B (Locus accession)                                                                                             |                                                   |
| MCR015831.C1.487                | 1.63 | 0.21 | 1.72 | 1.56 | 0.88 | 0.88 | 0.85 | 0.00 | 3.19 | 0.00 | 1.92 | 0.96 | 0.62 | 0.20 | 0.10 | 0.00 | AT777542  | Arp2/3-3 rapidly elicited protein 181 (Nicotiana glauca)                                                             |                                                   |
| MCR02001.C1.1205                | 2.02 | 0.07 | 1.28 | 1.16 | 0.75 | 0.15 | 0.19 | 0.00 | 2.12 | 0.09 | 1.33 | 0.26 | 0.65 | 0.30 | 0.15 | 0.01 | BT013838  | cytochrome P450-like protein (CYP2A5 human)                                                                          |                                                   |
| SSRTO516xsf_528                 | 1.74 | 0.01 | 1.00 | 1.00 | 1.24 | 0.55 | 0.22 | 0.00 | 1.16 | 0.11 | 1.11 | 0.56 | 0.84 | 0.52 | 0.14 | 0.00 | AMM7530   | Os202751800 (Ornithine 5-lyase (ornithine decarboxylase))                                                            |                                                   |
| MCR01096.C1.05                  | 1.08 | 0.56 | 1.08 | 0.54 | 1.18 | 0.18 | 0.38 | 0.00 | 1.16 | 0.30 | 1.04 | 0.70 | 0.93 | 0.19 | 0.36 | 0.00 | AT272902  | non-phosphotransferase (Lycopersicon)                                                                                |                                                   |
| MCR07018.C1.1121                | 1.70 | 0.01 | 0.70 | 0.68 | 1.56 | 0.43 | 0.63 | 0.02 | 1.84 | 0.04 | 0.90 | 0.61 | 1.66 | 0.44 | 0.59 | 0.00 | AT272992  | transcription factor CavPRK1 (Capsicum annuum)                                                                       |                                                   |
| MCR014951.C1.1199               | 3.68 | 0.00 | 1.77 | 1.71 | 0.21 | 0.78 | 0.01 | 0.44 | 0.61 | 0.46 | 0.25 | 0.89 | 0.54 | 0.66 | 0.11 | 0.38 | 0.01      | AT166549                                                                                                             | unassigned protein product (Arabidopsis thaliana) |
| MCR0886.C1.369                  | 1.48 | 0.08 | 1.19 | 1.38 | 1.18 | 0.22 | 0.25 | 0.00 | 1.37 | 0.06 | 1.01 | 0.96 | 0.77 | 0.04 | 0.27 | 0.00 | MM_112234 | unassigned protein product (Arabidopsis thaliana)                                                                    |                                                   |
| MCR02259.C2.1563                | 1.66 | 0.01 | 1.35 | 1.41 | 1.38 | 0.31 | 0.43 | 0.01 | 2.33 | 0.00 | 1.14 | 0.48 | 0.72 | 0.16 | 0.20 | 0.00 | AT202078  | glucose acyltransferase (Solanum tuberosum)                                                                          |                                                   |
| MCR012305.C1.021                | 2.13 | 0.11 | 0.23 | 0.13 | 0.23 | 0.44 | 0.05 | 0.03 | 1.49 | 0.01 | 0.39 | 0.09 | 1.20 | 0.23 | 0.00 | 0.00 | AMM4121   | Ornithine lyase (Ornithine decarboxylase)                                                                            |                                                   |
| MCR019641.C2.896                | 3.07 | 0.00 | 1.16 | 0.52 | 1.06 | 0.86 | 0.51 | 0.01 | 1.47 | 0.03 | 0.97 | 0.83 | 0.76 | 0.11 | 0.59 | 0.05 | NA        | unassigned protein product (Arabidopsis thaliana)                                                                    |                                                   |
| bt_susceptor_00104010m_scf_369  | 3.86 | 0.00 | 0.07 | 0.07 | 0.07 | 0.07 | 0.07 | 0.07 | 0.07 | 0.07 | 0.07 | 0.07 | 0.07 | 0.07 | 0.07 | 0.00 | AT262479  | unassigned protein product (Arabidopsis thaliana)                                                                    |                                                   |
| MCR017593.C1.323                | 1.26 | 0.10 | 0.82 | 0.44 | 0.80 | 0.38 | 0.44 | 0.01 | 3.43 | 0.00 | 0.26 | 0.14 | 0.95 | 0.85 | 0.31 | 0.00 | NA        | unassigned protein product (Arabidopsis thaliana)                                                                    |                                                   |
| MCR02883.C1.891                 | 1.54 | 0.01 | 1.02 | 0.91 | 0.93 | 0.78 | 0.44 | 0.00 | 1.87 | 0.01 | 1.28 | 0.11 | 0.90 | 0.41 | 0.38 | 0.00 | BT012930  | PED1 (PEROXISOME DEFECTIVE 1) (Arabidopsis thaliana)                                                                 |                                                   |
| MCR018035.C1.471                | 1.73 | 0.00 | 1.99 | 1.99 | 1.80 | 0.23 | 0.23 | 0.00 | 1.80 | 0.23 | 0.23 | 0.20 | 0.20 | 0.20 | 0.20 | 0.00 | AT262936  | carbonate dehydratase/zinc-finger binding (Arabidopsis thaliana)                                                     |                                                   |
| MCR012126.C1.685                | 2.65 | 0.05 | 2.26 | 2.03 | 1.72 | 0.08 | 0.19 | 0.01 | 0.72 | 0.28 | 1.05 | 0.75 | 0.40 | 0.00 | 0.13 | 0.00 | BT014571  | ACR4: amino acid binding (Arabidopsis thaliana)                                                                      |                                                   |
| MCR012342.C1.628                | 2.08 | 0.00 | 1.28 | 1.28 | 1.28 | 1.28 | 1.28 | 1.28 | 1.28 | 1.28 | 1.28 | 1.28 | 1.28 | 1.28 | 1.28 | 0.00 | AT262936  | carbonate dehydratase/zinc-finger binding (Arabidopsis thaliana)                                                     |                                                   |
| MCR010101.C1.842                | 1.75 | 0.02 | 1.14 | 0.95 | 1.27 | 0.17 | 0.28 | 0.01 | 1.29 | 0.13 | 0.97 | 0.86 | 0.92 | 0.73 | 0.18 | 0.00 | AMM43480  | unassigned protein product (Arabidopsis thaliana)                                                                    |                                                   |
| MCR019101.C1.676                | 1.08 | 0.60 | 1.39 | 0.77 | 1.07 | 0.67 | 0.54 | 0.01 | 1.48 | 0.05 | 1.23 | 0.19 | 0.13 | 0.83 | 0.41 | 0.00 | NA        | unassigned protein product (Arabidopsis thaliana)                                                                    |                                                   |
| MCR012626.C1.1446               | 2.13 | 0.00 | 1.49 | 1.49 | 1.67 | 0.63 | 0.83 | 0.16 | 1.41 | 0.39 | 0.77 | 0.26 | 0.77 | 0.26 | 0.41 | 0.00 | AMM16204  | cytochrome oxidase zinc-finger binding (Arabidopsis thaliana)                                                        |                                                   |
| MCR04693.C1.1269                | 2.04 | 0.01 | 1.39 | 1.12 | 1.52 | 0.02 | 0.64 | 0.07 | 1.70 | 0.10 | 0.85 | 0.35 | 0.79 | 0.21 | 0.35 | 0.00 | NA        | unassigned protein product (Arabidopsis thaliana)                                                                    |                                                   |
| SSRTO2020m_264                  | 1.47 | 0.00 | 1.47 | 1.47 | 1.47 | 1.47 | 1.47 | 1.47 | 1.47 | 1.47 | 1.47 | 1.47 | 1.47 | 1.47 | 1.47 | 0.00 | NA        | unassigned protein product (Arabidopsis thaliana)                                                                    |                                                   |
| MCR05336.C1.563                 | 2.30 | 0.00 | 1.15 | 0.56 | 1.32 | 0.24 | 0.36 | 0.00 | 1.34 | 0.06 | 0.93 | 0.54 | 1.18 | 0.38 | 0.82 | 0.25 | BT014526  | phosphatidylcholine N-methyltransferase II (cytochrome P450 reductase)                                               |                                                   |
| MCR01388.C12.575                | 1.43 | 0.02 | 0.66 | 0.60 | 0.93 | 0.64 | 0.60 | 0.01 | 2.67 | 0.00 | 1.32 | 0.17 | 1.42 | 0.17 | 0.88 | 0.67 | AMM49816  | isopentenyl diphosphate isomerase 2 (Nicotiana glauca)                                                               |                                                   |
| MCR012626.C1.1446               | 2.13 | 0.00 | 1.49 | 1.49 | 1.67 | 0.63 | 0.83 | 0.16 | 1.41 | 0.39 | 0.77 | 0.26 | 0.77 | 0.26 | 0.41 | 0.00 | AMM16204  | cytochrome oxidase zinc-finger binding (Arabidopsis thaliana)                                                        |                                                   |
| MCR04693.C1.1269                | 2.04 | 0.01 | 1.39 | 1.12 | 1.52 | 0.02 | 0.64 | 0.07 | 1.70 | 0.10 | 0.85 | 0.35 | 0.79 | 0.21 | 0.35 | 0.00 | NA        | unassigned protein product (Arabidopsis thaliana)                                                                    |                                                   |
| SSRTO2020m_264                  | 1.47 | 0.00 | 1.47 | 1.47 | 1.47 | 1.47 | 1.47 | 1.47 | 1.47 | 1.47 | 1.47 | 1.47 | 1.47 | 1.47 | 1.47 | 0.00 | NA        | unassigned protein product (Arabidopsis thaliana)                                                                    |                                                   |
| MCR05336.C1.563                 | 2.30 | 0.00 | 1.15 | 0.56 | 1.32 | 0.24 | 0.36 | 0.00 | 1.34 | 0.06 | 0.93 | 0.54 | 1.18 | 0.38 | 0.82 | 0.25 | BT014526  | phosphatidylcholine N-methyltransferase II (cytochrome P450 reductase)                                               |                                                   |
| MCR01388.C12.575                | 1.43 | 0.02 | 0.66 | 0.60 | 0.93 | 0.64 | 0.60 | 0.01 | 2.67 | 0.00 | 1.32 | 0.17 | 1.42 | 0.17 | 0.88 | 0.67 | AMM49816  | isopentenyl diphosphate isomerase 2 (Nicotiana glauca)                                                               |                                                   |
| MCR012626.C1.1446               | 2.13 | 0.00 | 1.49 | 1.49 | 1.67 | 0.63 | 0.83 | 0.16 | 1.41 | 0.39 | 0.77 | 0.26 | 0.77 | 0.26 | 0.41 | 0.00 | AMM16204  | cytochrome oxidase zinc-finger binding (Arabidopsis thaliana)                                                        |                                                   |
| MCR04693.C1.1269                | 2.04 | 0.01 | 1.39 | 1.12 | 1.52 | 0.02 | 0.64 | 0.07 | 1.70 | 0.10 | 0.85 | 0.35 | 0.79 | 0.21 | 0.35 | 0.00 | NA        | unassigned protein product (Arabidopsis thaliana)                                                                    |                                                   |
| SSRTO2020m_264                  | 1.47 | 0.00 | 1.47 | 1.47 |      |      |      |      |      |      |      |      |      |      |      |      |           |                                                                                                                      |                                                   |



|                  |      |      |      |      |      |      |      |      |      |      |      |      |      |      |      |      |                                         |                                                                                                                       |
|------------------|------|------|------|------|------|------|------|------|------|------|------|------|------|------|------|------|-----------------------------------------|-----------------------------------------------------------------------------------------------------------------------|
| MCRO4874.C1_626  | 1.92 | 0.10 | 1.08 | 0.52 | 0.91 | 0.92 | 0.54 | 0.01 | 1.71 | 0.01 | 0.96 | 0.73 | 0.99 | 0.90 | 0.54 | 0.01 | AJ077739                                | w-3 dehydratase (Solanium tuberosum)                                                                                  |
| MCRO3624.C1_1138 | 1.98 | 0.02 | 0.88 | 0.89 | 1.95 | 0.57 | 0.65 | 0.04 | 1.83 | 0.01 | 1.01 | 0.83 | 0.94 | 0.84 | 0.69 | 0.19 | NA                                      | acid deacetylase (Citrus sinensis)                                                                                    |
| MCRO2851.C1_604  | 1.71 | 0.01 | 1.27 | 0.93 | 0.72 | 0.48 | 0.10 | 1.24 | 0.21 | 0.91 | 0.63 | 0.88 | 0.58 | 0.36 | 0.10 | NA   | Glucan-3-phosphate dehydrogenase (NAD+) |                                                                                                                       |
| MCRO361.C1_1451  | 1.73 | 0.02 | 0.86 | 0.88 | 0.43 | 0.03 | 0.03 | 0.03 | 0.07 | 0.03 | 0.47 | 0.11 | 0.97 | 0.89 | 0.27 | 0.11 | NA                                      | phosphatase (CORYLIUS COCCUS)                                                                                         |
| MCRO7102.C1_583  | 2.36 | 0.01 | 1.13 | 0.81 | 1.33 | 0.57 | 0.18 | 0.00 | 3.04 | 0.02 | 1.06 | 0.63 | 0.80 | 0.11 | 0.14 | 0.00 | NA                                      | unknown (Arabidopsis thaliana)                                                                                        |
| MCRO3908.C1_1208 | 1.80 | 0.09 | 0.64 | 0.85 | 0.89 | 0.50 | 0.00 | 0.00 | 0.02 | 0.00 | 0.60 | 0.80 | 0.80 | 0.80 | 0.80 | 0.80 | NA                                      | Ornithine O-methyltransferase (Nicotiana glauca)                                                                      |
| MCRO12466.C1_775 | 1.96 | 0.00 | 1.41 | 0.99 | 1.06 | 0.69 | 0.60 | 0.00 | 1.88 | 0.00 | 1.10 | 0.52 | 0.63 | 0.04 | 0.51 | 0.04 | AM45767                                 | hydroxylase protein MdDRAFT_AC146757.00 Medicago truncatula                                                           |
| MCRO2996.C2_1443 | 1.62 | 0.01 | 1.16 | 0.41 | 1.19 | 0.27 | 0.22 | 0.00 | 1.29 | 0.16 | 1.03 | 0.82 | 0.65 | 0.06 | 0.17 | 0.00 | AK229933                                | nucleic acid binding transcription factor zinc ion binding (Arabidopsis thaliana)                                     |
| MCRO1105.C2_14   | 1.99 | 0.12 | 0.91 | 0.12 | 0.98 | 0.42 | 0.14 | 0.01 | 0.88 | 0.42 | 0.71 | 0.24 | 0.15 | 0.14 | 0.43 | 0.00 | AK081243                                | hydroxylase protein Arabidopsis thaliana Nucleosuccinyl transferase TH13 (Lycopersicon esculentum)                    |
| MCRO13509.C1_686 | 2.03 | 0.00 | 1.17 | 0.20 | 1.35 | 0.56 | 0.10 | 0.00 | 1.27 | 0.17 | 0.85 | 0.48 | 0.47 | 0.12 | 0.00 | 0.00 | AF147775                                | TK1-like deoxyribonucleic acid kinase 4 (Lycopersicon esculentum)                                                     |
| U31247111_534    | 0.89 | 0.00 | 0.95 | 0.56 | 0.58 | 0.20 | 0.00 | 0.27 | 0.01 | 0.11 | 0.00 | 0.00 | 0.00 | 0.00 | 0.00 | 0.00 | AM441073                                | unknown (Arabidopsis thaliana)                                                                                        |
| MCRO4755.C1_544  | 1.31 | 0.05 | 1.15 | 0.25 | 1.08 | 0.57 | 0.66 | 0.01 | 2.07 | 0.00 | 0.00 | 0.98 | 1.11 | 0.37 | 0.68 | 0.00 | AJ007739                                | Ornithine-3-lyase-like dehydratase, chloroplast precursor, cytosolic, expressed (Opuntia stricta (cactus/cactaceae))  |
| MCRO1547.C1_1038 | 1.18 | 0.34 | 0.84 | 0.46 | 1.06 | 0.45 | 0.32 | 0.00 | 1.56 | 0.44 | 1.33 | 0.10 | 1.13 | 0.39 | 0.43 | 0.00 | NA                                      | DNA binding /transcription factor (Arabidopsis thaliana)                                                              |
| MCRO3672.C1_663  | 1.91 | 0.02 | 1.01 | 0.61 | 1.00 | 0.30 | 0.21 | 0.00 | 1.64 | 0.22 | 1.05 | 0.56 | 0.67 | 0.09 | 0.04 | 0.00 | NA                                      | Ornithine-3-lyase-like dehydratase, chloroplast precursor, cytosolic, expressed (Opuntia stricta (cactus/cactaceae))  |
| U31247111_534    | 1.29 | 0.10 | 1.46 | 0.08 | 1.18 | 0.43 | 0.37 | 0.01 | 1.38 | 0.03 | 0.91 | 0.72 | 0.60 | 0.01 | 0.25 | 0.00 | AF177655                                | erythrose-binding protein (Lycopersicon esculentum)                                                                   |
| U31247111_534    | 1.56 | 0.05 | 0.91 | 0.68 | 0.99 | 0.31 | 0.56 | 0.00 | 1.96 | 0.00 | 1.64 | 0.01 | 0.66 | 0.48 | 0.03 | 0.00 | U22922                                  | phenolase oxidase 8, chloroplast precursor (Populus alba (cottonwood))                                                |
| MCRO646.C3_150   | 3.72 | 0.03 | 0.97 | 0.18 | 1.14 | 0.38 | 0.26 | 0.00 | 1.24 | 0.36 | 1.14 | 0.31 | 0.74 | 0.14 | 0.28 | 0.00 | U22922                                  | phenolase oxidase 8, chloroplast precursor (Populus alba (cottonwood))                                                |
| MCRO3774.C1_930  | 2.92 | 0.00 | 1.37 | 0.14 | 0.54 | 0.38 | 0.14 | 0.00 | 2.10 | 0.00 | 1.63 | 0.02 | 0.22 | 0.01 | 0.20 | 0.02 | NA                                      | Flavin-8-oxidase (Arabidopsis thaliana)                                                                               |
| MCRO4278.C1_708  | 1.90 | 0.01 | 0.63 | 0.68 | 0.30 | 0.32 | 0.00 | 1.20 | 0.22 | 1.60 | 0.03 | 0.66 | 0.81 | 0.66 | 0.38 | 0.00 | AK06008                                 | Ornithine-3-lyase                                                                                                     |
| MCRO6622.C1_1146 | 1.66 | 0.05 | 1.13 | 0.42 | 1.09 | 0.52 | 0.36 | 0.02 | 1.68 | 0.17 | 1.04 | 0.77 | 0.82 | 0.30 | 0.32 | 0.03 | BT013054                                | aldose 1-epimerase (Arabidopsis thaliana)                                                                             |
| U31247111_534    | 1.18 | 0.15 | 1.06 | 0.63 | 1.28 | 0.87 | 0.44 | 0.01 | 1.33 | 0.06 | 0.99 | 0.97 | 0.72 | 0.03 | 0.41 | 0.00 | AF181034                                | ATPase (Arabidopsis thaliana)                                                                                         |
| MCRO1889.C3_1473 | 1.04 | 0.74 | 0.97 | 0.85 | 1.30 | 0.10 | 0.44 | 0.00 | 1.27 | 0.33 | 0.64 | 0.67 | 1.08 | 0.58 | 0.28 | 0.00 | AK0606                                  | 1,4-alpha-glucan branching enzyme (Solanium tuberosum)                                                                |
| MCRO2815.C1_603  | 2.86 | 0.00 | 0.93 | 0.69 | 0.69 | 0.36 | 0.34 | 0.01 | 1.97 | 0.07 | 1.37 | 0.10 | 0.84 | 0.66 | 0.37 | 0.02 | U2460179                                | acid phosphatase (Arabidopsis thaliana)                                                                               |
| MCRO13463.C1_820 | 2.00 | 0.03 | 1.21 | 0.28 | 1.31 | 0.69 | 0.42 | 0.00 | 1.12 | 0.56 | 0.93 | 0.81 | 0.66 | 0.68 | 0.26 | 0.00 | NA                                      | unknown (Arabidopsis thaliana)                                                                                        |
| MCRO1889.C4_21   | 1.00 | 0.76 | 1.01 | 0.92 | 1.26 | 0.56 | 0.43 | 0.01 | 1.37 | 0.21 | 0.98 | 0.85 | 0.86 | 0.82 | 0.31 | 0.00 | AK078786                                | 1,4-alpha-glucan branching enzyme (Solanium tuberosum)                                                                |
| U31247111_534    | 1.79 | 0.02 | 1.23 | 0.20 | 1.60 | 0.01 | 0.63 | 0.01 | 1.42 | 0.22 | 0.80 | 0.38 | 0.44 | 0.24 | 0.43 | 0.01 | AK051079                                | protein (Arabidopsis thaliana)                                                                                        |
| U31247111_534    | 1.75 | 0.03 | 0.84 | 0.67 | 1.41 | 0.09 | 0.08 | 0.00 | 1.70 | 0.24 | 1.02 | 0.92 | 1.18 | 0.81 | 0.11 | 0.00 | AF154655                                | peroxidase                                                                                                            |
| MCRO1889.C3_1473 | 1.18 | 0.15 | 1.06 | 0.63 | 1.28 | 0.87 | 0.44 | 0.01 | 1.33 | 0.06 | 0.99 | 0.97 | 0.72 | 0.03 | 0.41 | 0.00 | AF181034                                | ATPase (Arabidopsis thaliana)                                                                                         |
| MCRO2815.C1_603  | 2.86 | 0.00 | 0.93 | 0.69 | 0.69 | 0.36 | 0.34 | 0.01 | 1.97 | 0.07 | 1.37 | 0.10 | 0.84 | 0.66 | 0.37 | 0.02 | U2460179                                | acid phosphatase (Arabidopsis thaliana)                                                                               |
| MCRO13463.C1_820 | 2.00 | 0.03 | 1.21 | 0.28 | 1.31 | 0.69 | 0.42 | 0.00 | 1.12 | 0.56 | 0.93 | 0.81 | 0.66 | 0.68 | 0.26 | 0.00 | NA                                      | unknown (Arabidopsis thaliana)                                                                                        |
| MCRO1889.C4_21   | 1.00 | 0.76 | 1.01 | 0.92 | 1.26 | 0.56 | 0.43 | 0.01 | 1.37 | 0.21 | 0.98 | 0.85 | 0.86 | 0.82 | 0.31 | 0.00 | AK078786                                | 1,4-alpha-glucan branching enzyme (Solanium tuberosum)                                                                |
| U31247111_534    | 1.79 | 0.02 | 1.23 | 0.20 | 1.60 | 0.01 | 0.63 | 0.01 | 1.42 | 0.22 | 0.80 | 0.38 | 0.44 | 0.24 | 0.43 | 0.01 | AK051079                                | protein (Arabidopsis thaliana)                                                                                        |
| MCRO499.C1_1039  | 1.75 | 0.03 | 0.84 | 0.67 | 1.41 | 0.09 | 0.08 | 0.00 | 1.70 | 0.24 | 1.02 | 0.92 | 1.18 | 0.81 | 0.11 | 0.00 | AF154655                                | peroxidase                                                                                                            |
| MCRO3923.C1_702  | 1.18 | 0.15 | 1.06 | 0.63 | 1.28 | 0.87 | 0.44 | 0.01 | 1.33 | 0.06 | 0.99 | 0.97 | 0.72 | 0.03 | 0.41 | 0.00 | AF181034                                | ATPase (Arabidopsis thaliana)                                                                                         |
| MCRO4490.C1_1107 | 1.63 | 0.04 | 1.19 | 0.36 | 1.36 | 0.44 | 0.51 | 0.03 | 1.61 | 0.02 | 0.70 | 0.09 | 0.95 | 0.68 | 0.48 | 0.00 | AM44185                                 | ATP-binding /kinase protein kinase/protein-tyrosine kinase/structural constituent of cell wall (Arabidopsis thaliana) |
| U31247111_534    | 1.00 | 0.76 | 1.01 | 0.92 | 1.26 | 0.56 | 0.43 | 0.01 | 1.37 | 0.21 | 0.98 | 0.85 | 0.86 | 0.82 | 0.31 | 0.00 | AK078786                                | 1,4-alpha-glucan branching enzyme (Solanium tuberosum)                                                                |
| MCRO2815.C1_603  | 2.86 | 0.00 | 0.93 | 0.69 | 0.69 | 0.36 | 0.34 | 0.01 | 1.97 | 0.07 | 1.37 | 0.10 | 0.84 | 0.66 | 0.37 | 0.02 | U2460179                                | acid phosphatase (Arabidopsis thaliana)                                                                               |
| MCRO13463.C1_820 | 2.00 | 0.03 | 1.21 | 0.28 | 1.31 | 0.69 | 0.42 | 0.00 | 1.12 | 0.56 | 0.93 | 0.81 | 0.66 | 0.68 | 0.26 | 0.00 | NA                                      | unknown (Arabidopsis thaliana)                                                                                        |
| MCRO1889.C4_21   | 1.00 | 0.76 | 1.01 | 0.92 | 1.26 | 0.56 | 0.43 | 0.01 | 1.37 | 0.21 | 0.98 | 0.85 | 0.86 | 0.82 | 0.31 | 0.00 | AK078786                                | 1,4-alpha-glucan branching enzyme (Solanium tuberosum)                                                                |
| U31247111_534    | 1.79 | 0.02 | 1.23 | 0.20 | 1.60 | 0.01 | 0.63 | 0.01 | 1.42 | 0.22 | 0.80 | 0.38 | 0.44 | 0.24 | 0.43 | 0.01 | AK051079                                | protein (Arabidopsis thaliana)                                                                                        |
| MCRO2815.C1_603  | 2.86 | 0.00 | 0.93 | 0.69 | 0.69 | 0.36 | 0.34 | 0.01 | 1.97 | 0.07 | 1.37 | 0.10 | 0.84 | 0.66 | 0.37 | 0.02 | U2460179                                | acid phosphatase (Arabidopsis thaliana)                                                                               |
| MCRO13463.C1_820 | 2.00 | 0.03 | 1.21 | 0.28 | 1.31 | 0.69 | 0.42 | 0.00 | 1.12 | 0.56 | 0.93 | 0.81 | 0.66 | 0.68 | 0.26 | 0.00 | NA                                      | unknown (Arabidopsis thaliana)                                                                                        |
| MCRO1889.C4_21   | 1.00 | 0.76 | 1.01 | 0.92 | 1.26 | 0.56 | 0.43 | 0.01 | 1.37 | 0.21 | 0.98 | 0.85 | 0.86 | 0.82 | 0.31 | 0.00 | AK078786                                | 1,4-alpha-glucan branching enzyme (Solanium tuberosum)                                                                |
| U31247111_534    | 1.79 | 0.02 | 1.23 | 0.20 | 1.60 | 0.01 | 0.63 | 0.01 | 1.42 | 0.22 | 0.80 | 0.38 | 0.44 | 0.24 | 0.43 | 0.01 | AK051079                                | protein (Arabidopsis thaliana)                                                                                        |
| MCRO499.C1_1039  | 1.75 | 0.03 | 0.84 | 0.67 | 1.41 | 0.09 | 0.08 | 0.00 | 1.70 | 0.24 | 1.02 | 0.92 | 1.18 | 0.81 | 0.11 | 0.00 | AF154655                                | peroxidase                                                                                                            |
| MCRO3923.C1_702  | 1.18 | 0.15 | 1.06 | 0.63 | 1.28 | 0.87 | 0.44 | 0.01 | 1.33 | 0.06 | 0.99 | 0.97 | 0.72 | 0.03 | 0.41 | 0.00 | AF181034                                | ATPase (Arabidopsis thaliana)                                                                                         |
| MCRO4490.C1_1107 | 1.63 | 0.04 | 1.19 | 0.36 | 1.36 | 0.44 | 0.51 | 0.03 | 1.61 | 0.02 | 0.70 | 0.09 | 0.95 | 0.68 | 0.48 | 0.00 | AM44185                                 | ATP-binding /kinase protein kinase/protein-tyrosine kinase/structural constituent of cell wall (Arabidopsis thaliana) |
| U31247111_534    | 1.00 | 0.76 | 1.01 | 0.92 | 1.26 | 0.56 | 0.43 | 0.01 | 1.37 | 0.21 | 0.98 | 0.85 | 0.86 | 0.82 | 0.31 | 0.00 | AK078786                                | 1,4-alpha-glucan branching enzyme (Solanium tuberosum)                                                                |
| MCRO2815.C1_603  | 2.86 | 0.00 | 0.93 | 0.69 | 0.69 | 0.36 | 0.34 | 0.01 | 1.97 | 0.07 | 1.37 | 0.10 | 0.84 | 0.66 | 0.37 | 0.02 | U2460179                                | acid phosphatase (Arabidopsis thaliana)                                                                               |
| MCRO13463.C1_820 | 2.00 | 0.03 | 1.21 | 0.28 | 1.31 | 0.69 | 0.42 | 0.00 | 1.12 | 0.56 | 0.93 | 0.81 | 0.66 | 0.68 | 0.26 | 0.00 | NA                                      | unknown (Arabidopsis thaliana)                                                                                        |
| MCRO1889.C4_21   | 1.00 | 0.76 | 1.01 | 0.92 | 1.26 | 0.56 | 0.43 | 0.01 | 1.37 | 0.21 | 0.98 | 0.85 | 0.86 | 0.82 | 0.31 | 0.00 | AK078786                                | 1,4-alpha-glucan branching enzyme (Solanium tuberosum)                                                                |
| U31247111_534    | 1.79 | 0.02 | 1.23 | 0.20 | 1.60 | 0.01 | 0.63 | 0.01 | 1.42 | 0.22 | 0.80 | 0.38 | 0.44 | 0.24 | 0.43 | 0.01 | AK051079                                | protein (Arabidopsis thaliana)                                                                                        |
| MCRO499.C1_1039  | 1.75 | 0.03 | 0.84 | 0.67 | 1.41 | 0.09 | 0.08 | 0.00 | 1.70 | 0.24 | 1.02 | 0.92 | 1.18 | 0.81 | 0.11 | 0.00 | AF154655                                | peroxidase                                                                                                            |
| MCRO3923.C1_702  | 1.18 | 0.15 | 1.06 | 0.63 | 1.28 | 0.87 | 0.44 | 0.01 | 1.33 | 0.06 | 0.99 | 0.97 | 0.72 | 0.03 | 0.41 | 0.00 | AF181034                                | ATPase (Arabidopsis thaliana)                                                                                         |
| MCRO4490.C1_1107 | 1.63 | 0.04 | 1.19 | 0.36 | 1.36 | 0.44 | 0.51 | 0.03 | 1.61 | 0.02 | 0.70 | 0.09 | 0.95 | 0.68 | 0.48 | 0.00 | AM44185                                 | ATP-binding /kinase protein kinase/protein-tyrosine kinase/structural constituent of cell wall (Arabidopsis thaliana) |
| U31247111_534    | 1.00 | 0.76 | 1.01 | 0.92 | 1.26 | 0.56 | 0.43 | 0.01 | 1.37 | 0.21 | 0.98 | 0.85 | 0.86 | 0.82 | 0.31 | 0.00 | AK078786                                | 1,4-alpha-glucan branching enzyme (Solanium tuberosum)                                                                |
| MCRO2815.C1_603  | 2.86 | 0.00 | 0.93 | 0.69 | 0.69 | 0.36 | 0.34 | 0.01 | 1.97 | 0.07 | 1.37 | 0.10 | 0.84 | 0.66 | 0.37 | 0.02 | U2460179                                | acid phosphatase (Arabidopsis thaliana)</                                                                             |

|                             |      |      |      |      |      |      |      |      |      |      |      |      |      |      |      |      |          |                                                                     |
|-----------------------------|------|------|------|------|------|------|------|------|------|------|------|------|------|------|------|------|----------|---------------------------------------------------------------------|
| MCR0384.G2_677              | 1.01 | 0.96 | 1.10 | 0.86 | 0.76 | 0.37 | 0.20 | 0.01 | 2.10 | 0.00 | 3.24 | 0.00 | 1.93 | 0.06 | 0.42 | 0.02 | BT019342 | unknown protein (Arabidopsis thaliana)                              |
| bl_mw000_00391062fm.scd_1   | 0.91 | 0.49 | 1.09 | 0.01 | 1.69 | 0.21 | 0.74 | 0.06 | 1.92 | 0.50 | 1.11 | 0.48 | 0.08 | 0.08 | 0.23 | 0.01 | NA       | hypothetical protein (Sal. typhimuriana) (salicin catabolism group) |
| MCR0322.C1_884              | 1.31 | 0.05 | 0.87 | 0.60 | 1.02 | 0.87 | 0.55 | 0.00 | 0.99 | 0.96 | 1.48 | 0.03 | 1.33 | 0.20 | 0.47 | 0.06 | AJ237988 | cellulose repeat-unit-binding protein (Musa sapientum)              |
| bl_mw000_001260219m.scd_192 | 4.42 | 0.00 | 2.20 | 0.93 | 1.32 | 0.34 | 0.43 | 0.00 | 1.08 | 0.84 | 1.49 | 0.08 | 0.60 | 0.00 | 0.44 | 0.00 | D3622994 | proteinase inhibitor isoflavan (Solanum elaeagnifolium)             |
| bl_mw000_006700717m.scd_435 | 1.03 | 0.75 | 1.36 | 0.22 | 0.91 | 0.33 | 0.40 | 0.00 | 0.90 | 0.93 | 1.54 | 0.02 | 1.00 | 0.56 | 0.76 | 0.24 | NA       | polygalacturonase-inhibiting protein (Panicum americanum)           |
| bl_mw000_004490918m.scd_243 | 0.93 | 0.55 | 0.96 | 0.73 | 0.67 | 0.01 | 0.48 | 0.00 | 3.38 | 0.02 | 5.55 | 0.00 | 2.00 | 0.01 | 0.80 | 0.38 | AK224774 | B12D-like protein (Beta vulgaris)                                   |
